# Supplementary material for: A sex-specific evolutionary interaction between ADCY9 and CETP
Source: eLife journal article supplement (doi:10.7554/elife.69198), 2021-10-05
Supplement: supp [file elife-69198-supp-v1.zip]

Archive with 21 entries (21 files):
- elife_poa_e69198_Figure_3_figure_supplement_1.pdf
- elife_poa_e69198_Figure_3_figure_supplement_2.pdf
- elife_poa_e69198_Figure_4_figure_supplement_1.pdf
- elife_poa_e69198_Figure_4_figure_supplement_2.pdf
- elife_poa_e69198_Figure_4_figure_supplement_3.pdf
- elife_poa_e69198_Figure_5_figure_supplement_1.pdf
- elife_poa_e69198_Figure_5_figure_supplement_2.pdf
- elife_poa_e69198_Figure_6_figure_supplement_1.pdf
- elife_poa_e69198_Figure_6_figure_supplement_2.pdf
- elife_poa_e69198_Transparent_Reporting_File.pdf
- elife_poa_e69198_Figure_2_source_data_1.txt
- elife_poa_e69198_Figure_2_source_data_2.txt
- elife_poa_e69198_Figure_2_source_data_3.txt
- elife_poa_e69198_Figure_3_source_data_1.txt
- elife_poa_e69198_Figure_3_source_data_3.txt
- elife_poa_e69198_Figure_3_source_data_2.txt
- elife_poa_e69198_Figure_4_source_data_1.zip
- elife_poa_e69198_Figure_5_source_data_1.txt
- elife_poa_e69198_Figure_5_source_data_2.zip
- elife_poa_e69198_Figure_6_source_data_1.txt
- elife_poa_e69198_Figure_6_source_data_2.zip
