# Supplementary material for: A sex-specific evolutionary interaction between ADCY9 and CETP
Source: eLife journal article supplement (doi:10.7554/elife.69198), 2021-10-05
Supplement: supp [file elife-69198-supp-v1.zip › elife_poa_e69198_Figure_2_source_data_1.txt]

Pop	AA	AG	GG
	NaN	NaN	NaN
YRI (108)	0.5	0.388888888888889	0.111111111111111
LWK (99)	0.626262626262626	0.323232323232323	0.0505050505050505
GWD (113)	0.442477876106195	0.504424778761062	0.0530973451327434
MSL (85)	0.517647058823529	0.376470588235294	0.105882352941176
ESN (99)	0.474747474747475	0.444444444444444	0.0808080808080808
ASW (61)	0.475409836065574	0.442622950819672	0.0819672131147541
ACB (96)	0.416666666666667	0.53125	0.0520833333333333
	NaN	NaN	NaN
CEU (99)	0.151515151515152	0.525252525252525	0.323232323232323
TSI (107)	0.130841121495327	0.448598130841121	0.420560747663551
FIN (99)	0.202020202020202	0.505050505050505	0.292929292929293
GBR (91)	0.142857142857143	0.494505494505495	0.362637362637363
IBS (107)	0.205607476635514	0.476635514018692	0.317757009345794
	NaN	NaN	NaN
CHB (103)	0.213592233009709	0.388349514563107	0.398058252427184
JPT (104)	0.115384615384615	0.528846153846154	0.355769230769231
CHS (105)	0.19047619047619	0.514285714285714	0.295238095238095
CDX (93)	0.279569892473118	0.451612903225806	0.268817204301075
KHV (99)	0.252525252525253	0.525252525252525	0.222222222222222
	NaN	NaN	NaN
GIH (103)	0.310679611650485	0.543689320388349	0.145631067961165
PJL (96)	0.375	0.46875	0.15625
BEB (86)	0.313953488372093	0.418604651162791	0.267441860465116
STU (102)	0.303921568627451	0.431372549019608	0.264705882352941
ITU (102)	0.323529411764706	0.392156862745098	0.284313725490196
	NaN	NaN	NaN
MXL (64)	0.34375	0.5	0.15625
PUR (104)	0.25	0.557692307692308	0.192307692307692
CLM (94)	0.308510638297872	0.468085106382979	0.223404255319149
PEL (85)	0.6	0.341176470588235	0.0588235294117647
	NaN	NaN	NaN
ALT (104)	0.25	0.538461538461538	0.211538461538462
URY (55)	0.236363636363636	0.418181818181818	0.345454545454545
CHK (40)	0.3	0.6	0.1
NOA (81)	0.493827160493827	0.382716049382716	0.123456790123457
CEA (81)	0.493827160493827	0.382716049382716	0.123456790123457
CHP (61)	0.442622950819672	0.426229508196721	0.131147540983607
EQT (83)	0.421686746987952	0.457831325301205	0.120481927710843
AND (88)	0.590909090909091	0.352272727272727	0.0568181818181818
