# Supplementary material for: A sex-specific evolutionary interaction between ADCY9 and CETP
Source: eLife journal article supplement (doi:10.7554/elife.69198), 2021-10-05
Supplement: supp [file elife-69198-supp-v1.zip › elife_poa_e69198_Figure_2_source_data_2.txt]

POS	iHS	pop	bigpop
4012825	1.46549	YRI	AFR
4013144	0.0949628	YRI	AFR
4013467	1.00631	YRI	AFR
4013556	1.196	YRI	AFR
4014141	-0.711977	YRI	AFR
4014245	0.179579	YRI	AFR
4014770	-0.961319	YRI	AFR
4014922	0.591637	YRI	AFR
4014964	0.657015	YRI	AFR
4014982	1.6416	YRI	AFR
4015313	-0.671525	YRI	AFR
4015316	1.56771	YRI	AFR
4015729	-0.148712	YRI	AFR
4016355	1.29207	YRI	AFR
4016676	0.366313	YRI	AFR
4016943	1.24404	YRI	AFR
4017270	-1.2261	YRI	AFR
4017278	-0.72472	YRI	AFR
4017534	-0.524755	YRI	AFR
4017685	0.984791	YRI	AFR
4018031	0.827888	YRI	AFR
4018321	1.185	YRI	AFR
4018425	-0.758773	YRI	AFR
4018431	1.15158	YRI	AFR
4019114	0.779405	YRI	AFR
4019123	0.855838	YRI	AFR
4019216	0.937294	YRI	AFR
4019350	0.584617	YRI	AFR
4019530	-0.733853	YRI	AFR
4020391	-1.50797	YRI	AFR
4020579	0.790296	YRI	AFR
4020732	-0.849443	YRI	AFR
4021051	0.499377	YRI	AFR
4021734	0.370142	YRI	AFR
4021803	0.535726	YRI	AFR
4022067	0.831713	YRI	AFR
4022159	0.831713	YRI	AFR
4022167	-1.08892	YRI	AFR
4022638	-0.789349	YRI	AFR
4022694	-0.0100142	YRI	AFR
4022703	0.49539	YRI	AFR
4023022	0.713548	YRI	AFR
4023553	0.862448	YRI	AFR
4024446	-0.0877327	YRI	AFR
4025214	0.326469	YRI	AFR
4025385	0.374816	YRI	AFR
4026238	-1.00222	YRI	AFR
4026720	1.27457	YRI	AFR
4027399	0.384919	YRI	AFR
4027423	-0.387727	YRI	AFR
4027596	-1.10346	YRI	AFR
4027605	-0.389952	YRI	AFR
4027688	-0.332667	YRI	AFR
4027749	1.10587	YRI	AFR
4028015	0.619158	YRI	AFR
4028060	0.675985	YRI	AFR
4028145	0.229685	YRI	AFR
4028417	-0.205063	YRI	AFR
4028866	-0.358939	YRI	AFR
4028877	0.000571123	YRI	AFR
4029577	1.66382	YRI	AFR
4030550	0.852748	YRI	AFR
4030795	0.472753	YRI	AFR
4030928	0.151982	YRI	AFR
4030952	0.881298	YRI	AFR
4031140	0.210177	YRI	AFR
4031348	-0.4436	YRI	AFR
4031793	-0.206063	YRI	AFR
4031794	-0.476421	YRI	AFR
4032021	-1.03748	YRI	AFR
4032489	-0.384036	YRI	AFR
4032581	0.125741	YRI	AFR
4032716	-0.385581	YRI	AFR
4032802	1.35147	YRI	AFR
4033012	1.44372	YRI	AFR
4033054	0.869465	YRI	AFR
4033197	0.585265	YRI	AFR
4033436	0.96497	YRI	AFR
4033522	-0.268893	YRI	AFR
4033729	0.983831	YRI	AFR
4033987	-0.0964271	YRI	AFR
4034001	0.261844	YRI	AFR
4034067	1.24882	YRI	AFR
4034403	0.751121	YRI	AFR
4034573	0.24427	YRI	AFR
4034641	0.496006	YRI	AFR
4035068	-0.081402	YRI	AFR
4035366	-0.232866	YRI	AFR
4035462	0.517756	YRI	AFR
4035499	-0.372867	YRI	AFR
4035532	0.262697	YRI	AFR
4035583	-0.407236	YRI	AFR
4035774	0.23999	YRI	AFR
4035897	0.86317	YRI	AFR
4036286	-0.113826	YRI	AFR
4036523	0.0300188	YRI	AFR
4036608	-0.28592	YRI	AFR
4037038	0.0964096	YRI	AFR
4037394	0.224052	YRI	AFR
4037471	0.070278	YRI	AFR
4037906	-0.790743	YRI	AFR
4037918	-0.179018	YRI	AFR
4038012	0.12369	YRI	AFR
4038359	0.258716	YRI	AFR
4038387	0.250347	YRI	AFR
4038480	-0.788898	YRI	AFR
4038606	-0.041193	YRI	AFR
4039351	0.392504	YRI	AFR
4039379	-0.173299	YRI	AFR
4039383	0.614406	YRI	AFR
4039567	-0.764072	YRI	AFR
4039593	-0.0888409	YRI	AFR
4039828	-0.670291	YRI	AFR
4039968	0.526405	YRI	AFR
4040219	0.38402	YRI	AFR
4040360	0.977776	YRI	AFR
4040664	0.367635	YRI	AFR
4040770	0.249315	YRI	AFR
4041175	0.249315	YRI	AFR
4041560	-0.0472161	YRI	AFR
4041760	0.801115	YRI	AFR
4041995	-0.80534	YRI	AFR
4042449	0.345859	YRI	AFR
4042470	1.25765	YRI	AFR
4042471	0.993446	YRI	AFR
4042810	1.15786	YRI	AFR
4042995	0.339886	YRI	AFR
4043091	1.27438	YRI	AFR
4043175	1.89713	YRI	AFR
4043218	1.71161	YRI	AFR
4043980	1.16243	YRI	AFR
4045116	1.56575	YRI	AFR
4045272	-0.408708	YRI	AFR
4045367	1.23189	YRI	AFR
4046952	1.74269	YRI	AFR
4047118	2.23495	YRI	AFR
4047619	0.770604	YRI	AFR
4047746	1.21943	YRI	AFR
4048218	1.02881	YRI	AFR
4048602	0.395101	YRI	AFR
4048634	0.885737	YRI	AFR
4049365	0.568955	YRI	AFR
4049439	0.568955	YRI	AFR
4050383	0.240482	YRI	AFR
4051065	-0.145506	YRI	AFR
4051261	-0.0516497	YRI	AFR
4051513	-0.275953	YRI	AFR
4051832	0.351628	YRI	AFR
4052320	-0.346534	YRI	AFR
4052345	0.0508028	YRI	AFR
4052388	0.325102	YRI	AFR
4052486	0.15068	YRI	AFR
4052717	0.927998	YRI	AFR
4053329	0.323758	YRI	AFR
4053570	0.72957	YRI	AFR
4055224	-0.386625	YRI	AFR
4055431	0.588868	YRI	AFR
4056820	-0.0843113	YRI	AFR
4056927	0.0019452	YRI	AFR
4057144	0.452588	YRI	AFR
4057603	-0.99054	YRI	AFR
4057637	-0.166166	YRI	AFR
4057703	0.098511	YRI	AFR
4057744	0.145425	YRI	AFR
4057767	0.148804	YRI	AFR
4057778	0.138537	YRI	AFR
4057875	-0.376269	YRI	AFR
4057918	0.334729	YRI	AFR
4057983	0.198626	YRI	AFR
4058769	0.507351	YRI	AFR
4059401	0.123247	YRI	AFR
4059439	0.589903	YRI	AFR
4060301	0.64991	YRI	AFR
4060661	0.0606919	YRI	AFR
4060760	-0.414415	YRI	AFR
4060980	0.00770131	YRI	AFR
4061103	0.107037	YRI	AFR
4061616	0.696644	YRI	AFR
4061908	-0.376069	YRI	AFR
4061912	-0.376069	YRI	AFR
4062436	0.833086	YRI	AFR
4062592	0.833086	YRI	AFR
4063551	-0.0593887	YRI	AFR
4064326	1.37588	YRI	AFR
4064339	0.364013	YRI	AFR
4064368	0.364013	YRI	AFR
4064798	0.092162	YRI	AFR
4064996	0.484099	YRI	AFR
4065065	-0.874323	YRI	AFR
4065412	0.141857	YRI	AFR
4065495	0.270246	YRI	AFR
4065583	0.436485	YRI	AFR
4065677	-0.251793	YRI	AFR
4065736	-0.877332	YRI	AFR
4065743	0.0250779	YRI	AFR
4065992	-0.184719	YRI	AFR
4066061	1.41125	YRI	AFR
4066191	0.375792	YRI	AFR
4066435	0.402759	YRI	AFR
4066924	0.0406963	YRI	AFR
4066984	-0.0529812	YRI	AFR
4068237	0.762919	YRI	AFR
4068342	0.592623	YRI	AFR
4068374	0.552307	YRI	AFR
4068563	0.549707	YRI	AFR
4068798	0.0565564	YRI	AFR
4069987	0.783384	YRI	AFR
4070085	1.44548	YRI	AFR
4070433	1.20737	YRI	AFR
4071461	0.305077	YRI	AFR
4071929	-0.170732	YRI	AFR
4072538	0.185933	YRI	AFR
4072616	0.185933	YRI	AFR
4072774	0.187415	YRI	AFR
4073152	-0.329234	YRI	AFR
4073670	0.852098	YRI	AFR
4074258	0.357399	YRI	AFR
4074304	0.762092	YRI	AFR
4074908	0.762092	YRI	AFR
4075152	-0.118245	YRI	AFR
4075656	0.239436	YRI	AFR
4075912	1.1069	YRI	AFR
4076047	1.1069	YRI	AFR
4076094	1.20525	YRI	AFR
4076136	-0.332176	YRI	AFR
4076470	0.515935	YRI	AFR
4076676	1.63437	YRI	AFR
4076752	0.46366	YRI	AFR
4076830	2.06824	YRI	AFR
4077138	0.544746	YRI	AFR
4077178	1.07988	YRI	AFR
4077442	1.84342	YRI	AFR
4077461	-1.03453	YRI	AFR
4077605	2.67572	YRI	AFR
4077818	2.709	YRI	AFR
4078247	2.64566	YRI	AFR
4078478	2.68273	YRI	AFR
4078516	2.5068	YRI	AFR
4078744	2.57525	YRI	AFR
4079531	-1.858	YRI	AFR
4079538	1.78779	YRI	AFR
4079618	-1.74375	YRI	AFR
4080013	-1.78092	YRI	AFR
4080385	0.674522	YRI	AFR
4080757	1.58003	YRI	AFR
4081033	1.57966	YRI	AFR
4081138	0.554827	YRI	AFR
4081417	0.995766	YRI	AFR
4082254	1.01133	YRI	AFR
4082659	-0.285834	YRI	AFR
4082699	-0.475073	YRI	AFR
4083105	-0.052251	YRI	AFR
4083361	-0.55628	YRI	AFR
4083527	0.238607	YRI	AFR
4084210	0.55312	YRI	AFR
4084253	0.973453	YRI	AFR
4084496	0.60961	YRI	AFR
4084818	0.354114	YRI	AFR
4085545	0.2685	YRI	AFR
4086533	0.245968	YRI	AFR
4086861	0.24516	YRI	AFR
4086874	0.16428	YRI	AFR
4087211	-0.220741	YRI	AFR
4087512	-0.16679	YRI	AFR
4087976	-0.481365	YRI	AFR
4088191	-0.27691	YRI	AFR
4088559	0.175877	YRI	AFR
4088776	0.0960128	YRI	AFR
4089074	0.342279	YRI	AFR
4089231	0.232	YRI	AFR
4089793	0.11018	YRI	AFR
4090819	0.308627	YRI	AFR
4090835	0.184275	YRI	AFR
4091131	0.18893	YRI	AFR
4091807	-2.01607	YRI	AFR
4091830	0.259438	YRI	AFR
4091831	0.259438	YRI	AFR
4091955	0.829695	YRI	AFR
4091994	-0.732757	YRI	AFR
4092053	-0.528669	YRI	AFR
4092081	-0.528669	YRI	AFR
4092082	0.828382	YRI	AFR
4092145	-0.549555	YRI	AFR
4092146	0.32122	YRI	AFR
4092171	0.81327	YRI	AFR
4092480	-0.700283	YRI	AFR
4093048	0.968247	YRI	AFR
4093105	-0.533665	YRI	AFR
4093226	0.817452	YRI	AFR
4093275	-1.05614	YRI	AFR
4093287	-0.138069	YRI	AFR
4093390	-0.473325	YRI	AFR
4093511	-0.472332	YRI	AFR
4093567	0.776947	YRI	AFR
4093615	0.776947	YRI	AFR
4093648	-0.557172	YRI	AFR
4093664	-0.459027	YRI	AFR
4093769	0.7648	YRI	AFR
4094157	0.764521	YRI	AFR
4094328	-0.695887	YRI	AFR
4094479	0.416442	YRI	AFR
4094794	-0.435915	YRI	AFR
4094803	-1.07198	YRI	AFR
4094844	-0.683806	YRI	AFR
4094953	1.74005	YRI	AFR
4095126	-0.469889	YRI	AFR
4095234	-1.00998	YRI	AFR
4095679	-1.52575	YRI	AFR
4095762	-0.449344	YRI	AFR
4095809	1.706	YRI	AFR
4095988	-1.01725	YRI	AFR
4096325	-1.01702	YRI	AFR
4096368	1.70565	YRI	AFR
4096394	-0.506862	YRI	AFR
4096485	-1.02842	YRI	AFR
4096511	0.270622	YRI	AFR
4096541	1.1938	YRI	AFR
4096542	1.1938	YRI	AFR
4096586	-1.0354	YRI	AFR
4096952	1.71485	YRI	AFR
4097071	-1.51267	YRI	AFR
4097098	-0.55695	YRI	AFR
4097222	-0.616282	YRI	AFR
4097260	-0.520225	YRI	AFR
4097579	-0.839003	YRI	AFR
4097824	-1.30813	YRI	AFR
4098305	1.27514	YRI	AFR
4098582	-1.1655	YRI	AFR
4098661	1.28425	YRI	AFR
4098784	0.755404	YRI	AFR
4098985	-0.581271	YRI	AFR
4099001	0.487117	YRI	AFR
4099981	0.169267	YRI	AFR
4100268	0.270242	YRI	AFR
4100353	0.290905	YRI	AFR
4100354	-0.69384	YRI	AFR
4100545	-0.0716397	YRI	AFR
4100583	0.743055	YRI	AFR
4100900	0.5488	YRI	AFR
4101083	0.246662	YRI	AFR
4101175	-0.663613	YRI	AFR
4101243	0.0570471	YRI	AFR
4101300	0.0570471	YRI	AFR
4101386	0.231232	YRI	AFR
4101660	0.586526	YRI	AFR
4102069	0.388784	YRI	AFR
4102082	0.249457	YRI	AFR
4102864	-0.275189	YRI	AFR
4103022	0.554299	YRI	AFR
4103520	0.645792	YRI	AFR
4103871	-0.262702	YRI	AFR
4103882	0.0715296	YRI	AFR
4104299	-0.307091	YRI	AFR
4104512	0.316005	YRI	AFR
4104586	0.136555	YRI	AFR
4104697	0.873807	YRI	AFR
4105641	0.547922	YRI	AFR
4106788	1.45049	YRI	AFR
4106789	2.01767	YRI	AFR
4107142	1.26105	YRI	AFR
4107245	1.55174	YRI	AFR
4107990	1.03072	YRI	AFR
4108115	0.946468	YRI	AFR
4108603	0.200755	YRI	AFR
4108708	0.468301	YRI	AFR
4108907	-0.770125	YRI	AFR
4109409	-0.80044	YRI	AFR
4109534	-0.489443	YRI	AFR
4109594	0.536025	YRI	AFR
4109664	0.536025	YRI	AFR
4109825	0.294532	YRI	AFR
4110036	-0.459036	YRI	AFR
4110127	-0.928269	YRI	AFR
4110193	0.0979346	YRI	AFR
4110750	0.105159	YRI	AFR
4111525	-0.678038	YRI	AFR
4113236	0.6571	YRI	AFR
4114709	0.198782	YRI	AFR
4115028	0.28386	YRI	AFR
4115493	-0.115176	YRI	AFR
4115728	-0.30727	YRI	AFR
4116588	-0.829132	YRI	AFR
4117429	0.411253	YRI	AFR
4117930	0.520722	YRI	AFR
4118391	-0.0110883	YRI	AFR
4118462	-0.0110883	YRI	AFR
4118690	0.225217	YRI	AFR
4118878	0.012056	YRI	AFR
4120076	0.208135	YRI	AFR
4120121	-0.0450304	YRI	AFR
4120857	0.945637	YRI	AFR
4121921	0.112972	YRI	AFR
4122223	0.406946	YRI	AFR
4122923	-0.383904	YRI	AFR
4123323	1.01778	YRI	AFR
4123420	1.01778	YRI	AFR
4123585	-0.827571	YRI	AFR
4123633	1.01218	YRI	AFR
4124107	1.0143	YRI	AFR
4124280	-0.1202	YRI	AFR
4124300	1.08379	YRI	AFR
4124590	-0.35324	YRI	AFR
4125824	0.0359904	YRI	AFR
4126201	-0.317685	YRI	AFR
4126202	-0.239941	YRI	AFR
4126531	0.938259	YRI	AFR
4126976	-0.321473	YRI	AFR
4127276	1.12703	YRI	AFR
4128400	-1.10987	YRI	AFR
4128516	-0.32459	YRI	AFR
4128563	-0.243832	YRI	AFR
4128581	-0.159626	YRI	AFR
4128631	-0.216194	YRI	AFR
4128641	1.17036	YRI	AFR
4128843	0.789749	YRI	AFR
4128953	-1.09149	YRI	AFR
4129753	-1.30162	YRI	AFR
4129915	0.159781	YRI	AFR
4130193	-2.39866	YRI	AFR
4130204	-0.0338677	YRI	AFR
4130444	-1.32268	YRI	AFR
4131838	0.935649	YRI	AFR
4131883	-1.11308	YRI	AFR
4131898	-0.274645	YRI	AFR
4132777	0.872888	YRI	AFR
4133013	1.64286	YRI	AFR
4133033	-0.86847	YRI	AFR
4133076	1.64348	YRI	AFR
4133618	-2.14153	YRI	AFR
4133821	-1.5919	YRI	AFR
4134162	1.48949	YRI	AFR
4134246	1.44311	YRI	AFR
4134659	-2.07791	YRI	AFR
4134815	-1.41966	YRI	AFR
4135260	-0.30188	YRI	AFR
4135294	1.43195	YRI	AFR
4135295	2.05997	YRI	AFR
4135350	-0.563881	YRI	AFR
4135418	-0.448429	YRI	AFR
4135562	-0.586862	YRI	AFR
4135758	-1.14318	YRI	AFR
4135898	-0.253634	YRI	AFR
4136157	-0.933329	YRI	AFR
4136172	-1.38846	YRI	AFR
4136266	-1.23518	YRI	AFR
4136418	-0.711405	YRI	AFR
4136727	0.162428	YRI	AFR
4136871	0.42719	YRI	AFR
4137019	-2.46347	YRI	AFR
4137179	-0.468768	YRI	AFR
4137262	0.402964	YRI	AFR
4137329	-0.369911	YRI	AFR
4137856	0.345766	YRI	AFR
4138378	-0.924819	YRI	AFR
4138473	2.50988	YRI	AFR
4138477	-1.80182	YRI	AFR
4139156	-0.335202	YRI	AFR
4139364	-0.925089	YRI	AFR
4139419	-0.246151	YRI	AFR
4140188	-0.773144	YRI	AFR
4140298	0.132202	YRI	AFR
4140459	-1.79613	YRI	AFR
4141127	-0.555792	YRI	AFR
4141231	-0.398068	YRI	AFR
4141277	0.362233	YRI	AFR
4141728	0.265546	YRI	AFR
4141788	-0.521912	YRI	AFR
4142492	-0.760678	YRI	AFR
4143181	-1.23435	YRI	AFR
4145141	-1.47869	YRI	AFR
4145164	0.269877	YRI	AFR
4145949	-1.52483	YRI	AFR
4146695	0.486818	YRI	AFR
4147180	-0.00857326	YRI	AFR
4147523	0.207979	YRI	AFR
4147630	-0.365485	YRI	AFR
4148407	0.524681	YRI	AFR
4148434	-0.358641	YRI	AFR
4148478	0.214149	YRI	AFR
4148617	-1.94266	YRI	AFR
4148689	-0.304339	YRI	AFR
4149095	-0.724766	YRI	AFR
4149131	-1.48023	YRI	AFR
4149175	-0.283823	YRI	AFR
4149229	-0.621566	YRI	AFR
4149541	-0.614614	YRI	AFR
4150427	0.667794	YRI	AFR
4150448	0.350795	YRI	AFR
4150479	-1.56321	YRI	AFR
4151587	-0.228104	YRI	AFR
4151597	0.613652	YRI	AFR
4151999	-1.45289	YRI	AFR
4152190	0.673372	YRI	AFR
4152718	0.456005	YRI	AFR
4153153	-1.38558	YRI	AFR
4153161	-0.542472	YRI	AFR
4153178	-0.736997	YRI	AFR
4153389	-1.35738	YRI	AFR
4153524	0.619832	YRI	AFR
4154338	0.724656	YRI	AFR
4154536	0.483794	YRI	AFR
4154551	1.34299	YRI	AFR
4154851	-1.12752	YRI	AFR
4155082	-0.00460078	YRI	AFR
4155419	1.06359	YRI	AFR
4155538	-0.451445	YRI	AFR
4155599	0.962784	YRI	AFR
4155608	-0.36296	YRI	AFR
4155763	-0.142299	YRI	AFR
4155781	-0.25214	YRI	AFR
4156423	0.497532	YRI	AFR
4156535	-1.19931	YRI	AFR
4156857	-0.754304	YRI	AFR
4157696	0.18194	YRI	AFR
4157869	0.387921	YRI	AFR
4158668	0.394789	YRI	AFR
4160146	0.186358	YRI	AFR
4160370	0.204273	YRI	AFR
4160538	-0.141555	YRI	AFR
4161793	1.27952	YRI	AFR
4162760	-0.0478793	YRI	AFR
4165817	0.423293	YRI	AFR
4012825	1.12308	LWK	AFR
4013144	-0.562102	LWK	AFR
4013467	1.49104	LWK	AFR
4014141	-0.853655	LWK	AFR
4014245	0.651168	LWK	AFR
4014770	-1.26762	LWK	AFR
4014922	0.525397	LWK	AFR
4014964	0.877965	LWK	AFR
4014982	2.06286	LWK	AFR
4015313	-1.22777	LWK	AFR
4015316	1.88602	LWK	AFR
4015729	-0.911699	LWK	AFR
4016676	0.794843	LWK	AFR
4016943	1.84084	LWK	AFR
4017270	-1.55566	LWK	AFR
4017278	-1.16592	LWK	AFR
4017534	-1.00296	LWK	AFR
4017685	1.60884	LWK	AFR
4018425	-1.26068	LWK	AFR
4018878	0.339069	LWK	AFR
4019123	0.0249999	LWK	AFR
4019350	0.89323	LWK	AFR
4019530	-1.28227	LWK	AFR
4019854	-0.227687	LWK	AFR
4020372	0.128551	LWK	AFR
4020391	-1.41192	LWK	AFR
4021051	0.616177	LWK	AFR
4021411	-1.29649	LWK	AFR
4021734	0.644502	LWK	AFR
4022167	-1.66353	LWK	AFR
4022638	-0.175318	LWK	AFR
4022694	0.512357	LWK	AFR
4022703	0.373619	LWK	AFR
4023022	0.146379	LWK	AFR
4023504	0.434607	LWK	AFR
4023553	0.76629	LWK	AFR
4024446	0.00834029	LWK	AFR
4024565	0.242152	LWK	AFR
4025162	-0.8479	LWK	AFR
4025385	0.162309	LWK	AFR
4026238	-0.568738	LWK	AFR
4026720	0.296649	LWK	AFR
4027147	0.387741	LWK	AFR
4027399	-0.832425	LWK	AFR
4027410	0.0416063	LWK	AFR
4027423	0.18124	LWK	AFR
4027434	-0.487868	LWK	AFR
4027605	-0.0652218	LWK	AFR
4027688	0.107022	LWK	AFR
4027749	0.00875565	LWK	AFR
4027780	-0.0229303	LWK	AFR
4027876	0.00533156	LWK	AFR
4028015	0.396099	LWK	AFR
4028060	-0.00301218	LWK	AFR
4028076	-0.0283976	LWK	AFR
4028145	1.2781	LWK	AFR
4028417	0.811815	LWK	AFR
4028823	0.0544047	LWK	AFR
4028831	-0.0821719	LWK	AFR
4028866	-1.00605	LWK	AFR
4028877	0.654709	LWK	AFR
4029577	-0.545567	LWK	AFR
4030795	0.801838	LWK	AFR
4030928	-1.23161	LWK	AFR
4031140	-1.22454	LWK	AFR
4031348	0.568173	LWK	AFR
4031793	-0.0578563	LWK	AFR
4031794	0.250608	LWK	AFR
4032021	-0.616119	LWK	AFR
4032489	0.113089	LWK	AFR
4032581	0.548591	LWK	AFR
4032716	0.174739	LWK	AFR
4032802	0.977707	LWK	AFR
4033012	-0.0766339	LWK	AFR
4033054	-0.950926	LWK	AFR
4033522	-0.00421153	LWK	AFR
4033729	1.22301	LWK	AFR
4033987	0.701239	LWK	AFR
4034001	0.804868	LWK	AFR
4034067	1.32429	LWK	AFR
4034403	1.03418	LWK	AFR
4034641	0.254257	LWK	AFR
4035068	0.971642	LWK	AFR
4035366	0.025237	LWK	AFR
4035462	0.614447	LWK	AFR
4035499	-0.161893	LWK	AFR
4035532	-0.646828	LWK	AFR
4035583	-0.336053	LWK	AFR
4035735	1.03916	LWK	AFR
4035774	-0.38954	LWK	AFR
4035777	0.762052	LWK	AFR
4035897	0.427216	LWK	AFR
4036067	0.297806	LWK	AFR
4036286	-0.16545	LWK	AFR
4036523	-0.663693	LWK	AFR
4036608	-0.40679	LWK	AFR
4037038	-0.54599	LWK	AFR
4037394	0.695884	LWK	AFR
4037448	0.748155	LWK	AFR
4037471	-0.921998	LWK	AFR
4037832	-0.186164	LWK	AFR
4037906	0.0622054	LWK	AFR
4037918	0.623124	LWK	AFR
4038040	0.286222	LWK	AFR
4038359	0.371169	LWK	AFR
4038387	0.396877	LWK	AFR
4038480	-0.0857707	LWK	AFR
4038606	-1.42567	LWK	AFR
4038801	0.641792	LWK	AFR
4038906	0.334228	LWK	AFR
4039351	0.34821	LWK	AFR
4039379	-0.0706452	LWK	AFR
4039383	-1.05278	LWK	AFR
4039567	-0.489422	LWK	AFR
4039593	-0.396	LWK	AFR
4039828	0.0746256	LWK	AFR
4039968	-0.351623	LWK	AFR
4040219	0.218812	LWK	AFR
4040360	0.414349	LWK	AFR
4040664	0.168186	LWK	AFR
4040770	-0.820572	LWK	AFR
4041175	-0.790328	LWK	AFR
4041760	0.785643	LWK	AFR
4041995	-0.375995	LWK	AFR
4042449	-0.017934	LWK	AFR
4042470	-0.053054	LWK	AFR
4042471	0.0385403	LWK	AFR
4042533	0.847213	LWK	AFR
4042810	0.678212	LWK	AFR
4042995	1.574	LWK	AFR
4043091	0.791082	LWK	AFR
4043099	-0.828783	LWK	AFR
4043175	0.17307	LWK	AFR
4043218	0.702112	LWK	AFR
4043980	0.736368	LWK	AFR
4044038	1.10311	LWK	AFR
4044479	1.59959	LWK	AFR
4045116	0.608225	LWK	AFR
4045272	0.286483	LWK	AFR
4045367	0.483153	LWK	AFR
4046877	1.64609	LWK	AFR
4046952	1.83083	LWK	AFR
4047118	1.16316	LWK	AFR
4047619	1.00134	LWK	AFR
4047746	1.01285	LWK	AFR
4048218	1.3059	LWK	AFR
4048602	0.614532	LWK	AFR
4048634	0.869145	LWK	AFR
4049365	0.147489	LWK	AFR
4049439	0.147489	LWK	AFR
4050383	0.691693	LWK	AFR
4051065	1.14038	LWK	AFR
4051261	0.0790521	LWK	AFR
4051513	0.584624	LWK	AFR
4051531	0.275079	LWK	AFR
4051832	0.881289	LWK	AFR
4052320	-0.44504	LWK	AFR
4052345	0.202637	LWK	AFR
4052388	0.831333	LWK	AFR
4052486	0.0308666	LWK	AFR
4052717	0.132258	LWK	AFR
4053329	0.813336	LWK	AFR
4053570	0.0217618	LWK	AFR
4053581	0.353401	LWK	AFR
4055224	-0.448762	LWK	AFR
4055431	-0.303133	LWK	AFR
4056820	0.735205	LWK	AFR
4056927	0.589481	LWK	AFR
4057144	-0.583338	LWK	AFR
4057603	-0.916843	LWK	AFR
4057637	0.101559	LWK	AFR
4057703	0.750264	LWK	AFR
4057744	0.750264	LWK	AFR
4057767	0.72994	LWK	AFR
4057778	0.750094	LWK	AFR
4057875	-0.627904	LWK	AFR
4057918	-0.53931	LWK	AFR
4057983	0.783729	LWK	AFR
4058769	-0.240747	LWK	AFR
4059401	0.858253	LWK	AFR
4059439	-0.548933	LWK	AFR
4060301	-0.1918	LWK	AFR
4060661	0.480394	LWK	AFR
4060760	-0.644355	LWK	AFR
4060980	0.494217	LWK	AFR
4061080	0.339048	LWK	AFR
4061103	0.803976	LWK	AFR
4061616	-0.255511	LWK	AFR
4061811	0.445849	LWK	AFR
4061908	-0.648623	LWK	AFR
4061912	-0.648623	LWK	AFR
4062367	-0.00489062	LWK	AFR
4062436	-0.30082	LWK	AFR
4062592	-0.30082	LWK	AFR
4063551	0.357785	LWK	AFR
4064326	-0.174275	LWK	AFR
4064339	0.0956707	LWK	AFR
4064368	0.0899283	LWK	AFR
4064798	0.301858	LWK	AFR
4064996	-0.487862	LWK	AFR
4065065	-0.439568	LWK	AFR
4065412	0.101349	LWK	AFR
4065495	-0.0330388	LWK	AFR
4065583	-0.289761	LWK	AFR
4065643	0.0293055	LWK	AFR
4065677	-0.0355507	LWK	AFR
4065736	-0.312215	LWK	AFR
4065743	-0.335119	LWK	AFR
4065992	0.112009	LWK	AFR
4066061	0.903262	LWK	AFR
4066191	0.166136	LWK	AFR
4066423	0.223016	LWK	AFR
4066435	0.235131	LWK	AFR
4066924	-0.505693	LWK	AFR
4066984	-0.56143	LWK	AFR
4068039	0.25273	LWK	AFR
4068147	0.241265	LWK	AFR
4068237	-0.681571	LWK	AFR
4068342	0.327932	LWK	AFR
4068344	0.236016	LWK	AFR
4068374	0.28582	LWK	AFR
4068563	0.106971	LWK	AFR
4068798	-0.51966	LWK	AFR
4068814	0.257541	LWK	AFR
4068920	-0.0168015	LWK	AFR
4069987	0.00386198	LWK	AFR
4070080	0.527954	LWK	AFR
4070085	0.312554	LWK	AFR
4070433	-0.468636	LWK	AFR
4070475	0.436792	LWK	AFR
4070586	0.436792	LWK	AFR
4071461	-0.161647	LWK	AFR
4071550	0.00743721	LWK	AFR
4071745	0.232941	LWK	AFR
4071929	0.230183	LWK	AFR
4072538	-0.246317	LWK	AFR
4072616	-0.246317	LWK	AFR
4072681	-0.00503251	LWK	AFR
4072774	-0.207213	LWK	AFR
4073152	-0.38556	LWK	AFR
4073670	0.916577	LWK	AFR
4074258	-0.0239363	LWK	AFR
4074304	0.71818	LWK	AFR
4074908	0.711285	LWK	AFR
4075152	-0.119565	LWK	AFR
4075505	0.779812	LWK	AFR
4075656	0.0852377	LWK	AFR
4075912	0.758982	LWK	AFR
4076047	0.775185	LWK	AFR
4076094	-0.174748	LWK	AFR
4076136	-0.302993	LWK	AFR
4076470	0.582236	LWK	AFR
4076676	1.40681	LWK	AFR
4076752	0.0564413	LWK	AFR
4076830	1.92708	LWK	AFR
4077138	0.683868	LWK	AFR
4077178	1.89637	LWK	AFR
4077442	1.40813	LWK	AFR
4077461	-0.582894	LWK	AFR
4077605	2.47578	LWK	AFR
4077818	1.93687	LWK	AFR
4077951	2.00416	LWK	AFR
4078247	1.41313	LWK	AFR
4078478	1.44015	LWK	AFR
4078516	1.38534	LWK	AFR
4078744	1.932	LWK	AFR
4078878	1.74133	LWK	AFR
4079531	-0.236007	LWK	AFR
4079618	-0.281162	LWK	AFR
4080013	-1.38199	LWK	AFR
4080757	0.386808	LWK	AFR
4081033	0.383309	LWK	AFR
4081138	0.276005	LWK	AFR
4081417	-0.12289	LWK	AFR
4082254	-0.124101	LWK	AFR
4082659	0.212741	LWK	AFR
4082699	0.756844	LWK	AFR
4083105	-0.114428	LWK	AFR
4083361	-0.369159	LWK	AFR
4083811	-0.403876	LWK	AFR
4084210	0.28578	LWK	AFR
4084253	0.938745	LWK	AFR
4084496	-0.456243	LWK	AFR
4085545	0.0475309	LWK	AFR
4086533	-0.788107	LWK	AFR
4086861	0.17969	LWK	AFR
4086874	-0.926772	LWK	AFR
4087512	-0.00526801	LWK	AFR
4087976	0.715881	LWK	AFR
4088191	-0.514202	LWK	AFR
4088559	-0.967452	LWK	AFR
4088776	1.15467	LWK	AFR
4089074	0.33967	LWK	AFR
4089231	0.617174	LWK	AFR
4089641	-0.911476	LWK	AFR
4089793	1.43101	LWK	AFR
4090819	0.145108	LWK	AFR
4091131	0.397359	LWK	AFR
4091807	-1.14699	LWK	AFR
4091830	1.6699	LWK	AFR
4091831	1.6699	LWK	AFR
4091955	1.73493	LWK	AFR
4092053	-1.25487	LWK	AFR
4092081	-1.25487	LWK	AFR
4092082	1.73996	LWK	AFR
4092145	-0.963396	LWK	AFR
4092146	0.176399	LWK	AFR
4092171	1.7997	LWK	AFR
4092480	-1.2876	LWK	AFR
4092901	-1.64095	LWK	AFR
4093048	1.82442	LWK	AFR
4093105	-1.80838	LWK	AFR
4093226	2.44158	LWK	AFR
4093287	-0.490058	LWK	AFR
4093390	-2.05181	LWK	AFR
4093511	-2.05005	LWK	AFR
4093567	2.54087	LWK	AFR
4093615	2.54087	LWK	AFR
4093648	-1.92054	LWK	AFR
4093664	-1.87213	LWK	AFR
4093769	2.36167	LWK	AFR
4094157	2.36024	LWK	AFR
4094328	-1.51997	LWK	AFR
4094479	0.0793622	LWK	AFR
4094794	-1.39359	LWK	AFR
4094803	-1.59963	LWK	AFR
4094844	-1.08443	LWK	AFR
4094953	2.14973	LWK	AFR
4095126	-1.94772	LWK	AFR
4095234	-1.54931	LWK	AFR
4095679	-1.41655	LWK	AFR
4095762	-1.9109	LWK	AFR
4095809	2.10661	LWK	AFR
4095821	-0.902534	LWK	AFR
4095822	-0.902534	LWK	AFR
4095988	-1.50854	LWK	AFR
4096325	-1.50951	LWK	AFR
4096368	2.06563	LWK	AFR
4096485	-1.51646	LWK	AFR
4096511	-0.138667	LWK	AFR
4096541	1.60721	LWK	AFR
4096542	1.60721	LWK	AFR
4096586	-1.44908	LWK	AFR
4096952	2.00679	LWK	AFR
4097071	-1.30708	LWK	AFR
4097222	-1.36537	LWK	AFR
4097260	-0.840274	LWK	AFR
4097579	-1.20647	LWK	AFR
4098305	1.63307	LWK	AFR
4098582	-0.782505	LWK	AFR
4098661	1.63796	LWK	AFR
4098784	1.27362	LWK	AFR
4098985	-1.04562	LWK	AFR
4099001	0.256186	LWK	AFR
4099981	-1.20442	LWK	AFR
4100268	0.0998839	LWK	AFR
4100353	1.53299	LWK	AFR
4100354	-0.0408108	LWK	AFR
4100545	-0.025522	LWK	AFR
4100583	0.967307	LWK	AFR
4100900	0.231887	LWK	AFR
4101083	0.0558577	LWK	AFR
4101175	-0.0534549	LWK	AFR
4101243	0.166279	LWK	AFR
4101300	0.219859	LWK	AFR
4101386	0.0257473	LWK	AFR
4101660	0.387936	LWK	AFR
4102069	-0.33251	LWK	AFR
4102082	0.404076	LWK	AFR
4102826	0.506458	LWK	AFR
4102864	0.297609	LWK	AFR
4103472	0.544408	LWK	AFR
4103520	0.579331	LWK	AFR
4103871	-0.251716	LWK	AFR
4103882	0.167453	LWK	AFR
4104299	-0.291713	LWK	AFR
4104472	0.356878	LWK	AFR
4104512	-0.461129	LWK	AFR
4104586	0.254975	LWK	AFR
4104697	0.825342	LWK	AFR
4105641	-0.435638	LWK	AFR
4106788	0.648192	LWK	AFR
4106789	1.24707	LWK	AFR
4107142	0.629807	LWK	AFR
4107245	0.00531616	LWK	AFR
4107726	0.295891	LWK	AFR
4107990	0.155043	LWK	AFR
4108115	0.617773	LWK	AFR
4108603	0.0993163	LWK	AFR
4108708	-0.478037	LWK	AFR
4108907	-0.293267	LWK	AFR
4109409	-0.378678	LWK	AFR
4109534	0.086944	LWK	AFR
4109594	0.231917	LWK	AFR
4109664	0.231917	LWK	AFR
4109825	-0.441395	LWK	AFR
4110036	-0.164924	LWK	AFR
4110127	-0.802585	LWK	AFR
4110193	0.624669	LWK	AFR
4110750	-0.0468326	LWK	AFR
4111525	0.181905	LWK	AFR
4113236	0.187817	LWK	AFR
4113505	-0.0588714	LWK	AFR
4114709	0.292911	LWK	AFR
4115028	-0.454057	LWK	AFR
4115493	0.315615	LWK	AFR
4115728	-0.12816	LWK	AFR
4116588	-0.206559	LWK	AFR
4117286	-0.469271	LWK	AFR
4117429	-0.823688	LWK	AFR
4117930	-0.83995	LWK	AFR
4118391	0.372819	LWK	AFR
4118462	0.372819	LWK	AFR
4118690	-1.63942	LWK	AFR
4118878	0.409974	LWK	AFR
4120076	0.408481	LWK	AFR
4120121	-0.0464701	LWK	AFR
4120857	-0.0504858	LWK	AFR
4121921	0.495607	LWK	AFR
4122223	0.588808	LWK	AFR
4122923	-0.209386	LWK	AFR
4123323	1.30708	LWK	AFR
4123420	1.36549	LWK	AFR
4123585	-0.788478	LWK	AFR
4123633	1.36168	LWK	AFR
4124107	1.36168	LWK	AFR
4124280	-1.30727	LWK	AFR
4124300	1.38669	LWK	AFR
4124590	-0.808132	LWK	AFR
4125824	-1.19859	LWK	AFR
4126201	-0.272731	LWK	AFR
4126202	-0.589957	LWK	AFR
4126531	0.194384	LWK	AFR
4126976	0.284376	LWK	AFR
4127276	1.10429	LWK	AFR
4128400	-0.665889	LWK	AFR
4128516	0.219939	LWK	AFR
4128563	1.35964	LWK	AFR
4128581	0.215051	LWK	AFR
4128631	0.215051	LWK	AFR
4128641	-0.776108	LWK	AFR
4128843	0.331086	LWK	AFR
4129915	0.158439	LWK	AFR
4130193	-0.890037	LWK	AFR
4130204	0.0915553	LWK	AFR
4130444	-0.483505	LWK	AFR
4131838	0.928045	LWK	AFR
4131883	-0.536948	LWK	AFR
4131898	-0.121113	LWK	AFR
4132309	-1.60319	LWK	AFR
4132777	-0.634542	LWK	AFR
4132922	-0.973936	LWK	AFR
4133013	0.753529	LWK	AFR
4133033	-0.0438841	LWK	AFR
4133076	0.753529	LWK	AFR
4133618	-1.37776	LWK	AFR
4133821	-1.09617	LWK	AFR
4134162	0.650068	LWK	AFR
4134246	0.661324	LWK	AFR
4134659	-1.36935	LWK	AFR
4134815	-1.10526	LWK	AFR
4135260	-0.221838	LWK	AFR
4135294	0.632752	LWK	AFR
4135295	1.48883	LWK	AFR
4135350	-0.0920219	LWK	AFR
4135418	-0.0376612	LWK	AFR
4135562	-1.1331	LWK	AFR
4135758	-1.46309	LWK	AFR
4135898	-0.747049	LWK	AFR
4136157	-0.504209	LWK	AFR
4136172	-1.01973	LWK	AFR
4136418	-1.00282	LWK	AFR
4136727	-0.419512	LWK	AFR
4136871	0.187427	LWK	AFR
4137179	-1.41	LWK	AFR
4137262	0.0903261	LWK	AFR
4137329	-1.31883	LWK	AFR
4137856	-1.6233	LWK	AFR
4138473	1.47679	LWK	AFR
4138477	-0.845584	LWK	AFR
4139156	-1.2171	LWK	AFR
4139364	-0.687505	LWK	AFR
4139419	-0.723428	LWK	AFR
4140188	-0.60016	LWK	AFR
4140298	-0.337066	LWK	AFR
4140459	-0.865681	LWK	AFR
4141127	-0.437251	LWK	AFR
4141231	-1.41458	LWK	AFR
4141277	-0.0611945	LWK	AFR
4141728	-0.89799	LWK	AFR
4141788	-0.427795	LWK	AFR
4142492	-0.484701	LWK	AFR
4143181	-0.833906	LWK	AFR
4145141	-0.730917	LWK	AFR
4145164	0.243762	LWK	AFR
4145949	-0.853802	LWK	AFR
4146695	0.130001	LWK	AFR
4147180	-0.659038	LWK	AFR
4148204	-1.21812	LWK	AFR
4148407	-0.320332	LWK	AFR
4148434	-0.8341	LWK	AFR
4148478	-1.49842	LWK	AFR
4148689	-0.810324	LWK	AFR
4149095	-0.315366	LWK	AFR
4149131	-1.20992	LWK	AFR
4149175	-0.803401	LWK	AFR
4150427	-1.40183	LWK	AFR
4150448	-0.850836	LWK	AFR
4150479	-0.983822	LWK	AFR
4150609	-1.17519	LWK	AFR
4151587	-0.781784	LWK	AFR
4151597	-1.49911	LWK	AFR
4151999	-1.1788	LWK	AFR
4152190	0.0646498	LWK	AFR
4152718	-0.720351	LWK	AFR
4153153	-0.958959	LWK	AFR
4153161	-0.386216	LWK	AFR
4153178	-0.374255	LWK	AFR
4153200	-1.03149	LWK	AFR
4153389	-0.805232	LWK	AFR
4153524	-0.340106	LWK	AFR
4154338	-0.247991	LWK	AFR
4154536	0.108293	LWK	AFR
4154551	0.0486149	LWK	AFR
4154552	-0.0901729	LWK	AFR
4154851	-0.613013	LWK	AFR
4155082	0.889004	LWK	AFR
4155419	0.690928	LWK	AFR
4155538	-0.211117	LWK	AFR
4155599	0.494392	LWK	AFR
4155608	0.221936	LWK	AFR
4155763	0.38343	LWK	AFR
4156423	0.624043	LWK	AFR
4156535	-0.184836	LWK	AFR
4156857	-0.0446154	LWK	AFR
4157696	-0.0614975	LWK	AFR
4157869	0.391599	LWK	AFR
4160370	0.85983	LWK	AFR
4160538	-0.00949878	LWK	AFR
4161793	0.698666	LWK	AFR
4162526	-1.07491	LWK	AFR
4162760	-0.354494	LWK	AFR
4165817	-0.473426	LWK	AFR
4012825	1.77118	GWD	AFR
4013144	0.621548	GWD	AFR
4013467	0.40567	GWD	AFR
4013556	1.32837	GWD	AFR
4014141	-0.186633	GWD	AFR
4014245	-0.549286	GWD	AFR
4014770	-0.809462	GWD	AFR
4014964	-0.0175432	GWD	AFR
4014982	1.453	GWD	AFR
4015313	-0.140871	GWD	AFR
4015316	0.820085	GWD	AFR
4015729	0.206337	GWD	AFR
4016355	0.869846	GWD	AFR
4016676	-0.532424	GWD	AFR
4016943	1.00608	GWD	AFR
4017270	-0.842941	GWD	AFR
4017278	-0.451397	GWD	AFR
4017534	-0.113916	GWD	AFR
4017685	0.587015	GWD	AFR
4018031	0.573254	GWD	AFR
4018321	0.5635	GWD	AFR
4018425	-0.549426	GWD	AFR
4018431	0.528615	GWD	AFR
4019114	0.54645	GWD	AFR
4019123	0.379605	GWD	AFR
4019216	0.488246	GWD	AFR
4019350	0.26292	GWD	AFR
4019530	0.115788	GWD	AFR
4020391	-0.912833	GWD	AFR
4020579	-0.131988	GWD	AFR
4020732	-0.275964	GWD	AFR
4021051	-0.978208	GWD	AFR
4021411	-0.603607	GWD	AFR
4021734	-1.13449	GWD	AFR
4021803	-0.0222785	GWD	AFR
4022067	-0.178922	GWD	AFR
4022159	-0.178922	GWD	AFR
4022167	-0.656795	GWD	AFR
4022638	-0.120357	GWD	AFR
4022694	-0.554603	GWD	AFR
4022703	-0.621427	GWD	AFR
4023022	0.576878	GWD	AFR
4023553	0.275702	GWD	AFR
4024128	-0.125819	GWD	AFR
4024446	-0.290377	GWD	AFR
4025385	-0.0759869	GWD	AFR
4026238	-0.313039	GWD	AFR
4026720	0.23238	GWD	AFR
4027147	0.490236	GWD	AFR
4027399	0.218028	GWD	AFR
4027423	-0.434138	GWD	AFR
4027434	-1.04343	GWD	AFR
4027605	-0.551579	GWD	AFR
4027688	-0.551579	GWD	AFR
4027749	1.30103	GWD	AFR
4027876	0.227962	GWD	AFR
4028015	-0.0421541	GWD	AFR
4028060	1.29175	GWD	AFR
4028076	0.186315	GWD	AFR
4028145	-0.540828	GWD	AFR
4028417	-0.684616	GWD	AFR
4028866	-1.36428	GWD	AFR
4028877	1.14238	GWD	AFR
4029577	0.758668	GWD	AFR
4030550	0.403147	GWD	AFR
4030795	-0.140238	GWD	AFR
4030928	-0.119565	GWD	AFR
4030952	0.26653	GWD	AFR
4031140	-0.0950465	GWD	AFR
4031348	0.123701	GWD	AFR
4031793	-0.285142	GWD	AFR
4031794	-0.724125	GWD	AFR
4032021	-0.288587	GWD	AFR
4032489	-0.755661	GWD	AFR
4032581	-0.282946	GWD	AFR
4032716	-0.590325	GWD	AFR
4032802	0.345344	GWD	AFR
4033012	0.747328	GWD	AFR
4033436	0.688886	GWD	AFR
4033522	0.31572	GWD	AFR
4033987	0.784611	GWD	AFR
4034001	-0.270879	GWD	AFR
4034067	0.657272	GWD	AFR
4034403	0.307101	GWD	AFR
4034641	0.51037	GWD	AFR
4035068	0.0991122	GWD	AFR
4035166	1.13203	GWD	AFR
4035366	0.0304362	GWD	AFR
4035432	1.01117	GWD	AFR
4035499	-0.0601116	GWD	AFR
4035583	-0.421614	GWD	AFR
4035735	0.864057	GWD	AFR
4035774	0.130751	GWD	AFR
4035897	-0.562396	GWD	AFR
4036155	0.844082	GWD	AFR
4036286	-0.293787	GWD	AFR
4036338	0.830344	GWD	AFR
4036608	-0.380228	GWD	AFR
4037394	0.396778	GWD	AFR
4037471	0.492511	GWD	AFR
4037525	0.860237	GWD	AFR
4037906	0.824813	GWD	AFR
4037918	0.707584	GWD	AFR
4038359	-0.494673	GWD	AFR
4038387	-0.063705	GWD	AFR
4038480	0.738178	GWD	AFR
4038801	0.884515	GWD	AFR
4039351	0.346617	GWD	AFR
4039379	-0.917814	GWD	AFR
4039383	0.510617	GWD	AFR
4039567	0.610961	GWD	AFR
4039593	-1.07459	GWD	AFR
4039828	0.651091	GWD	AFR
4039968	0.928409	GWD	AFR
4040219	0.340305	GWD	AFR
4040360	-0.351404	GWD	AFR
4040664	0.380172	GWD	AFR
4041760	0.8843	GWD	AFR
4041995	-1.41659	GWD	AFR
4042399	0.814132	GWD	AFR
4042449	0.298328	GWD	AFR
4042470	1.76554	GWD	AFR
4042471	0.793536	GWD	AFR
4042499	-1.23504	GWD	AFR
4042501	1.4337	GWD	AFR
4042533	1.60372	GWD	AFR
4042995	-0.772844	GWD	AFR
4043091	0.837621	GWD	AFR
4043099	-1.53968	GWD	AFR
4043175	0.98428	GWD	AFR
4043218	1.75679	GWD	AFR
4043980	1.56234	GWD	AFR
4044038	0.873722	GWD	AFR
4044479	2.09788	GWD	AFR
4045116	1.25376	GWD	AFR
4045272	-0.468293	GWD	AFR
4045367	1.59571	GWD	AFR
4046952	2.17963	GWD	AFR
4047118	1.41317	GWD	AFR
4047619	1.07053	GWD	AFR
4047746	1.37543	GWD	AFR
4048218	1.46097	GWD	AFR
4048602	0.522393	GWD	AFR
4049365	0.524397	GWD	AFR
4049439	0.612342	GWD	AFR
4050383	0.645202	GWD	AFR
4051065	-0.216668	GWD	AFR
4051261	-0.15272	GWD	AFR
4051513	0.541753	GWD	AFR
4051832	-0.157264	GWD	AFR
4052320	-0.928196	GWD	AFR
4052345	0.286489	GWD	AFR
4052388	-0.248042	GWD	AFR
4052486	0.411901	GWD	AFR
4052717	0.256997	GWD	AFR
4053329	-0.123994	GWD	AFR
4053570	0.387595	GWD	AFR
4055224	-0.651681	GWD	AFR
4055431	-0.279747	GWD	AFR
4056820	-0.378589	GWD	AFR
4056927	0.439769	GWD	AFR
4057144	0.535929	GWD	AFR
4057603	-1.1277	GWD	AFR
4057637	0.377202	GWD	AFR
4057703	-0.147087	GWD	AFR
4057744	-0.147182	GWD	AFR
4057767	0.0153796	GWD	AFR
4057778	-0.145105	GWD	AFR
4057875	-0.690836	GWD	AFR
4057918	0.542883	GWD	AFR
4057983	-0.0830619	GWD	AFR
4058769	0.281084	GWD	AFR
4059401	0.0582751	GWD	AFR
4059439	-0.178465	GWD	AFR
4060301	0.26952	GWD	AFR
4060661	-0.0440489	GWD	AFR
4060760	-0.747874	GWD	AFR
4060980	-0.0434955	GWD	AFR
4061103	0.118172	GWD	AFR
4061616	0.207123	GWD	AFR
4061908	-0.63943	GWD	AFR
4061912	-0.585722	GWD	AFR
4062436	0.346477	GWD	AFR
4062592	0.346572	GWD	AFR
4064326	1.19363	GWD	AFR
4064798	-0.11608	GWD	AFR
4064996	0.0131499	GWD	AFR
4065065	-0.529667	GWD	AFR
4065583	0.420611	GWD	AFR
4065677	0.443144	GWD	AFR
4065736	-0.226683	GWD	AFR
4065743	-0.643202	GWD	AFR
4065992	0.943117	GWD	AFR
4066061	0.896547	GWD	AFR
4066191	0.81552	GWD	AFR
4066435	0.830573	GWD	AFR
4066924	-0.519478	GWD	AFR
4066984	-0.520742	GWD	AFR
4068237	0.112318	GWD	AFR
4068563	0.781427	GWD	AFR
4068798	-0.550565	GWD	AFR
4069987	-0.186948	GWD	AFR
4070085	0.887682	GWD	AFR
4070433	0.511081	GWD	AFR
4071461	-0.303989	GWD	AFR
4071929	0.455876	GWD	AFR
4072538	-0.317481	GWD	AFR
4072616	-0.317481	GWD	AFR
4072774	-0.323332	GWD	AFR
4073152	0.201985	GWD	AFR
4073670	0.748287	GWD	AFR
4074258	-0.0172983	GWD	AFR
4074304	0.345959	GWD	AFR
4074908	0.43672	GWD	AFR
4075152	0.281033	GWD	AFR
4075656	0.00671291	GWD	AFR
4075912	0.869507	GWD	AFR
4076047	0.913032	GWD	AFR
4076094	0.737837	GWD	AFR
4076136	0.010744	GWD	AFR
4076470	0.197204	GWD	AFR
4076676	1.4805	GWD	AFR
4076752	0.419759	GWD	AFR
4076830	1.9474	GWD	AFR
4077138	0.984369	GWD	AFR
4077178	1.22473	GWD	AFR
4077442	1.42483	GWD	AFR
4077461	-0.562932	GWD	AFR
4077605	2.2075	GWD	AFR
4077818	1.92092	GWD	AFR
4078247	2.69978	GWD	AFR
4078478	2.53894	GWD	AFR
4078513	1.98551	GWD	AFR
4078516	2.24424	GWD	AFR
4078744	2.18547	GWD	AFR
4079531	-1.82858	GWD	AFR
4079538	1.58969	GWD	AFR
4079618	-1.71863	GWD	AFR
4080385	0.102022	GWD	AFR
4080757	1.27825	GWD	AFR
4081033	1.27825	GWD	AFR
4081138	-0.592677	GWD	AFR
4081417	0.860142	GWD	AFR
4082254	0.852275	GWD	AFR
4082659	0.612263	GWD	AFR
4082699	-0.4787	GWD	AFR
4083105	-0.850351	GWD	AFR
4083361	-0.444578	GWD	AFR
4083527	0.451034	GWD	AFR
4084253	1.29526	GWD	AFR
4084496	0.91106	GWD	AFR
4085545	-0.237805	GWD	AFR
4086533	1.77993	GWD	AFR
4086861	0.396508	GWD	AFR
4086874	0.505597	GWD	AFR
4087211	-1.5167	GWD	AFR
4087512	0.355494	GWD	AFR
4087976	-0.691913	GWD	AFR
4088191	-0.365642	GWD	AFR
4088559	1.76945	GWD	AFR
4088776	-0.884023	GWD	AFR
4089074	-0.788922	GWD	AFR
4089231	0.253258	GWD	AFR
4089793	-1.38219	GWD	AFR
4090835	0.261421	GWD	AFR
4091131	0.515388	GWD	AFR
4091807	0.496129	GWD	AFR
4091830	-1.32315	GWD	AFR
4091831	-1.32315	GWD	AFR
4091955	-1.27634	GWD	AFR
4091994	0.164314	GWD	AFR
4092053	1.60913	GWD	AFR
4092081	1.60913	GWD	AFR
4092082	-1.27514	GWD	AFR
4092145	-1.49407	GWD	AFR
4092146	0.53782	GWD	AFR
4092171	-1.23579	GWD	AFR
4093048	0.81105	GWD	AFR
4093105	0.52629	GWD	AFR
4093226	-1.28244	GWD	AFR
4093275	-2.12076	GWD	AFR
4093287	-0.653348	GWD	AFR
4093390	1.09	GWD	AFR
4093511	1.08977	GWD	AFR
4093567	-0.776929	GWD	AFR
4093615	-0.776929	GWD	AFR
4093648	-0.479743	GWD	AFR
4093664	1.09856	GWD	AFR
4093769	-0.78537	GWD	AFR
4094157	-0.78537	GWD	AFR
4094328	-1.62418	GWD	AFR
4094479	0.195551	GWD	AFR
4094794	-0.475057	GWD	AFR
4094803	0.841608	GWD	AFR
4094844	1.35028	GWD	AFR
4094953	-0.259042	GWD	AFR
4095126	-0.162083	GWD	AFR
4095234	0.868267	GWD	AFR
4095679	-0.37156	GWD	AFR
4095762	-0.151482	GWD	AFR
4095809	-0.267932	GWD	AFR
4095988	0.861022	GWD	AFR
4096325	0.854879	GWD	AFR
4096368	-0.264459	GWD	AFR
4096485	0.847269	GWD	AFR
4096511	0.0932101	GWD	AFR
4096541	-0.696283	GWD	AFR
4096542	-0.696283	GWD	AFR
4096586	0.848084	GWD	AFR
4096952	-0.263879	GWD	AFR
4097071	-0.364531	GWD	AFR
4097098	-0.536469	GWD	AFR
4097222	-1.42662	GWD	AFR
4097579	0.96846	GWD	AFR
4097824	-1.75659	GWD	AFR
4098305	-0.563498	GWD	AFR
4098582	-0.00744634	GWD	AFR
4098661	-0.521482	GWD	AFR
4098784	-0.868526	GWD	AFR
4098985	1.13111	GWD	AFR
4099001	0.640204	GWD	AFR
4099981	0.300619	GWD	AFR
4100268	-0.31295	GWD	AFR
4100353	0.121731	GWD	AFR
4100354	0.28254	GWD	AFR
4100583	-0.0681519	GWD	AFR
4100900	0.152376	GWD	AFR
4101083	-0.323124	GWD	AFR
4101175	0.352075	GWD	AFR
4101243	0.795971	GWD	AFR
4101300	0.795971	GWD	AFR
4101386	-0.319895	GWD	AFR
4101660	-0.144998	GWD	AFR
4102069	0.0118524	GWD	AFR
4102450	0.0664625	GWD	AFR
4102864	0.623422	GWD	AFR
4103871	0.100626	GWD	AFR
4104299	0.00260594	GWD	AFR
4104512	0.448767	GWD	AFR
4104586	0.63241	GWD	AFR
4105641	0.0404687	GWD	AFR
4106788	0.910652	GWD	AFR
4106789	1.99021	GWD	AFR
4107142	0.805172	GWD	AFR
4107245	0.454439	GWD	AFR
4107990	0.730359	GWD	AFR
4108115	0.842327	GWD	AFR
4108708	-0.244004	GWD	AFR
4108907	-0.4517	GWD	AFR
4109409	-0.350513	GWD	AFR
4109534	0.179972	GWD	AFR
4109594	0.920591	GWD	AFR
4109664	0.920591	GWD	AFR
4109825	-0.430788	GWD	AFR
4110036	-0.808081	GWD	AFR
4110127	-0.667904	GWD	AFR
4110193	0.769591	GWD	AFR
4111525	-0.811029	GWD	AFR
4113236	0.0084587	GWD	AFR
4114709	0.0391015	GWD	AFR
4115028	-0.275298	GWD	AFR
4115493	0.224088	GWD	AFR
4116588	0.203091	GWD	AFR
4117429	-0.314847	GWD	AFR
4117930	-0.316094	GWD	AFR
4118391	0.316767	GWD	AFR
4118462	0.298266	GWD	AFR
4118690	0.0899287	GWD	AFR
4118878	0.354118	GWD	AFR
4120076	0.592537	GWD	AFR
4120121	0.238381	GWD	AFR
4120857	0.292561	GWD	AFR
4121921	0.783866	GWD	AFR
4122223	1.0246	GWD	AFR
4122923	-0.745255	GWD	AFR
4123323	0.41011	GWD	AFR
4123420	0.41011	GWD	AFR
4123633	0.413442	GWD	AFR
4124107	0.415424	GWD	AFR
4124280	-0.606581	GWD	AFR
4124300	0.495939	GWD	AFR
4124590	0.369001	GWD	AFR
4125824	-0.445062	GWD	AFR
4126201	-0.46243	GWD	AFR
4126202	-0.955913	GWD	AFR
4126531	1.15296	GWD	AFR
4126976	-0.418122	GWD	AFR
4127276	0.626686	GWD	AFR
4128516	-0.369245	GWD	AFR
4128563	-0.24347	GWD	AFR
4128581	0.120613	GWD	AFR
4128631	0.116936	GWD	AFR
4128641	1.18607	GWD	AFR
4128843	0.651433	GWD	AFR
4129753	-1.29063	GWD	AFR
4129915	0.585845	GWD	AFR
4130193	-0.398472	GWD	AFR
4130204	0.491919	GWD	AFR
4130444	-0.986259	GWD	AFR
4131838	1.53215	GWD	AFR
4131883	0.033417	GWD	AFR
4131898	-1.04015	GWD	AFR
4132309	-1.07375	GWD	AFR
4132777	0.745393	GWD	AFR
4132922	-1.2514	GWD	AFR
4133013	1.42719	GWD	AFR
4133033	-0.627347	GWD	AFR
4133076	1.42719	GWD	AFR
4133618	-0.542619	GWD	AFR
4134162	1.45111	GWD	AFR
4134246	1.42846	GWD	AFR
4134659	-0.490263	GWD	AFR
4135260	-0.990838	GWD	AFR
4135294	1.38521	GWD	AFR
4135295	2.59257	GWD	AFR
4135350	-0.943425	GWD	AFR
4135418	-0.895571	GWD	AFR
4135562	0.0990235	GWD	AFR
4135758	-1.24586	GWD	AFR
4135898	0.457207	GWD	AFR
4136157	-1.43978	GWD	AFR
4136172	-1.10278	GWD	AFR
4136418	-0.705305	GWD	AFR
4136727	0.115981	GWD	AFR
4136821	-1.69132	GWD	AFR
4136871	-0.251929	GWD	AFR
4137019	-1.02026	GWD	AFR
4137179	-0.953665	GWD	AFR
4137262	-0.297369	GWD	AFR
4137329	-0.874868	GWD	AFR
4137856	0.697506	GWD	AFR
4138473	0.62009	GWD	AFR
4138477	-0.479719	GWD	AFR
4139156	-0.799178	GWD	AFR
4139364	-0.672699	GWD	AFR
4139419	0.521311	GWD	AFR
4140188	-0.686375	GWD	AFR
4140298	0.149776	GWD	AFR
4140459	-0.0881535	GWD	AFR
4141127	0.61976	GWD	AFR
4141231	-0.838626	GWD	AFR
4141277	-0.278047	GWD	AFR
4141728	-0.112127	GWD	AFR
4141788	-0.462833	GWD	AFR
4143181	-1.4008	GWD	AFR
4145141	-0.185792	GWD	AFR
4145164	0.86438	GWD	AFR
4145949	-0.245377	GWD	AFR
4146695	0.39726	GWD	AFR
4147180	-0.628516	GWD	AFR
4147523	-0.776858	GWD	AFR
4147630	-0.522172	GWD	AFR
4148204	-0.857726	GWD	AFR
4148407	0.0734508	GWD	AFR
4148434	-0.125182	GWD	AFR
4148478	0.722029	GWD	AFR
4148617	-0.585784	GWD	AFR
4148689	-0.16741	GWD	AFR
4149095	-0.192874	GWD	AFR
4149131	-2.07061	GWD	AFR
4149175	-0.104149	GWD	AFR
4150427	0.732023	GWD	AFR
4150448	-0.00880827	GWD	AFR
4150479	-0.373227	GWD	AFR
4150609	-0.872197	GWD	AFR
4151587	-0.068477	GWD	AFR
4151597	0.680729	GWD	AFR
4151999	-1.8865	GWD	AFR
4152190	0.358603	GWD	AFR
4152718	0.0607502	GWD	AFR
4153153	-1.79432	GWD	AFR
4153178	-0.879766	GWD	AFR
4153200	-0.95627	GWD	AFR
4153389	-1.75126	GWD	AFR
4153524	0.258503	GWD	AFR
4154338	0.339081	GWD	AFR
4154536	0.494278	GWD	AFR
4154551	1.05276	GWD	AFR
4154851	0.326772	GWD	AFR
4155082	0.253633	GWD	AFR
4155419	0.945329	GWD	AFR
4155538	0.230394	GWD	AFR
4155599	0.771014	GWD	AFR
4155763	-0.41355	GWD	AFR
4155781	-0.460689	GWD	AFR
4156423	1.28064	GWD	AFR
4156535	0.0315665	GWD	AFR
4156857	-0.398099	GWD	AFR
4157696	-0.0421422	GWD	AFR
4157869	1.0807	GWD	AFR
4158352	-0.0120976	GWD	AFR
4158668	-0.0473022	GWD	AFR
4160370	0.977611	GWD	AFR
4160538	-0.834709	GWD	AFR
4161793	1.09719	GWD	AFR
4162526	-0.713702	GWD	AFR
4162760	-0.144458	GWD	AFR
4165817	-0.49646	GWD	AFR
4012825	1.70043	MSL	AFR
4013144	0.618213	MSL	AFR
4013467	1.21845	MSL	AFR
4013556	1.17256	MSL	AFR
4014141	-0.17459	MSL	AFR
4014245	-0.560978	MSL	AFR
4014770	-0.767865	MSL	AFR
4014922	0.248888	MSL	AFR
4014964	-0.383916	MSL	AFR
4014982	1.43855	MSL	AFR
4015313	-0.426375	MSL	AFR
4015316	1.09641	MSL	AFR
4015729	-0.0187486	MSL	AFR
4016676	-0.643104	MSL	AFR
4016943	1.06878	MSL	AFR
4017270	-1.00971	MSL	AFR
4017278	-0.559442	MSL	AFR
4017534	-0.490462	MSL	AFR
4017685	1.03281	MSL	AFR
4018031	0.573379	MSL	AFR
4018425	-0.670114	MSL	AFR
4019114	0.56583	MSL	AFR
4019123	0.494604	MSL	AFR
4019350	0.726744	MSL	AFR
4019530	-0.308765	MSL	AFR
4020391	-0.676294	MSL	AFR
4020732	0.0113974	MSL	AFR
4021051	-1.35542	MSL	AFR
4021411	-0.582865	MSL	AFR
4021734	-1.24431	MSL	AFR
4021803	0.0773385	MSL	AFR
4022167	-0.742761	MSL	AFR
4022638	-1.2161	MSL	AFR
4022694	-0.322602	MSL	AFR
4022703	-0.535521	MSL	AFR
4023022	0.444404	MSL	AFR
4023553	0.110705	MSL	AFR
4024128	0.168196	MSL	AFR
4024446	0.00224334	MSL	AFR
4025162	-0.214995	MSL	AFR
4025214	-0.112709	MSL	AFR
4025385	-0.381959	MSL	AFR
4026238	-0.24358	MSL	AFR
4026720	0.393011	MSL	AFR
4027399	-0.42396	MSL	AFR
4027423	-0.852413	MSL	AFR
4027596	-0.174413	MSL	AFR
4027605	-0.935958	MSL	AFR
4027688	-0.935958	MSL	AFR
4027749	0.611516	MSL	AFR
4028015	0.169188	MSL	AFR
4028060	0.293155	MSL	AFR
4028145	0.454175	MSL	AFR
4028417	0.111454	MSL	AFR
4028866	-0.0774037	MSL	AFR
4028877	0.374777	MSL	AFR
4029577	-0.0709828	MSL	AFR
4030550	0.636087	MSL	AFR
4030795	0.336054	MSL	AFR
4030928	-0.434241	MSL	AFR
4030952	0.432607	MSL	AFR
4031140	-0.382902	MSL	AFR
4031348	-0.148595	MSL	AFR
4031793	-0.0324919	MSL	AFR
4031794	-0.120594	MSL	AFR
4032021	-0.218884	MSL	AFR
4032489	-0.132744	MSL	AFR
4032581	0.344334	MSL	AFR
4032716	0.215156	MSL	AFR
4032802	0.295186	MSL	AFR
4032967	0.781554	MSL	AFR
4033012	0.243007	MSL	AFR
4033054	0.423297	MSL	AFR
4033436	0.53496	MSL	AFR
4033522	0.924482	MSL	AFR
4033729	1.11827	MSL	AFR
4033987	0.927619	MSL	AFR
4034001	-0.17338	MSL	AFR
4034067	0.911007	MSL	AFR
4034641	0.280314	MSL	AFR
4035068	0.316427	MSL	AFR
4035366	0.131852	MSL	AFR
4035462	0.815837	MSL	AFR
4035499	0.0245037	MSL	AFR
4035532	-0.0985062	MSL	AFR
4035583	-0.244558	MSL	AFR
4035735	0.787625	MSL	AFR
4035897	0.52731	MSL	AFR
4036286	-0.0255734	MSL	AFR
4036523	-0.262108	MSL	AFR
4036608	-0.148279	MSL	AFR
4037038	-0.143475	MSL	AFR
4037394	0.310393	MSL	AFR
4037471	-0.288559	MSL	AFR
4037906	0.421403	MSL	AFR
4037918	0.618944	MSL	AFR
4038359	0.0517231	MSL	AFR
4038387	0.318338	MSL	AFR
4038480	0.580623	MSL	AFR
4038606	-0.377582	MSL	AFR
4039351	0.298468	MSL	AFR
4039379	-0.361768	MSL	AFR
4039383	0.215404	MSL	AFR
4039567	0.685359	MSL	AFR
4039593	-0.537007	MSL	AFR
4039828	0.722775	MSL	AFR
4039968	0.281825	MSL	AFR
4040219	0.35839	MSL	AFR
4040360	0.63528	MSL	AFR
4040770	0.0760906	MSL	AFR
4041175	0.0795162	MSL	AFR
4041760	0.876024	MSL	AFR
4041995	-1.00043	MSL	AFR
4042449	-0.831646	MSL	AFR
4042470	1.23147	MSL	AFR
4042810	1.25714	MSL	AFR
4042995	0.0835286	MSL	AFR
4043091	1.43153	MSL	AFR
4043099	-1.38814	MSL	AFR
4043175	1.66372	MSL	AFR
4043218	1.81627	MSL	AFR
4043980	1.79633	MSL	AFR
4044038	1.59705	MSL	AFR
4044479	1.87323	MSL	AFR
4045116	1.79132	MSL	AFR
4045272	-0.278361	MSL	AFR
4045367	1.17441	MSL	AFR
4046952	1.70977	MSL	AFR
4047118	1.97932	MSL	AFR
4047619	1.37478	MSL	AFR
4047746	1.34071	MSL	AFR
4048218	1.44777	MSL	AFR
4048602	0.532519	MSL	AFR
4049365	0.597489	MSL	AFR
4049439	0.687666	MSL	AFR
4050383	0.488415	MSL	AFR
4051065	0.189098	MSL	AFR
4051261	-0.258972	MSL	AFR
4051513	-0.390201	MSL	AFR
4051832	0.132564	MSL	AFR
4052320	-0.910115	MSL	AFR
4052345	0.197189	MSL	AFR
4052388	0.116986	MSL	AFR
4052486	0.351898	MSL	AFR
4052717	0.557397	MSL	AFR
4053329	0.196169	MSL	AFR
4053570	0.495836	MSL	AFR
4055224	-0.728479	MSL	AFR
4055431	0.320355	MSL	AFR
4056820	-0.312756	MSL	AFR
4056927	0.253584	MSL	AFR
4057144	0.454747	MSL	AFR
4057603	-0.789131	MSL	AFR
4057637	-0.0839293	MSL	AFR
4057703	-0.134635	MSL	AFR
4057744	-0.134848	MSL	AFR
4057767	0.136742	MSL	AFR
4057778	-0.123833	MSL	AFR
4057875	-0.899557	MSL	AFR
4057895	0.366493	MSL	AFR
4057918	0.438316	MSL	AFR
4057983	0.227287	MSL	AFR
4058769	0.669556	MSL	AFR
4059401	0.202217	MSL	AFR
4059439	0.425298	MSL	AFR
4060301	0.718805	MSL	AFR
4060661	-0.00306988	MSL	AFR
4060760	-0.879841	MSL	AFR
4060980	-0.00736213	MSL	AFR
4061103	-0.103124	MSL	AFR
4061616	0.567276	MSL	AFR
4061811	0.251828	MSL	AFR
4061908	-0.81711	MSL	AFR
4061912	-0.81711	MSL	AFR
4062436	0.776764	MSL	AFR
4062592	0.776764	MSL	AFR
4063551	0.059801	MSL	AFR
4064326	-0.00911486	MSL	AFR
4064798	0.00842613	MSL	AFR
4064996	-0.0430442	MSL	AFR
4065065	-0.99674	MSL	AFR
4065412	-0.268321	MSL	AFR
4065583	0.243366	MSL	AFR
4065677	0.208182	MSL	AFR
4065736	-0.437923	MSL	AFR
4065743	-0.377026	MSL	AFR
4065946	-0.312164	MSL	AFR
4065992	0.546196	MSL	AFR
4066061	1.28214	MSL	AFR
4066191	0.195605	MSL	AFR
4066423	0.252926	MSL	AFR
4066435	0.247076	MSL	AFR
4066924	-0.236878	MSL	AFR
4066984	-0.30138	MSL	AFR
4068039	0.349157	MSL	AFR
4068147	0.349157	MSL	AFR
4068159	0.459669	MSL	AFR
4068237	0.196133	MSL	AFR
4068344	0.355769	MSL	AFR
4068374	0.244764	MSL	AFR
4068563	0.237978	MSL	AFR
4068798	-0.283661	MSL	AFR
4068814	0.351016	MSL	AFR
4068920	-0.16196	MSL	AFR
4069987	0.224509	MSL	AFR
4070080	0.264714	MSL	AFR
4070085	0.820329	MSL	AFR
4070433	0.774084	MSL	AFR
4070475	0.57665	MSL	AFR
4070586	0.57665	MSL	AFR
4071461	0.0370518	MSL	AFR
4071550	0.629973	MSL	AFR
4071929	0.301613	MSL	AFR
4072538	-0.110447	MSL	AFR
4072616	-0.110447	MSL	AFR
4072681	0.765651	MSL	AFR
4072774	-0.118528	MSL	AFR
4073152	-0.484347	MSL	AFR
4073670	0.664762	MSL	AFR
4074258	0.201917	MSL	AFR
4074304	0.596946	MSL	AFR
4074908	0.692948	MSL	AFR
4075152	-0.00330435	MSL	AFR
4075346	0.477739	MSL	AFR
4075656	0.15573	MSL	AFR
4075912	0.973229	MSL	AFR
4076047	0.973229	MSL	AFR
4076094	1.04777	MSL	AFR
4076136	-0.150154	MSL	AFR
4076470	0.343046	MSL	AFR
4076676	1.61233	MSL	AFR
4076752	0.797497	MSL	AFR
4076830	1.98018	MSL	AFR
4077138	0.793963	MSL	AFR
4077178	1.94623	MSL	AFR
4077442	1.84794	MSL	AFR
4077461	-1.58327	MSL	AFR
4077818	2.37856	MSL	AFR
4077951	2.34144	MSL	AFR
4078200	2.38768	MSL	AFR
4078247	2.53176	MSL	AFR
4078478	2.45	MSL	AFR
4078513	2.22967	MSL	AFR
4078516	2.40397	MSL	AFR
4078744	2.40757	MSL	AFR
4079531	-1.56122	MSL	AFR
4079618	-1.46734	MSL	AFR
4080013	-1.62946	MSL	AFR
4080385	1.01915	MSL	AFR
4080757	1.28019	MSL	AFR
4081033	1.27924	MSL	AFR
4081138	-0.559768	MSL	AFR
4081417	0.745063	MSL	AFR
4082254	0.951242	MSL	AFR
4082659	0.448834	MSL	AFR
4082699	-0.31909	MSL	AFR
4083105	-1.19483	MSL	AFR
4083361	-1.32829	MSL	AFR
4083811	0.259877	MSL	AFR
4084210	0.631392	MSL	AFR
4084253	1.48803	MSL	AFR
4084496	0.543781	MSL	AFR
4085545	-1.05256	MSL	AFR
4086533	0.511888	MSL	AFR
4086861	-0.539827	MSL	AFR
4086874	0.110964	MSL	AFR
4087211	-1.39442	MSL	AFR
4087512	-0.210625	MSL	AFR
4087976	-0.331239	MSL	AFR
4088191	-2.01256	MSL	AFR
4088559	0.431528	MSL	AFR
4088776	0.0208541	MSL	AFR
4089074	-0.201862	MSL	AFR
4089231	0.594759	MSL	AFR
4089641	-1.01592	MSL	AFR
4089793	0.199422	MSL	AFR
4090819	-0.575546	MSL	AFR
4091131	-0.766266	MSL	AFR
4091807	-0.759847	MSL	AFR
4091830	0.312586	MSL	AFR
4091831	0.312586	MSL	AFR
4091897	-1.63325	MSL	AFR
4091955	0.954958	MSL	AFR
4092053	-0.412352	MSL	AFR
4092081	-0.412352	MSL	AFR
4092082	0.960247	MSL	AFR
4092145	-1.67157	MSL	AFR
4092146	-1.09409	MSL	AFR
4092171	0.958418	MSL	AFR
4092480	-0.654478	MSL	AFR
4093048	1.92222	MSL	AFR
4093105	-0.637493	MSL	AFR
4093226	0.832974	MSL	AFR
4093275	-0.946662	MSL	AFR
4093287	-0.42307	MSL	AFR
4093390	-0.301798	MSL	AFR
4093511	-0.289678	MSL	AFR
4093567	0.846933	MSL	AFR
4093615	0.846933	MSL	AFR
4093648	-0.710509	MSL	AFR
4093664	-0.17371	MSL	AFR
4093769	0.739814	MSL	AFR
4094157	0.740493	MSL	AFR
4094328	-1.00342	MSL	AFR
4094479	-0.317501	MSL	AFR
4094794	-1.18224	MSL	AFR
4094803	-0.0658859	MSL	AFR
4094844	0.50743	MSL	AFR
4094953	0.773236	MSL	AFR
4095126	-0.509892	MSL	AFR
4095234	-0.0298783	MSL	AFR
4095679	-0.687379	MSL	AFR
4095762	-0.498324	MSL	AFR
4095809	0.757646	MSL	AFR
4095988	-0.0243469	MSL	AFR
4096325	-0.0394003	MSL	AFR
4096344	-0.592006	MSL	AFR
4096368	0.762688	MSL	AFR
4096485	-0.0454433	MSL	AFR
4096511	-0.404057	MSL	AFR
4096541	0.0827046	MSL	AFR
4096542	0.0827046	MSL	AFR
4096586	-0.00889121	MSL	AFR
4096952	0.732111	MSL	AFR
4097071	-0.65283	MSL	AFR
4097222	-0.83714	MSL	AFR
4097377	-0.307773	MSL	AFR
4097579	0.126828	MSL	AFR
4097824	-0.63302	MSL	AFR
4098305	0.253177	MSL	AFR
4098582	-0.316466	MSL	AFR
4098661	0.280048	MSL	AFR
4098784	-0.164062	MSL	AFR
4098985	0.423848	MSL	AFR
4099001	-0.079333	MSL	AFR
4099981	-0.0072304	MSL	AFR
4100268	-0.634601	MSL	AFR
4100353	0.45847	MSL	AFR
4100354	0.096552	MSL	AFR
4100583	0.319615	MSL	AFR
4100900	0.477233	MSL	AFR
4101083	-0.220277	MSL	AFR
4101175	0.13606	MSL	AFR
4101243	0.471395	MSL	AFR
4101300	0.471395	MSL	AFR
4101386	-0.249796	MSL	AFR
4101660	0.0871026	MSL	AFR
4102069	-0.0494095	MSL	AFR
4102367	0.507104	MSL	AFR
4102864	0.500677	MSL	AFR
4103520	0.779152	MSL	AFR
4103871	-0.105389	MSL	AFR
4104299	-0.215196	MSL	AFR
4104472	0.629993	MSL	AFR
4104512	0.0965695	MSL	AFR
4104586	0.674116	MSL	AFR
4105641	0.269757	MSL	AFR
4106788	0.955947	MSL	AFR
4106789	1.74076	MSL	AFR
4107142	1.07403	MSL	AFR
4107245	0.822902	MSL	AFR
4107990	0.733569	MSL	AFR
4108115	0.842099	MSL	AFR
4108708	0.129438	MSL	AFR
4108907	-0.533259	MSL	AFR
4109409	-0.635604	MSL	AFR
4109534	-0.21026	MSL	AFR
4109594	0.822599	MSL	AFR
4109664	0.822599	MSL	AFR
4109825	-0.168388	MSL	AFR
4110036	-0.162925	MSL	AFR
4110127	-0.862518	MSL	AFR
4110193	0.188412	MSL	AFR
4111525	0.0231315	MSL	AFR
4113236	-0.0117002	MSL	AFR
4113973	-0.0482779	MSL	AFR
4114709	0.375724	MSL	AFR
4115028	-0.0813763	MSL	AFR
4115493	0.16461	MSL	AFR
4116588	-0.0627216	MSL	AFR
4117429	-0.507193	MSL	AFR
4117930	-0.522782	MSL	AFR
4118391	0.189073	MSL	AFR
4118462	0.190935	MSL	AFR
4118690	-0.44012	MSL	AFR
4118878	0.139275	MSL	AFR
4120076	0.61053	MSL	AFR
4120121	-0.107988	MSL	AFR
4120857	0.367763	MSL	AFR
4121921	0.933292	MSL	AFR
4122223	1.1302	MSL	AFR
4122923	-0.546854	MSL	AFR
4123323	1.40581	MSL	AFR
4123420	1.40581	MSL	AFR
4123633	1.41451	MSL	AFR
4124107	1.4375	MSL	AFR
4124280	-0.829674	MSL	AFR
4124300	1.53616	MSL	AFR
4124590	-0.573653	MSL	AFR
4124897	-0.911865	MSL	AFR
4125824	-0.753478	MSL	AFR
4126201	1.105	MSL	AFR
4126202	-0.773507	MSL	AFR
4126531	-0.729367	MSL	AFR
4126976	1.44496	MSL	AFR
4127276	1.43284	MSL	AFR
4128516	1.43602	MSL	AFR
4128563	1.59783	MSL	AFR
4128581	1.32352	MSL	AFR
4128631	1.32352	MSL	AFR
4128641	0.782515	MSL	AFR
4128843	-0.685654	MSL	AFR
4129915	1.36005	MSL	AFR
4130193	-1.04003	MSL	AFR
4130204	1.00986	MSL	AFR
4130444	-1.07144	MSL	AFR
4131838	0.976177	MSL	AFR
4131883	-1.28068	MSL	AFR
4131898	-0.629894	MSL	AFR
4132125	-1.02002	MSL	AFR
4132309	-1.09998	MSL	AFR
4132777	-0.0465864	MSL	AFR
4133013	0.66532	MSL	AFR
4133033	0.0912203	MSL	AFR
4133076	0.711685	MSL	AFR
4133618	-0.79372	MSL	AFR
4134162	0.352374	MSL	AFR
4134246	0.324956	MSL	AFR
4134659	-0.771565	MSL	AFR
4135260	-0.577303	MSL	AFR
4135294	0.17413	MSL	AFR
4135295	2.48867	MSL	AFR
4135350	-0.496856	MSL	AFR
4135418	-0.297269	MSL	AFR
4135562	0.171237	MSL	AFR
4135708	-1.21718	MSL	AFR
[truncated: 8,178 more rows]
