# Supplementary material for: A sex-specific evolutionary interaction between ADCY9 and CETP
Source: eLife journal article supplement (doi:10.7554/elife.69198), 2021-10-05
Supplement: supp [file elife-69198-supp-v1.zip › elife_poa_e69198_Figure_2_source_data_3.txt]

Position	PEL	MXL	CHB	Chr
4003044	0.000603666049140663	0.00339496035705265	0.00263059198712298	16
4003054	0.00730495730407508	0.000564429717283916	0.0024344743754136	16
4003336	0.0383469984254694	0.0194010346759067	0.0322901343528754	16
4003733	0.000603666049140663	0.00339496035705265	0.00263059198712298	16
4003763	0.00635353498715758	0.00260724268590896	0.000479705488699048	16
4003969	0.00829206749142118	0.00307222398389078	1.71583461582693e-05	16
4003974	0.00902935151270184	0.00850966154467522	0.0239673803641088	16
4004405	0.00167456289369151	0.00093696704252139	0.00024855545446188	16
4004415	0.0378659939513345	0.017269815363728	0.0258226559131055	16
4004515	0.00729543645225319	0.000640117272315684	0.00242523366724006	16
4004793	0.00795678169820377	0.00413906080049549	0.00495240413378934	16
4005324	0.00725701140093068	0.00696347795310991	0.0056730710632283	16
4005521	0.00591751807385106	0.00319047779061622	0.0043231338657368	16
4006163	0.00381771215642025	0.00580145546216711	0.0291689045970873	16
4006504	2.37101144424874e-05	0.00108925746571851	0.00141475884652901	16
4006510	0.001511634116438	0.000649561182302413	0.00151645650095175	16
4006609	0.00915801243594412	0.0031039760312281	0.00478788976901083	16
4006742	0.00404200253499804	0.0061481439557409	0.0496869386205514	16
4007086	0.0188695608268838	0.0104165193140764	0.0148090685958419	16
4007092	0.000665850139906652	0.00345847199398956	0.0202006033770987	16
4007297	0.0020151521551091	0.000831764044914908	0.00250886748356574	16
4007505	0.0020151521551091	0.000831764044914908	0.00250886748356574	16
4007667	0.0020151521551091	0.000831764044914908	0.00250886748356574	16
4008230	0.00525114522642803	0.00328256664027006	0.0469196048735484	16
4008901	0.0300385481120472	0.0180553002948779	0.0351756767156045	16
4009122	0.0040544066536588	0.00172499707982451	0.0485375704573712	16
4009764	0.00188384466012906	0.0180723780542754	0.000672107448964775	16
4009906	0.00650704668313978	0.00504622931585307	0.00589344255894431	16
4010053	0.0249529617034232	0.00973217468148879	0.0104832019883186	16
4011174	0.00274204783501166	4.78357086316747e-05	0.00607050499348699	16
4011223	0.0112801500141161	0.0194657505906644	0.0419798540730754	16
4011463	0.0014999751983502	0.000521432437179679	0.00190799477949792	16
4011508	0.0020151521551091	0.000831764044914908	0.00250886748356574	16
4012042	0.0020151521551091	0.000831764044914908	0.00250886748356574	16
4012480	0.0224479872352336	0.00524137189356569	0.00325399214504346	16
4013144	0.00891714613634851	0.0113115052573609	0.0451528721333428	16
4013467	0.0251361752837698	0.00611306904510067	0.00756762749133229	16
4014141	0.00843992833484446	0.00963419658605893	0.0416759992763435	16
4014206	0.00843992833484446	0.00963419658605893	0.0416759992763435	16
4014245	0.00267714470445736	0.00356470123181	0.00248837400629271	16
4014269	0.00843992833484446	0.00963419658605893	0.0416759992763435	16
4014282	0.0255595050087093	0.0081887420022691	0.00882275775026538	16
4014553	0.0020151521551091	0.000831764044914908	0.00250886748356574	16
4014770	0.00740763451657188	0.00746396901052685	0.0438996448943288	16
4014964	0.00212161086042381	0.00301086738025107	0.000727060300832955	16
4014982	0.00740763451657188	0.00746396901052685	0.0438996448943288	16
4015046	0.0238510008327346	0.00830948195643337	0.00810636397702825	16
4015313	0.00371157502797101	0.00607070346239291	0.0390114909693451	16
4015316	0.00200574514565708	0.00458228626629048	0.040781298990066	16
4015507	0.0111135438993658	0.00852166486896743	0.0653656991886748	16
4015729	0.0221471913711364	0.00916013747966828	0.00896892830783992	16
4016049	0.00914917199083006	0.0074991435145821	0.0645776923314605	16
4016377	0.0111135438993658	0.00852166486896743	0.0653656991886748	16
4016463	0.00167456289369151	0.00093696704252139	0.00024855545446188	16
4016676	0.00241461851665785	0.00330330405962888	0.00175135338217028	16
4016943	0.00428633840150751	0.00218920989604175	0.0463803460791883	16
4017270	0.00623452455355343	0.00528726325937247	0.0480309058015742	16
4017278	0.00428633840150751	0.00218920989604175	0.0463803460791883	16
4017392	0.0230324094942831	0.00579445540368018	0.00725315552718022	16
4017534	0.00428633840150751	0.00218920989604175	0.0463803460791883	16
4017566	0.00973456637380451	0.00916903826485805	0.0392409977118016	16
4017567	0.0213744005315068	0.00753477345500055	0.00795220546894297	16
4017685	0.00428719988541311	0.00218595680953143	0.0445244390098472	16
4018219	0.0020151521551091	0.000831764044914908	0.00250886748356574	16
4018425	0.00620949744822479	0.00526030467790936	0.0461653091494963	16
4019064	0.00821533171457545	0.00700180839455154	0.0683811478965914	16
4019216	0.0101572015815501	0.00806365895832127	0.0691877858419942	16
4019350	0.00539052556913549	0.00726798525091285	0.0417336619471971	16
4019530	0.00177560631095624	0.00104036261932108	0.0389277830671516	16
4020391	0.00794151790087654	0.00871804708483246	0.0458903915040364	16
4020732	0.0416067696049834	0.021359168954123	0.0372870080754338	16
4020951	0.0014999751983502	0.000521432437179679	0.00190799477949792	16
4021051	0.00267714470445736	0.00356470123181	0.00248837400629271	16
4021734	0.00241461851665785	0.00330330405962888	0.00175135338217028	16
4022167	0.00619522256688938	0.00524423637452217	0.0444151310058842	16
4022185	0.00619522256688938	0.00524423637452217	0.0444151310058842	16
4022638	0.00188162962549347	0.00293571472458193	0.00135528854036601	16
4022694	0.0270262422148655	0.000780114723548706	0.00214417123226784	16
4022703	0.00285082563735554	0.0047905165494209	0.0177987283944852	16
4023022	0.00190522176114451	0.000803290618160769	0.000891137038799455	16
4023028	0.00317286683507429	0.000677578086542527	0.0726335525675581	16
4023553	0.00309826771614492	0.00125520011479643	0.00833253466043551	16
4024128	0.0421745618680086	0.0145502485924161	0.0195664344380109	16
4024143	0.00823977253980318	0.00901721639494852	0.0193153604513644	16
4025385	0.00329964347546464	0.00146056966956005	0.0100652280419622	16
4025986	0.00532469892961206	0.00533279726598967	0.0628884665011488	16
4026075	0.00685870751321187	0.00611015934203881	0.0179987278224279	16
4026238	0.00858937980379028	0.0102879107464557	0.0553277696394196	16
4026720	0.000477002760569579	0.00213833125386717	0.00381362517480174	16
4027232	0.00167456289369151	0.00093696704252139	0.00024855545446188	16
4027291	0.0032102576444806	0.00400985159849658	0.00190328987545548	16
4027399	0.000477002760569579	0.00213833125386717	0.00381362517480174	16
4027423	0.000148942211979395	0.00291798736942309	0.0523248817324544	16
4027605	0.00329964347546464	0.00146056966956005	0.0100652280419622	16
4027688	0.00329964347546464	0.00146056966956005	0.0100652280419622	16
4027749	0.000968438933901571	0.00387104742365074	0.0148122168729863	16
4028039	0.00260348935930726	0.00356797603386525	0.0657307055397337	16
4028060	0.000302906169550432	0.00207833705466568	6.42625831385271e-05	16
4028145	0.00329661813798107	0.00439343362733606	0.00633556223938711	16
4028211	0.0020151521551091	0.000831764044914908	0.00250886748356574	16
4028417	0.00351984029049092	0.00501766452934988	0.00252682448120549	16
4028528	0.0020151521551091	0.000831764044914908	0.00250886748356574	16
4028621	0.00356118372455272	0.00591440642815338	0.0397725250135168	16
4028866	0.00345643995183202	0.00581446176566789	0.0380382711230872	16
4028877	0.00137034435690397	0.00104584381942192	0.000701424082556046	16
4029329	0.00274204783501166	4.78357086316747e-05	0.00607050499348699	16
4029577	0.00783230965698315	0.00615570719382516	0.1036608042522	16
4030108	0.000477002760569579	0.00213833125386717	0.00381362517480174	16
4030278	0.00586271439206331	0.00640068911303374	0.0176837517206576	16
4030280	0.00449530105954785	0.0054686377832414	0.0131190698688809	16
4030281	0.00586271439206331	0.00640068911303374	0.0176837517206576	16
4030282	0.00449530105954785	0.0054686377832414	0.0131190698688809	16
4030322	0.00443611132738922	0.00475723275137179	0.0666556119620489	16
4030658	0.00532469892961206	0.00533279726598967	0.0628884665011488	16
4030768	0.00157418093152917	0.00293364799537562	0.00460441753438846	16
4030795	0.00601138519082076	0.00746230801770634	0.040234766484831	16
4030928	0.00325668149765822	0.00236677999174242	0.00374840334865453	16
4031140	0.00325668149765822	0.00236677999174242	0.00374840334865453	16
4031205	0.00323815790072357	0.00144294079873356	0.00434912586283321	16
4031325	0.00325668149765822	0.00236677999174242	0.00374840334865453	16
4031348	0.00128900165602228	0.0011268305023615	0.000848667673116768	16
4031657	0.0020151521551091	0.000831764044914908	0.00250886748356574	16
4031794	0.00182495463874812	0.00459226429070652	0.0334963777330499	16
4031926	0.00863911337346739	0.0103337547642108	0.0573522167138892	16
4031933	0.00532469892961206	0.00533279726598967	0.0628884665011488	16
4032021	0.00861808698694753	0.0103161567732744	0.0555221725831437	16
4032489	0.00182495463874812	0.00459226429070652	0.0334963777330499	16
4032581	0.00212253490762991	0.00496750078447489	0.032030306723335	16
4032716	0.00191062016520351	0.0046726465983351	0.0351632821881689	16
4032802	0.00817252823631032	0.00893943861994562	0.0570501028230294	16
4033012	0.00441217692711603	0.00209129641532261	0.105821892685313	16
4033097	0.0183779371492973	0.0136192675371762	0.036767613445932	16
4033436	0.0145290806261836	0.0119899706908665	0.0350649924423696	16
4033522	0.000289535280417511	0.00267587301328367	0.0354218232215565	16
4033668	0.00524302466176229	0.00738067396176644	0.0201624143439401	16
4033729	0.0020151521551091	0.000831764044914908	0.00250886748356574	16
4033751	0.00073582146538147	0.00106222667922109	0.0636567897758343	16
4033987	0.0445206578179622	0.0232318697642433	0.0439314427215762	16
4034001	0.0147478316648965	0.010347171340067	0.0254877226466404	16
4034067	0.0280722447620877	0.0222847683526843	0.102137455135241	16
4034223	0.0014999751983502	0.000521432437179679	0.00190799477949792	16
4034640	0.00152666321814929	0.00391220406103852	0.00767329306229589	16
4034641	0.00152666321814929	0.00391220406103852	0.00767329306229589	16
4034928	0.00420095884747303	0.00464925647263663	0.00655131857017064	16
4035068	0.00329534930597255	0.000781180565311012	0.00160322892913781	16
4035166	0.00808452295861945	0.00881193146633928	0.0151017776244919	16
4035226	0.000990524287623106	0.000252692480951369	0.00129788547116511	16
4035366	0.00420095884747303	0.00464925647263663	0.00655131857017064	16
4035407	0.00916872169073452	0.00844312618984452	0.0790279671660096	16
4035432	0.00771390400023361	0.00750021631464366	0.0164224278862443	16
4035499	0.00420095884747303	0.00464925647263663	0.00655131857017064	16
4035583	0.00298370540537255	0.00457953182496338	0.00916718585276853	16
4035735	0.0090206300377364	0.0110585654088883	0.0160082411731927	16
4035897	0.00153339203310452	0.00412674581143172	0.0517253036324826	16
4035916	0.00446048551830677	0.00508752987644138	0.00867896162904079	16
4035985	0.0192585425114693	0.0121849072600415	0.0312573935741562	16
4036067	0.00923472900115717	0.00851092679054071	0.0811267902885727	16
4036155	0.00808452295861945	0.00881193146633928	0.0151017776244919	16
4036286	0.00560488441327193	0.00463627927024626	0.00514753319061373	16
4036338	0.00832464295737767	0.0101587551834268	0.0137491649466209	16
4036608	0.00420095884747303	0.00464925647263663	0.00655131857017064	16
4036985	0.00689332654827822	0.00840498411311984	0.0461365715361548	16
4037038	0.00181628489131707	0.000416999911537678	0.0587529390220305	16
4037303	0.00345331188565177	0.00094829715218322	0.0573406721307269	16
4037394	0.0114617526921727	0.00593080253389102	0.00534132591997897	16
4037525	0.00808452295861945	0.00881193146633928	0.0151017776244919	16
4037568	0.00855432751778065	0.00923631308623935	0.0179266722540128	16
4037918	0.0404488551317101	0.0239460870578632	0.0530207618591875	16
4037989	0.0156796704402883	0.00867810577680421	0.0152576847062743	16
4038012	0.0014999751983502	0.000521432437179679	0.00190799477949792	16
4038040	0.0203358826727969	0.0123504256394353	0.034831093322507	16
4038350	0.0014046226935197	0.0040102811861505	0.0132431516826572	16
4038359	0.00634368973468901	0.00553269363534734	0.00828169489825847	16
4038387	0.0116904064419748	0.0093486347688801	0.0184406014650662	16
4038439	0.00345331188565177	0.00094829715218322	0.0573406721307269	16
4038480	0.000869829020660079	0.00138113729209668	0.0513008356415538	16
4038528	0.00157418093152917	0.00293364799537562	0.00460441753438846	16
4038567	0.0116904064419748	0.0093486347688801	0.0184406014650662	16
4038906	0.0198151326339224	0.0117905063853057	0.031337871420005	16
4038952	0.00100469820927899	0.00112851512676493	0.0551482580656822	16
4039141	0.012670333910937	0.010474946715496	0.0314559820217483	16
4039351	0.0154221099515314	0.0110425897792954	0.0286788928300748	16
4039379	0.00287317757084684	0.00465425023927684	0.0102719917430867	16
4039382	0.00106007695365689	0.00242725677596638	3.24074691220372e-06	16
4039383	0.0326226097641659	0.0201221425459025	0.0429187559723853	16
4039593	0.00153193324235792	0.00134669834472704	0.00133882979778826	16
4039968	0.0133299654810997	0.00723590816508252	0.00785075788630089	16
4040192	0.00100469820927899	0.00112851512676493	0.0551482580656822	16
4040219	0.0154221099515314	0.0110425897792954	0.0286788928300748	16
4040360	0.0131495081852282	0.00988772005124399	0.0189558949754488	16
4040450	0.0154221099515314	0.0110425897792954	0.0286788928300748	16
4041332	0.00397863125600926	0.00767350638391759	0.024919286039355	16
4041760	0.0229134384796998	0.0155404133013109	0.0323264931940381	16
4041995	0.00123513047458671	0.00180891223724233	0.00984388043677267	16
4042049	0.000979123946012672	0.00201617467961249	0.00767469327358867	16
4042449	0.00578248854129454	0.00467816120475709	0.00492887838910067	16
4042470	0.00632072490932457	0.00527685332002074	0.00577945686012784	16
4042708	0.00287391714650202	0.00172805162031426	0.0018627483418117	16
4042810	0.0340742946428209	0.0220927686529131	0.0540794276723216	16
4042995	0.0020151521551091	0.000831764044914908	0.00250886748356574	16
4043011	0.00620733217297504	0.00587050788762099	0.0506252222706867	16
4043091	0.00325668149765822	0.00236677999174242	0.00374840334865453	16
4043175	0.0167094331990894	0.00969890055497818	0.0137911400043705	16
4043241	0.0203411258425829	0.0123547242774078	0.0347112560769115	16
4043292	0.019372758835775	0.0146544054334505	0.0418802463602409	16
4043701	0.0127829198143635	0.00959908838356179	0.0177207275333568	16
4043980	0.0126201999256439	0.00920825340979562	0.0159419519584059	16
4044038	0.0117733654973946	0.0163777423628061	0.0286583824484479	16
4044284	0.000477002760569579	0.00213833125386717	0.00381362517480174	16
4044803	0.00340420513154985	0.00422358552233954	0.0535225008343552	16
4045116	0.0020151521551091	0.000831764044914908	0.00250886748356574	16
4045272	0.0296206448137284	0.0214485679412543	0.0645471694985133	16
4045367	0.0385452214188466	0.0240108685904685	0.0581514285605	16
4045499	0.00946432346083843	0.0114232258695364	0.0193304031282666	16
4045687	0.00246504831420544	0.00367979679795238	0.0488047301432365	16
4046041	0.0042592320507991	0.0015953630049142	0.0523703187135778	16
4046570	0.00467091532656375	0.00167748053825203	0.0321453799007018	16
4046952	0.00319662582415405	0.00412925000615847	0.00189730123873864	16
4047118	0.0493735766562251	0.0265285117901953	0.0609168239114669	16
4047217	0.00127937766794819	0.00145994442824234	0.00101235326615491	16
4047700	0.00245420761460694	0.00390405776959702	0.00686826121358212	16
4047746	0.0489292173707236	0.0258999985801294	0.0578077259337689	16
4047804	0.00197049494795503	0.000807841890660573	0.03323736058797	16
4048020	0.00192067744468559	0.000863130234043393	0.000124628409139622	16
4048218	0.00273487640715365	0.00507911151624718	0.000753150869634933	16
4048602	0.0544568700868283	0.028716575704492	0.0623865501053182	16
4048634	0.000210309763084285	0.000681378593711148	0.00212898877496773	16
4049019	0.0014999751983502	0.000521432437179679	0.00190799477949792	16
4049159	0.0408426813740876	0.0244826876828466	0.0615617048727505	16
4049365	0.0509406415382824	0.0283564905552083	0.0697786300902666	16
4049439	0.0457157544252789	0.0249070957256209	0.0565934174720895	16
4049840	0.00192067744468559	0.000863130234043393	0.000124628409139622	16
4050383	0.00323152765741947	0.00504055275825672	0.00169480133373369	16
4050688	0.00326899142950076	0.00605018966712511	0.00161413490787718	16
4050716	0.00245420761460694	0.00390405776959702	0.00686826121358212	16
4051089	0.00192067744468559	0.000863130234043393	0.000124628409139622	16
4051164	0.00245420761460694	0.00390405776959702	0.00686826121358212	16
4051189	0.00616301057180325	0.00704385328088091	0.0122397573974602	16
4051261	0.0517668932265892	0.0239394397685651	0.0426276184096437	16
4051312	0.00245420761460694	0.00390405776959702	0.00686826121358212	16
4051324	0.00245420761460694	0.00390405776959702	0.00686826121358212	16
4051380	0.0394377861796093	0.0255771875312514	0.0710680159301258	16
4051513	0.0434057588813965	0.0245258988371256	0.053298333747599	16
4051832	0.00417780354227433	0.00304144272184942	0.00748663031136654	16
4052320	0.00325668149765822	0.00236677999174242	0.00374840334865453	16
4052345	0.0040715910119606	0.00788282824018253	0.00309270183956465	16
4052388	0.00417780354227433	0.00304144272184942	0.00748663031136654	16
4052486	0.00573898808056561	0.00660510534151522	0.00861541591810838	16
4052717	0.000111183722872404	0.000519519852531646	0.00180861411077696	16
4053015	0.00245420761460694	0.00390405776959702	0.00686826121358212	16
4053329	0.00417780354227433	0.00304144272184942	0.00748663031136654	16
4053419	0.0014999751983502	0.000521432437179679	0.00190799477949792	16
4053457	0.000111183722872404	0.000519519852531646	0.00180861411077696	16
4053513	0.000111183722872404	0.000519519852531646	0.00180861411077696	16
4053570	0.000111183722872404	0.000519519852531646	0.00180861411077696	16
4054028	0.00245420761460694	0.00390405776959702	0.00686826121358212	16
4054094	0.000782450864709892	0.000752443734350467	0.00179680828916931	16
4054295	0.00327015945979854	0.00121278988128741	0.0037768442540404	16
4054690	0.000962904591787517	0.00210387432067639	0.00136650188111556	16
4055224	0.00325668149765822	0.00236677999174242	0.00374840334865453	16
4055431	0.0485177717046184	0.0284482288716509	0.0766965154339798	16
4055485	0.00259436082374123	0.00403706964815834	0.0114555125971625	16
4055486	0.0059672710273502	0.00502413482619736	0.0289787653399943	16
4056820	0.00501153274729263	0.00523592246868857	0.00830743371604047	16
4056927	0.0040715910119606	0.00788282824018253	0.00309270183956465	16
4057004	0.00281649666924202	0.00194885785770193	0.00175135352727546	16
4057133	0.00325111168930462	0.00238524223322591	0.00290634128788691	16
4057144	0.00586373922760626	0.0090496326181115	0.00914117119071528	16
4057603	0.0379533783993629	0.0260148174767007	0.0820834643067233	16
4057637	0.00143240302503976	0.00563049447777911	0.000977692231584447	16
4057703	0.00501153274729263	0.00523592246868857	0.00830743371604047	16
4057707	0.0282572400822465	0.0200770867620507	0.0585793743982648	16
4057744	0.00501153274729263	0.00523592246868857	0.00830743371604047	16
4057765	0.00501153274729263	0.00523592246868857	0.00830743371604047	16
4057767	0.00501153274729263	0.00523592246868857	0.00830743371604047	16
4057778	0.00501153274729263	0.00523592246868857	0.00830743371604047	16
4057875	0.00325668149765822	0.00236677999174242	0.00374840334865453	16
4057895	0.00207111761889626	0.00027461991389363	0.000463955045980194	16
4057918	0.00501153274729263	0.00523592246868857	0.00830743371604047	16
4057983	0.00501153274729263	0.00523592246868857	0.00830743371604047	16
4058047	0.00501153274729263	0.00523592246868857	0.00830743371604047	16
4058058	0.00501153274729263	0.00523592246868857	0.00830743371604047	16
4058769	0.0523700636760766	0.0273571630373341	0.0615084084388619	16
4059401	0.00501153274729263	0.00523592246868857	0.00830743371604047	16
4059439	0.0463793893535437	0.0263967972595022	0.059705075121694	16
4059715	0.0471237671614215	0.0233087441934328	0.0425338758552762	16
4059746	0.00245420761460694	0.00390405776959702	0.00686826121358212	16
4060301	0.0523700636760766	0.0273571630373341	0.0615084084388619	16
4060335	0.00154684841647066	0.00268714360827704	0.000787864129943667	16
4060661	0.050581652020812	0.0212612042958669	0.033252567296741	16
4060760	0.00325668149765822	0.00236677999174242	0.00374840334865453	16
4060980	0.050581652020812	0.0212612042958669	0.033252567296741	16
4061031	0.0541527615546962	0.0295342681635073	0.0710897334435125	16
4061103	0.00501153274729263	0.00523592246868857	0.00830743371604047	16
4061309	0.000111183722872404	0.000519519852531646	0.00180861411077696	16
4061616	0.0493435382632949	0.026613352718416	0.0609372501687862	16
4061630	0.00298162319651505	0.000147513664593131	0.0148025832836482	16
4061908	0.00325668149765822	0.00236677999174242	0.00374840334865453	16
4061912	0.00325668149765822	0.00236677999174242	0.00374840334865453	16
4062436	0.0578687080806639	0.0266882506304473	0.0490906751472315	16
4062592	0.0578687080806639	0.0266882506304473	0.0490906751472315	16
4062626	0.0073116615532705	0.00523874723465261	0.0357027071339313	16
4063055	0.00441156695156051	0.00865249831809065	0.00489902434367576	16
4063202	0.0020151521551091	0.000831764044914908	0.00250886748356574	16
4063213	0.0071193377619941	0.00217143666837287	0.000266999830510502	16
4063551	0.00373509046913939	0.00865883279421569	0.00232040565633028	16
4063716	0.00250442046280872	0.00397951109291001	0.0450347178821067	16
4063962	0.0020151521551091	0.000831764044914908	0.00250886748356574	16
4064088	0.00307181774442869	0.000240264133114849	0.0403284646256848	16
4064326	0.000781892962400525	0.00026048045354151	5.94537720764361e-05	16
4064339	0.000610490236006607	0.000133637275761831	0.00191478727096163	16
4064368	0.000111183722872404	0.000519519852531646	0.00180861411077696	16
4064637	0.00420410426672209	0.00180520120978955	0.0159902492059865	16
4064798	0.00521482787845862	0.00530013661154276	0.00673726215720725	16
4064996	0.053652103191632	0.0287736167070081	0.0665839767121079	16
4065065	0.0298338325291469	0.0218963833899061	0.0677662051757568	16
4065184	0.00245420761460694	0.00390405776959702	0.00686826121358212	16
4065412	0.00290149722404402	0.00568662335479016	0.000948334111538821	16
4065495	0.000111183722872404	0.000519519852531646	0.00180861411077696	16
4065583	0.0509919580586026	0.0256351165877337	0.049229637152496	16
4065613	0.0274767105164029	0.0175013594363335	0.0670241891046346	16
4065677	7.09919891452356e-06	0.000735838883491359	0.00205008995308934	16
4065736	0.0216143260106115	0.0188627323257141	0.0895697553221841	16
4065743	0.00325668149765822	0.00236677999174242	0.00374840334865453	16
4065887	0.00245420761460694	0.00390405776959702	0.00686826121358212	16
4065976	0.00325668149765822	0.00236677999174242	0.00374840334865453	16
4065992	0.000863309408825309	0.000639593974503736	0.00236711005067172	16
4066061	0.0193686634832587	0.0175861380114991	0.0919600836070582	16
4066191	0.00271175201752977	0.00413164695765098	0.000754766659670318	16
4066435	0.00028476709925916	0.00329994761295722	0.00240420027067582	16
4066891	0.0523113041198316	0.0272026042894189	0.0548971554675901	16
4066924	0.00325668149765822	0.00236677999174242	0.00374840334865453	16
4066984	0.0020151521551091	0.000831764044914908	0.00250886748356574	16
4067078	0.0114220513949891	0.0109477286706534	0.0369196687853913	16
4067079	0.0114220513949891	0.0109477286706534	0.0369196687853913	16
4067080	0.0114220513949891	0.0109477286706534	0.0369196687853913	16
4067517	0.0186085474684725	0.0140229772320793	0.0366141669807738	16
4067518	0.0186085474684725	0.0140229772320793	0.0366141669807738	16
4067519	0.0186085474684725	0.0140229772320793	0.0366141669807738	16
4067528	0.0282572400822465	0.0200770867620507	0.0585793743982648	16
4068237	0.0482130991727699	0.0280782766221067	0.0725407384082446	16
4068342	0.000111183722872404	0.000519519852531646	0.00180861411077696	16
4068374	0.00369126343854057	0.00750837674105689	0.00232890414914285	16
4068396	0.00245420761460694	0.00390405776959702	0.00686826121358212	16
4068563	0.00369126343854057	0.00750837674105689	0.00232890414914285	16
4068691	0.00245420761460694	0.00390405776959702	0.00686826121358212	16
4068798	0.00325668149765822	0.00236677999174242	0.00374840334865453	16
4068813	0.00175838415466428	0.00105840009307472	0.0110745720537888	16
4069844	0.00429504664422054	0.00593573372807172	0.00395223761455164	16
4069987	0.00155269563868076	0.00337021407982162	0.000856148757348887	16
4070085	0.00469623815463064	0.0025465846640946	0.0111537127005059	16
4070333	0.0351608533296454	0.0233989389883829	0.0700244625280633	16
4070433	0.0421843042936896	0.026471253303986	0.0762119091008789	16
4070497	0.00441156695156051	0.00865249831809065	0.00489902434367576	16
4070872	0.00245420761460694	0.00390405776959702	0.00686826121358212	16
4071461	0.00325668149765822	0.00236677999174242	0.00374840334865453	16
4071658	0.000850743270510323	0.000963844700762886	0.00237456739997831	16
4071722	0.00245420761460694	0.00390405776959702	0.00686826121358212	16
4071929	0.00155269563868076	0.00337021407982162	0.000856148757348887	16
4072015	0.00429504664422054	0.00593573372807172	0.00395223761455164	16
4072538	0.00325668149765822	0.00236677999174242	0.00374840334865453	16
4072616	0.0020151521551091	0.000831764044914908	0.00250886748356574	16
4072774	0.00325668149765822	0.00236677999174242	0.00374840334865453	16
4073152	0.000595518408355079	0.00132973347989648	0.00238049708915597	16
4073188	0.000239766321949262	0.00274281305075329	0.00909357060361311	16
4073469	0.000239766321949262	0.00274281305075329	0.00909357060361311	16
4073638	0.00197078131190735	0.000927445962178602	0.000249262222895495	16
4073670	0.00680666990474813	0.00945407878616823	0.00983731522127876	16
4073842	0.000239766321949262	0.00274281305075329	0.00909357060361311	16
4074238	0.00292311449195424	0.00221874463656891	0.0020831388609252	16
4074258	0.00398202903174478	0.00605894343965058	0.00447119936902552	16
4074304	0.00223082599935248	0.00152423441589656	0.00033852007686836	16
4074612	0.0332262267481613	0.0117326208386567	0.0258773490876547	16
4074908	0.00258653756693358	0.00110895019359145	0.00174505212621168	16
4075152	0.00294703559772705	0.00164017859009355	0.00266160169990305	16
4075438	0.00398202903174478	0.00605894343965058	0.00447119936902552	16
4075656	0.00398202903174478	0.00605894343965058	0.00447119936902552	16
4075906	0.00209427798478365	0.000132053806118951	0.000546384900493821	16
4075912	0.00685681802147522	0.0117542272132161	0.00852311255543086	16
4075930	0.000239766321949262	0.00274281305075329	0.00909357060361311	16
4076047	0.00685681802147522	0.0117542272132161	0.00852311255543086	16
4076094	0.037606523392008	0.0264440065253188	0.0869912733118408	16
4076136	0.00119424914452971	0.00171243910823612	0.00128253563214275	16
4076470	0.00398202903174478	0.00605894343965058	0.00447119936902552	16
4076539	0.00243034712749767	0.00383348836140567	0.0317275722061117	16
4076596	0.043574401152069	0.0262867154093916	0.0640489632878412	16
4076626	0.00491532286577368	0.0139081468718354	0.0053996729315707	16
4076676	0.00588134268169258	0.00675644617701665	0.00892609771789547	16
4076752	0.00265131367753497	0.000661687369085312	0.00197483793887921	16
4076830	0.00588134268169258	0.00675644617701665	0.00892609771789547	16
4077138	0.0098496283573561	0.0307465833549649	0.0105863892447866	16
4077178	0.00457661489146948	0.00314588687857896	0.000771077060469278	16
4077214	0.00325668149765822	0.00236677999174242	0.00374840334865453	16
4077277	0.0103256490810008	0.00140472276910921	0.00099476251291299	16
4077316	0.00451289425172681	0.00196915797011857	0.0207498960591677	16
4077442	0.00737876810792361	0.0051183086262197	0.0673065451265264	16
4077461	0.00616301057180325	0.00704385328088091	0.0122397573974602	16
4077818	0.00107636382855581	0.0021064755574226	0.000770224050522753	16
4078173	0.0135495850735635	0.0047650772389838	0.00950784301283714	16
4078247	0.000477002760569579	0.00213833125386717	0.00381362517480174	16
4078354	0.00298162319651505	0.000147513664593131	0.0148025832836482	16
4078478	0.000477002760569579	0.00213833125386717	0.00381362517480174	16
4078513	0.00662950094335978	0.00887418149507332	0.0950026039743578	16
4078516	0.000477002760569579	0.00213833125386717	0.00381362517480174	16
4078592	0.0020151521551091	0.000831764044914908	0.00250886748356574	16
4078744	0.00952275848664568	0.0101806536413085	0.0508613501779742	16
4079266	0.00308945421672827	0.00278161695830517	0.000357798166923608	16
4079531	8.98937392408517e-06	0.00137730214830082	0.00127849735152048	16
4079616	0.00243492905635868	0.00375536867526271	0.0402893138553533	16
4079618	8.98937392408517e-06	0.00137730214830082	0.00127849735152048	16
4079823	0.00836930989964809	0.00945786495808673	0.0655278252936721	16
4080013	0.00167456289369151	0.00093696704252139	0.00024855545446188	16
4080757	0.000477002760569579	0.00213833125386717	0.00381362517480174	16
4081033	0.000477002760569579	0.00213833125386717	0.00381362517480174	16
4081081	0.000477002760569579	0.00213833125386717	0.00381362517480174	16
4081138	0.00198828092682929	0.00140866207738594	0.000380285393823013	16
4081417	0.000477002760569579	0.00213833125386717	0.00381362517480174	16
4082254	0.000477002760569579	0.00213833125386717	0.00381362517480174	16
4082659	0.000551590864070358	0.0017011704472289	0.000991641930818574	16
4082699	0.000477002760569579	0.00213833125386717	0.00381362517480174	16
4083105	0.00173546957487097	0.00161782200331676	0.000881907933688748	16
4083361	0.0116499309822927	0.0115213956277496	0.0718255630408886	16
4083527	0.00357057058420824	0.00147625472123791	0.00120842362419203	16
4084225	0.000477002760569579	0.00213833125386717	0.00381362517480174	16
4084253	0.000377880400084455	0.00218702501170396	0.0003357457876273	16
4084359	0.00167456289369151	0.00093696704252139	0.00024855545446188	16
4084496	0.00143507657465381	0.00140400031578757	0.00218248409863135	16
4086042	0.00668535019169513	0.00478225108489799	0.0108177191961777	16
4086533	0.00157418093152917	0.00293364799537562	0.00460441753438846	16
4086861	0.00348170026047017	0.000820629093643172	0.0677917347561425	16
4086874	0.00157418093152917	0.00293364799537562	0.00460441753438846	16
4086971	0.000206243428223541	0.00280891698697182	0.0748259925627265	16
4087512	0.00494563828316038	0.00582498600562839	0.00604787487547714	16
4087976	0.00599917431519611	0.00349485517940358	0.0723069597213428	16
4088162	0.00377133355041691	0.00440011557146091	0.0278986380108149	16
4088191	0.00363569813534978	0.00578318842623458	0.0748178063269593	16
4088559	0.00157418093152917	0.00293364799537562	0.00460441753438846	16
4088701	0.0020151521551091	0.000831764044914908	0.00250886748356574	16
4088776	0.00157418093152917	0.00293364799537562	0.00460441753438846	16
4089074	0.0083503698132174	0.00929539735986013	0.0730154838718211	16
4089231	0.00645843633512899	0.00796147682095332	0.0802082152139532	16
4089666	0.000477002760569579	0.00213833125386717	0.00381362517480174	16
4089793	0.00157418093152917	0.00293364799537562	0.00460441753438846	16
4091049	0.00363569813534978	0.00578318842623458	0.0748178063269593	16
4091134	0.00532202938241812	0.00707866232697984	0.0758134417356927	16
4091669	0.00157418093152917	0.00293364799537562	0.00460441753438846	16
4091740	0.00157418093152917	0.00293364799537562	0.00460441753438846	16
4091808	0.00805256308038113	0.0300027461234618	0.00840834838648784	16
4091830	0.00157418093152917	0.00293364799537562	0.00460441753438846	16
4091831	0.00157418093152917	0.00293364799537562	0.00460441753438846	16
4091955	0.00157418093152917	0.00293364799537562	0.00460441753438846	16
4092053	0.00157418093152917	0.00293364799537562	0.00460441753438846	16
4092081	0.00157418093152917	0.00293364799537562	0.00460441753438846	16
4092082	0.00157418093152917	0.00293364799537562	0.00460441753438846	16
4092145	0.0154620345459351	0.0108490210370326	0.0287292484895556	16
4092146	0.00552924236702157	0.00730058559031545	0.0677488889469212	16
4092171	0.00157418093152917	0.00293364799537562	0.00460441753438846	16
4092901	0.0020151521551091	0.000831764044914908	0.00250886748356574	16
4093048	0.00363569813534978	0.00578318842623458	0.0748178063269593	16
4093064	0.00608978142101165	0.00770136413956729	0.0754069890614515	16
4093105	0.000477002760569579	0.00213833125386717	0.00381362517480174	16
4093110	0.00140357256590546	0.00146530205978651	0.00757387479091263	16
4093226	0.00157418093152917	0.00293364799537562	0.00460441753438846	16
4093287	0.00666136056393718	0.00218157639591629	0.0036897483914366	16
4093390	0.00157418093152917	0.00293364799537562	0.00460441753438846	16
4093511	0.00157418093152917	0.00293364799537562	0.00460441753438846	16
4093567	0.00157418093152917	0.00293364799537562	0.00460441753438846	16
4093584	0.00171705267894792	0.00105722315645425	0.00299511156101546	16
4093615	0.00157418093152917	0.00293364799537562	0.00460441753438846	16
4093648	0.00157418093152917	0.00293364799537562	0.00460441753438846	16
4093664	0.00157418093152917	0.00293364799537562	0.00460441753438846	16
4093769	0.00157418093152917	0.00293364799537562	0.00460441753438846	16
4094039	0.00799315644469289	0.00996912141929945	0.0138957152769585	16
4094157	0.00157418093152917	0.00293364799537562	0.00460441753438846	16
4094256	0.00157418093152917	0.00293364799537562	0.00460441753438846	16
4094328	0.0157285851550605	0.0111263451080855	0.0303922798345599	16
4094479	0.000204102262804732	0.00291635838451728	0.00823094349685522	16
4094489	0.0088919113741584	0.00820755895617103	0.020739449454983	16
4094794	0.0128355793708421	0.0102753015818322	0.0313813351398904	16
4094803	0.00382735060660499	0.00352146686522257	0.00518646470730215	16
4094844	0.000347236460016157	0.00257369891552534	0.00867515204937381	16
4094924	0.00162869691240573	0.00061795033555498	0.000388710664431601	16
4094953	0.00382735060660499	0.00352146686522257	0.00518646470730215	16
4095126	0.000477002760569579	0.00213833125386717	0.00381362517480174	16
4095234	0.00382735060660499	0.00352146686522257	0.00518646470730215	16
4095271	0.00869712900113789	0.00959948232376421	0.0666068785788113	16
4095732	0.00474098420861411	0.0064748268953076	0.0316934303620001	16
4095762	0.000477002760569579	0.00213833125386717	0.00381362517480174	16
4095809	0.00382735060660499	0.00352146686522257	0.00518646470730215	16
4095821	0.0081899660061491	0.0066447612189138	0.0407451459620573	16
4095822	0.0081899660061491	0.0066447612189138	0.0407451459620573	16
4095988	0.00382735060660499	0.00352146686522257	0.00518646470730215	16
4095989	0.00409262138338588	0.0048892332552038	0.00383701448325511	16
4096302	0.00885622200558766	0.00336535276806337	0.000901348859176513	16
4096325	0.00382735060660499	0.00352146686522257	0.00518646470730215	16
4096368	0.00382735060660499	0.00352146686522257	0.00518646470730215	16
4096394	0.00340649891901029	0.00264113407682949	0.00314995437473905	16
4096485	0.00382735060660499	0.00352146686522257	0.00518646470730215	16
4096511	0.00460128218191605	0.00652776842809017	0.0775958666971241	16
4096541	9.06462042550856e-05	0.00233720927184667	0.000244873022085873	16
4096542	9.06462042550856e-05	0.00233720927184667	0.000244873022085873	16
4096586	0.00382735060660499	0.00352146686522257	0.00518646470730215	16
4096857	0.00382735060660499	0.00352146686522257	0.00518646470730215	16
4096858	0.00382735060660499	0.00352146686522257	0.00518646470730215	16
4096952	0.00382735060660499	0.00352146686522257	0.00518646470730215	16
4097222	0.000985977843247347	0.000181694405523685	0.00214440269341621	16
4097579	0.00382735060660499	0.00352146686522257	0.00518646470730215	16
4097854	0.000477002760569579	0.00213833125386717	0.00381362517480174	16
4097988	0.000477002760569579	0.00213833125386717	0.00381362517480174	16
4098305	0.000347236460016157	0.00257369891552534	0.00867515204937381	16
4098661	0.00382735060660499	0.00352146686522257	0.00518646470730215	16
4098784	0.0016474276819187	0.0013389925756523	0.00131245552141376	16
4098985	0.00382735060660499	0.00352146686522257	0.00518646470730215	16
4099001	0.0127403666743434	0.01207915570552	0.0611956807575339	16
4099566	0.00382735060660499	0.00352146686522257	0.00518646470730215	16
4099981	0.000477002760569579	0.00213833125386717	0.00381362517480174	16
4100268	0.00789684813153371	0.00160105328664748	0.00103379745351447	16
4100353	0.000477002760569579	0.00213833125386717	0.00381362517480174	16
4100422	0.00720592822170377	0.00633466258529492	0.0216408967761823	16
4100583	0.00618083325319607	0.00400575715194937	0.00566516297914452	16
4100900	0.00871804467799203	0.0152867196411981	0.0116130293735923	16
4101005	0.00231733189902077	0.00461962109598604	0.00784734736308751	16
4101083	0.00567774967687259	0.00147080545501029	0.00116993881869678	16
4101243	0.00382735060660499	0.00352146686522257	0.00518646470730215	16
4101300	0.0016474276819187	0.0013389925756523	0.00131245552141376	16
4101386	0.0101966279900423	0.00175837365755566	0.000870369273502986	16
4101660	0.00382735060660499	0.00352146686522257	0.00518646470730215	16
4102069	0.0020151521551091	0.000831764044914908	0.00250886748356574	16
4102450	0.0106274278125149	0.0131959918055966	0.0276087103843406	16
4102689	0.0140971890678854	0.00535357458741548	0.0128973906075001	16
4103699	0.0020151521551091	0.000831764044914908	0.00250886748356574	16
4103871	0.00261418955552888	0.00478969502342145	0.00837142647914971	16
4104299	0.00261418955552888	0.00478969502342145	0.00837142647914971	16
4104389	0.0185456508848594	0.011762957111809	0.0209691049028428	16
4104451	0.00398202903174478	0.00605894343965058	0.00447119936902552	16
4104512	0.0106141533192086	0.0105429222096034	0.0363764404201661	16
4104586	0.00170127301355535	0.00654526577543104	0.000432794367217805	16
4104617	0.0020151521551091	0.000831764044914908	0.00250886748356574	16
4105641	0.000603659090982663	0.00202060799210794	0.000411000030470406	16
4105786	0.0190903307770236	0.0110099677516236	0.0177315473804282	16
4106206	0.0206382029400582	0.0116656487218556	0.0189146669095937	16
4106786	0.00405928107978838	0.00149067038858502	0.0407046041471126	16
4106788	0.00322878665966232	0.0120035943550746	0.00114405488524713	16
4106789	0.00150581019392905	0.00133166388894192	0.0199601299477156	16
4107051	0.00412766202818627	0.00545997394637775	0.0104143419317878	16
4107098	0.0125223172387923	0.00752303253587394	0.00958571779444626	16
4107142	0.010450717739614	0.0078847927512838	0.0136555451337477	16
4107245	0.00325668149765822	0.00236677999174242	0.00374840334865453	16
4107960	0.0020151521551091	0.000831764044914908	0.00250886748356574	16
4107990	0.0159138207412272	0.00841104412931362	0.0104627682252382	16
4108115	0.00148634612794681	0.00211844428122789	0.00090542117587754	16
4108206	0.00520022580326846	0.00642594874694742	0.00849088068603818	16
4108528	0.0010102634527693	0.0018895419198341	0.0081300867520152	16
4108907	0.00151054665265117	0.00220225452283936	0.000695800621498422	16
4109409	0.00148634612794681	0.00211844428122789	0.00090542117587754	16
4109534	0.0173827427036528	0.00954021700362328	0.0133167483498672	16
4109594	0.0176875586237747	0.00884273839572547	0.0108888687185939	16
4109664	0.0176875586237747	0.00884273839572547	0.0108888687185939	16
4109828	0.0100077313318966	0.0150473082797964	0.0214843466456171	16
4110036	0.0104714956855432	0.00671020499765177	0.0076160722403614	16
4110127	0.0020151521551091	0.000831764044914908	0.00250886748356574	16
4110193	0.0102320893791309	0.00624674960798993	0.00626896590786864	16
4110908	0.0020151521551091	0.000831764044914908	0.00250886748356574	16
4111291	0.00148604764586802	0.00171629250321202	0.00102386057142182	16
4111525	0.00229376560065293	0.00690233541895888	0.00342728060319013	16
4113236	0.01938265015542	0.00928411649304277	0.0113247787825738	16
4113332	0.00382735060660499	0.00352146686522257	0.00518646470730215	16
4113452	0.00030154308264431	0.00315602807579865	0.00879285883169375	16
4113482	0.0020151521551091	0.000831764044914908	0.00250886748356574	16
4114276	0.0176875586237747	0.00884273839572547	0.0108888687185939	16
4114709	0.00871181085369406	0.00492154227634989	0.00365122693624997	16
4115028	0.0166363781478445	0.00916124113252055	0.0125457748122493	16
4115493	0.0180774047748961	0.0102649357665784	0.0155756747747854	16
4116588	0.00274204783501166	4.78357086316747e-05	0.00607050499348699	16
4116831	0.00540293485508693	0.00315251154102667	0.0497021084429175	16
4118179	0.0180774047748961	0.0102649357665784	0.0155756747747854	16
4118259	0.0180774047748961	0.0102649357665784	0.0155756747747854	16
4118287	0.0184467479184351	0.00963568504104016	0.0130105416201218	16
4118391	0.0180774047748961	0.0102649357665784	0.0155756747747854	16
4118462	0.0180774047748961	0.0102649357665784	0.0155756747747854	16
4118632	0.00618083325319607	0.00400575715194937	0.00566516297914452	16
4118686	0.0020151521551091	0.000831764044914908	0.00250886748356574	16
4118690	0.00156032017322744	0.00423008671125151	0.0157184264601546	16
4118878	0.0180774047748961	0.0102649357665784	0.0155756747747854	16
4119173	0.00636943800061947	0.00721364880531148	0.0466511418405726	16
4119244	0.00924098812400738	0.00409007530159505	0.00210528536918998	16
4119765	0.0023324309035565	0.00344165101883226	0.00952027460363736	16
4119916	0.00518042220598512	0.00268593672353987	0.0253466985869086	16
4120076	0.00924098812400738	0.00409007530159505	0.00210528536918998	16
4120121	0.00370477588147528	0.000886311651341252	0.00152227649063475	16
4120568	0.0180774047748961	0.0102649357665784	0.0155756747747854	16
4120857	0.0201757135955604	0.0101169798475874	0.0134823967674079	16
4121914	0.00923373101009774	0.00408306581324394	0.00216688399442351	16
4121921	0.00923373101009774	0.00408306581324394	0.00216688399442351	16
4122130	0.00923373101009774	0.00408306581324394	0.00216688399442351	16
4122223	0.0088349909186878	0.00367703840215582	0.00157872750127041	16
4122422	0.0088349909186878	0.00367703840215582	0.00157872750127041	16
4122923	0.0184467479184351	0.00963568504104016	0.0130105416201218	16
4123323	0.013538854813685	0.0133311967059639	0.10547210181541	16
4123420	0.013538854813685	0.0133311967059639	0.10547210181541	16
4123633	0.013538854813685	0.0133311967059639	0.10547210181541	16
4123961	0.0020151521551091	0.000831764044914908	0.00250886748356574	16
4124107	0.0159097196506039	0.0149902719566942	0.102901121061124	16
4124108	0.00371494760448301	0.00101340788794611	0.0414662295364293	16
4124300	0.013538854813685	0.0133311967059639	0.10547210181541	16
4124337	0.0159097196506039	0.0149902719566942	0.102901121061124	16
4124590	0.013538854813685	0.0133311967059639	0.10547210181541	16
4125570	0.00520022580326846	0.00642594874694742	0.00849088068603818	16
4126201	8.5270122158634e-05	0.00273696223032607	0.00196236318527299	16
4126202	0.0184467479184351	0.00963568504104016	0.0130105416201218	16
4126285	0.0020151521551091	0.000831764044914908	0.00250886748356574	16
4126440	0.00417780354227433	0.00304144272184942	0.00748663031136654	16
4126491	0.0023324309035565	0.00344165101883226	0.00952027460363736	16
4126531	0.00285357913521483	0.00530409520953312	0.0361044172228117	16
4126643	0.00285357913521483	0.00530409520953312	0.0361044172228117	16
4126976	0.00285357913521483	0.00530409520953312	0.0361044172228117	16
4127276	0.00744100084517971	0.00823380473949948	0.0271387086369621	16
4127619	0.000663297024440144	0.00364410104250664	0.0218822625394581	16
4128516	0.00744100084517971	0.00823380473949948	0.0271387086369621	16
4128563	0.000385901640708814	0.00250445717363312	0.0131288823178176	16
4128581	0.00617750314163252	0.00744710296126695	0.0264069518631158	16
4128631	0.00744100084517971	0.00823380473949948	0.0271387086369621	16
4128641	0.0201757135955604	0.0101169798475874	0.0134823967674079	16
4128843	0.00744100084517971	0.00823380473949948	0.0271387086369621	16
4128853	0.0201757135955604	0.0101169798475874	0.0134823967674079	16
4128953	0.0186491951518679	0.00889203470845729	0.0105408864676313	16
4129357	0.000121746192741601	0.00288639923255926	0.01891083304386	16
4129362	0.00250323258725321	0.00388065212880775	0.0143443747458838	16
4129915	0.00883849267302473	0.00885988408339774	0.0257193874284341	16
4129972	0.00834489193030384	0.00571138820411866	0.0710020427376942	16
4130155	0.00883849267302473	0.00885988408339774	0.0257193874284341	16
4130193	0.00274204783501166	4.78357086316747e-05	0.00607050499348699	16
4130204	0.00883849267302473	0.00885988408339774	0.0257193874284341	16
4130444	0.00243003250407752	0.000160740099374475	0.00467065479405171	16
4131103	0.002028099617631	0.0042395979042054	0.0834202237244209	16
4131574	0.00140357256590546	0.00146530205978651	0.00757387479091263	16
4131838	0.0145633226709634	0.0106420161689247	0.0210132014531012	16
4131883	0.000589456228871551	0.00293867195796031	0.00236925899255817	16
4131898	0.0190836840144638	0.0118840088478922	0.0205584388395932	16
4132684	0.0038160457381128	0.00112991194077297	0.0466878400562796	16
4132777	0.00867588961132752	0.0156877106013614	0.0131920256863317	16
4132922	0.0109157043950604	0.0156894061973644	0.0251034065987997	16
4133013	0.0187339332656976	0.0109259418089175	0.0167840514040554	16
4133033	0.0187339332656976	0.0109259418089175	0.0167840514040554	16
4133076	0.0187339332656976	0.0109259418089175	0.0167840514040554	16
4133618	0.00417780354227433	0.00304144272184942	0.00748663031136654	16
4134162	0.0187339332656976	0.0109259418089175	0.0167840514040554	16
4134199	0.00263270456915823	0.00474993438910679	0.0205236927627155	16
4134246	0.0191269389544567	0.0113358449811793	0.0180447587893433	16
4134522	0.0176120222755347	0.0118452743744268	0.0220316545628415	16
4134659	0.00417780354227433	0.00304144272184942	0.00748663031136654	16
4134680	0.0038160457381128	0.00112991194077297	0.0466878400562796	16
4135150	0.000477002760569579	0.00213833125386717	0.00381362517480174	16
4135260	0.016033755199325	0.00985598261292883	0.0151146565273347	16
4135294	0.016825834614275	0.00863237531857515	0.0105508718808664	16
4135295	0.000440659713110484	0.0104126237716107	0.00172053342279597	16
4135350	0.016033755199325	0.00985598261292883	0.0151146565273347	16
4135418	0.0176219331488463	0.0102778371468042	0.0155232484798647	16
4135445	0.00274204783501166	4.78357086316747e-05	0.00607050499348699	16
4135562	0.00223905749303862	0.0110412120538543	3.06836497856908e-05	16
4135758	0.00689850669213624	0.00749209502802625	0.0198169624259397	16
4135789	0.00368817178540014	0.000981853145417179	0.0398373137352773	16
4135835	0.00520022580326846	0.00642594874694742	0.00849088068603818	16
4135898	0.0186491951518679	0.00889203470845729	0.0105408864676313	16
4136157	0.00351827926884682	0.0238440415975058	0.00128397440857251	16
4136266	0.0020151521551091	0.000831764044914908	0.00250886748356574	16
4136418	0.00223905749303862	0.0110412120538543	3.06836497856908e-05	16
4136727	0.0178228657146435	0.00802851087413023	0.00856389876091596	16
4136769	0.00417780354227433	0.00304144272184942	0.00748663031136654	16
4136871	0.0135938572563911	0.00936099202058608	0.0172195555197431	16
4136940	0.00295478333046549	0.000858435896109541	0.00190030464623646	16
4136996	0.00274204783501166	4.78357086316747e-05	0.00607050499348699	16
4137019	0.00325668149765822	0.00236677999174242	0.00374840334865453	16
4137259	0.0020151521551091	0.000831764044914908	0.00250886748356574	16
4137262	0.0135938572563911	0.00936099202058608	0.0172195555197431	16
4137771	0.00377491673153496	0.00108336550564276	0.0448628385690316	16
4137856	0.00119497741290798	0.00317657101154765	0.00253905619517306	16
4138378	0.0124919272559903	0.00146543927449078	0.00114061230721032	16
4138473	0.00417780354227433	0.00304144272184942	0.00748663031136654	16
4138477	0.00274204783501166	4.78357086316747e-05	0.00607050499348699	16
4138500	0.00274204783501166	4.78357086316747e-05	0.00607050499348699	16
4139120	0.00913974752927089	0.0119037976506758	0.0211251200001028	16
4139419	0.00417780354227433	0.00304144272184942	0.00748663031136654	16
4139672	0.00142432153382305	0.00148398711052362	0.0448669591921385	16
4139920	0.0205758797219691	0.00753856824059186	0.0134549947670694	16
4140038	0.00373290516811133	0.00103600152750313	0.0430624909619655	16
4140231	0.0161094798492036	0.00674889691311326	0.00601579953128891	16
4140298	0.0160368384152682	0.00765360953490563	0.0081904026844899	16
4140459	0.00274204783501166	4.78357086316747e-05	0.00607050499348699	16
4140932	0.0020151521551091	0.000831764044914908	0.00250886748356574	16
4141127	0.0158872327335429	0.00823262027358415	0.0104941023655579	16
4141233	0.00376675506366468	0.00107498985442017	0.0448038269413889	16
4141277	0.00806328197066048	0.0119611996704534	0.0145064494800445	16
4141728	0.00220371351264389	0.000665838550833829	0.043387120787036	16
4142512	0.00217912896144236	0.000838643393957424	0.0222463160370043	16
4143181	0.00286085104676274	0.0115951299496356	0.000713556772442355	16
4144432	0.00398018181588975	0.00132608309118177	0.0576378332313088	16
4144583	0.016966818742141	0.00764026482237164	0.00779747718594815	16
4144898	0.00274204783501166	4.78357086316747e-05	0.00607050499348699	16
4144956	0.000899332893074123	0.00244269389099219	0.00423826968979757	16
4145141	0.00274204783501166	4.78357086316747e-05	0.00607050499348699	16
4145164	0.0164053215569803	0.00972322694628956	0.0150491873572966	16
4145201	0.00286085104676274	0.0115951299496356	0.000713556772442355	16
4145393	0.00379981091961217	0.0011132516787579	0.0465705280806657	16
4145625	0.00274204783501166	4.78357086316747e-05	0.00607050499348699	16
4145641	0.00391907076548848	0.00125381166921743	0.0538309357348934	16
4145644	0.00391907076548848	0.00125381166921743	0.0538309357348934	16
4145949	0.00274204783501166	4.78357086316747e-05	0.00607050499348699	16
4146007	0.00379981091961217	0.0011132516787579	0.0465705280806657	16
4146101	0.00391907076548848	0.00125381166921743	0.0538309357348934	16
4146695	0.00244713107739682	0.0159160769154651	0.000189447743414231	16
4147394	0.00398018181588975	0.00132608309118177	0.0576378332313088	16
4147523	0.0168252207377278	0.00847267281071733	0.0101260809690132	16
4147630	0.0168252207377278	0.00847267281071733	0.0101260809690132	16
4147983	0.011400497665153	0.0167362865537481	0.0245585329318736	16
4148158	0.011400497665153	0.0167362865537481	0.0245585329318736	16
4148240	0.00449372905179184	0.0031308701849494	0.0121088008649892	16
4148242	0.00417780354227433	0.00304144272184942	0.00748663031136654	16
4148297	0.00398018181588975	0.00132608309118177	0.0576378332313088	16
4148407	0.011400497665153	0.0167362865537481	0.0245585329318736	16
4148434	0.00341845301147618	0.0144512324900185	0.00133972555980241	16
4148478	0.0019910825822739	0.00354415904880625	0.00358608685680179	16
4148617	0.00325668149765822	0.00236677999174242	0.00374840334865453	16
4148689	0.00341845301147618	0.0144512324900185	0.00133972555980241	16
4148724	0.00398018181588975	0.00132608309118177	0.0576378332313088	16
4149014	0.00402379873909784	0.00432754534464489	0.0110831156230184	16
4149095	0.00209567295496349	0.00349585371756398	0.00330129448224812	16
4149131	0.00325668149765822	0.00236677999174242	0.00374840334865453	16
4149175	0.00341845301147618	0.0144512324900185	0.00133972555980241	16
4149324	0.00870407661058678	0.00852054185839829	0.0217247786716121	16
4149767	0.00854392888906388	0.0170568390757275	0.0145291194256005	16
4150161	0.016123207949758	0.00766363831039704	0.0179033779657282	16
4150427	0.00216738484989997	0.00371893433640403	0.00420923817856093	16
4150448	0.0168252207377278	0.00847267281071733	0.0101260809690132	16
4150479	0.00274204783501166	4.78357086316747e-05	0.00607050499348699	16
4150520	0.00251035907390459	0.00425368585537164	0.0078620145520468	16
4150530	0.00393527040797313	0.00127043004835251	0.0539459568444852	16
4150609	0.0020151521551091	0.000831764044914908	0.00250886748356574	16
4150690	0.00387259802911847	0.00119686844209565	0.0502376409984364	16
4151587	0.000719977122502853	0.0103742238455647	0.00265497054052929	16
4151597	0.00216738484989997	0.00371893433640403	0.00420923817856093	16
4151670	0.0020151521551091	0.000831764044914908	0.00250886748356574	16
4151999	0.00783315323073497	0.0133264289023685	0.0138502693269845	16
4152190	0.000861935397786547	0.012638035888762	0.00279194003946085	16
4152318	0.000719977122502853	0.0103742238455647	0.00265497054052929	16
4152718	0.0168252207377278	0.00847267281071733	0.0101260809690132	16
4153153	0.00854392888906388	0.0170568390757275	0.0145291194256005	16
4153206	0.00378310232214506	0.00109176514675412	0.0449218259916471	16
4153389	0.00854392888906388	0.0170568390757275	0.0145291194256005	16
4153524	0.0168252207377278	0.00847267281071733	0.0101260809690132	16
4153687	0.00382735060660499	0.00352146686522257	0.00518646470730215	16
4153808	0.0037576193070485	0.00106136168017614	0.0432404982327362	16
4154029	0.00859137364924671	0.00443019116621414	0.00608411044507548	16
4154338	0.0168252207377278	0.00847267281071733	0.0101260809690132	16
4154536	0.000269641293463342	0.0113661457557598	0.00190860873030834	16
4154551	0.00940693171900722	0.00868886682732431	0.0324584270127049	16
4154851	0.0026014346353226	0.000213784402026284	0.0421025981515796	16
4154914	0.0027491888685317	0.00531811329406486	0.0468835934740025	16
4155082	0.0161094798492036	0.00674889691311326	0.00601579953128891	16
4155170	0.00520022580326846	0.00642594874694742	0.00849088068603818	16
4155419	0.0200431156431266	0.00990367810956663	0.0131067657112011	16
4155538	0.00161920415752454	0.00138983932127631	0.0223976126881615	16
4155599	0.00355488471686285	0.006950277650278	0.00208567240603876	16
4155763	0.00811996706771749	0.00681187204929564	0.046275904984449	16
4155830	0.0020151521551091	0.000831764044914908	0.00250886748356574	16
4156409	0.0020151521551091	0.000831764044914908	0.00250886748356574	16
4156423	0.0075311753987076	0.00895651495658954	0.0994123937843588	16
4156535	0.00274204783501166	4.78357086316747e-05	0.00607050499348699	16
4156602	0.0027084123762296	0.00085748254459686	0.00398418222562967	16
4156809	0.000477002760569579	0.00213833125386717	0.00381362517480174	16
4156857	0.00261633898783488	0.000883121508577892	0.00173521524197544	16
4157696	0.0107719341583316	0.00926775718526984	0.0698099534846113	16
4157789	0.0020151521551091	0.000831764044914908	0.00250886748356574	16
4157869	0.00413531599619205	0.00614756613933805	0.0255839291646074	16
4158539	0.00810002540735191	0.0110511757821788	0.0168991891612383	16
4160146	0.0020151521551091	0.000831764044914908	0.00250886748356574	16
4160316	0.0078622935526887	0.0213403284678512	0.00935755984327364	16
4160370	0.000866140744522309	0.00378696288699734	0.0344376824899773	16
4160538	0.0100077313318966	0.0150473082797964	0.0214843466456171	16
4160810	0.000477002760569579	0.00213833125386717	0.00381362517480174	16
4161793	0.00345223634086859	0.00393934408480767	0.00374014405711977	16
4161807	0.00135359655747072	0.00149782024855989	0.000931963118588678	16
4162045	0.00810002540735191	0.0110511757821788	0.0168991891612383	16
4162185	0.0142348904196257	0.0143397783381478	0.0685236306976461	16
4162526	0.0020151521551091	0.000831764044914908	0.00250886748356574	16
4162760	0.0160191763133863	0.0166759749793491	0.0733897250868263	16
4162807	0.0020151521551091	0.000831764044914908	0.00250886748356574	16
4163172	0.000695295336947494	0.00215474648336247	0.00141372512607757	16
4163173	0.017265988528448	0.0140693180804361	0.052845453176344	16
4163174	0.0153684142998999	0.0152087705556953	0.0865878946679571	16
4163202	0.0020151521551091	0.000831764044914908	0.00250886748356574	16
4164337	0.00325668149765822	0.00236677999174242	0.00374840334865453	16
4164364	0.00181701850617936	0.000528637787488248	0.0895458504269198	16
4165257	0.0020151521551091	0.000831764044914908	0.00250886748356574	16
4165817	0.00497985486683558	0.00382894659242953	0.0110911872599539	16
4166023	0.00879833080453741	0.0076935534662628	0.0334307376943786	16
4166743	0.00497985486683558	0.00382894659242953	0.0110911872599539	16
4167011	0.00941177231821367	0.00823205134603997	0.0367424171024336	16
4167239	0.0143028779846118	0.00727256010321097	0.00781073647615783	16
4167652	0.0159009909260824	0.00767355817102447	0.00821040449265559	16
4167677	0.00295478333046549	0.000858435896109541	0.00190030464623646	16
4167739	0.00119894614656147	0.00104761756456129	0.157785971319332	16
4167899	0.00493623675817479	0.00255473000346152	0.0216008258785994	16
4168170	0.00493623675817479	0.00255473000346152	0.0216008258785994	16
4168190	0.00119894614656147	0.00104761756456129	0.157785971319332	16
4168592	0.0118132039767744	0.0103686648438987	0.0371030640324378	16
4168657	0.00493623675817479	0.00255473000346152	0.0216008258785994	16
4168673	0.00452223160909478	0.00632787162571326	0.14842471096117	16
4169221	0.0118132039767744	0.0103686648438987	0.0371030640324378	16
4169225	0.00497985486683558	0.00382894659242953	0.0110911872599539	16
4169251	0.00802729552800194	0.00580235781442491	0.0849038337673485	16
4169262	0.0118132039767744	0.0103686648438987	0.0371030640324378	16
4169317	0.0020151521551091	0.000831764044914908	0.00250886748356574	16
4169389	0.0118132039767744	0.0103686648438987	0.0371030640324378	16
4169574	0.0118132039767744	0.0103686648438987	0.0371030640324378	16
4169684	0.0159009909260824	0.00767355817102447	0.00821040449265559	16
4170104	0.00119894614656147	0.00104761756456129	0.157785971319332	16
4170105	0.0020151521551091	0.000831764044914908	0.00250886748356574	16
4170161	0.00119894614656147	0.00104761756456129	0.157785971319332	16
4170411	0.0159009909260824	0.00767355817102447	0.00821040449265559	16
4170523	6.26610369945822e-05	0.00271609398595467	0.0305741228081889	16
4170605	0.00119894614656147	0.00104761756456129	0.157785971319332	16
4170649	0.0020151521551091	0.000831764044914908	0.00250886748356574	16
4170898	0.0133475685230362	0.0093881542671304	0.0172482767079711	16
4171015	0.00325668149765822	0.00236677999174242	0.00374840334865453	16
4171105	0.0133475685230362	0.0093881542671304	0.0172482767079711	16
4171254	0.0020151521551091	0.000831764044914908	0.00250886748356574	16
4171260	0.0103250186024081	0.00785904103943725	0.0154681976435029	16
4171618	0.00274204783501166	4.78357086316747e-05	0.00607050499348699	16
4171701	0.0133475685230362	0.0093881542671304	0.0172482767079711	16
4171880	0.0198427405775943	0.020273291829932	0.116536427211967	16
4172061	0.0153890287424962	0.0143999884552403	0.110861542629743	16
4172887	0.0198427405775943	0.020273291829932	0.116536427211967	16
4172954	0.0159009909260824	0.00767355817102447	0.00821040449265559	16
4172966	0.0198427405775943	0.020273291829932	0.116536427211967	16
4173093	0.00274204783501166	4.78357086316747e-05	0.00607050499348699	16
4173213	0.0159690141157678	0.00677100583497153	0.0060378357412708	16
4173337	0.000532364421226132	0.00147948696352415	0.0675485390113138	16
4173495	0.0020151521551091	0.000831764044914908	0.00250886748356574	16
4173628	0.0118323224188884	0.0103563831972237	0.0877528325026787	16
4173727	0.00730395330727218	0.00556211164134757	0.026567908946647	16
4173818	0.0020151521551091	0.000831764044914908	0.00250886748356574	16
4174016	0.000477002760569579	0.00213833125386717	0.00381362517480174	16
4174324	0.00398202903174478	0.00605894343965058	0.00447119936902552	16
4174527	0.0205758797219691	0.00753856824059186	0.0134549947670694	16
4174620	0.0196660322228712	0.00620200081096012	0.004481118870506	16
4174629	0.0020151521551091	0.000831764044914908	0.00250886748356574	16
4174748	0.0133475685230362	0.0093881542671304	0.0172482767079711	16
4174810	0.00518042220598512	0.00268593672353987	0.0253466985869086	16
4175005	0.0178826250371672	0.0184300743881019	0.0947998826343095	16
4175359	0.0178826250371672	0.0184300743881019	0.0947998826343095	16
4175546	0.00274204783501166	4.78357086316747e-05	0.00607050499348699	16
4175596	0.0178826250371672	0.0184300743881019	0.0947998826343095	16
4175638	0.0111616111909532	0.007150993189788	0.00925632269569138	16
4175808	0.0156223081886611	0.00199081318821312	0.000675659775038717	16
4175859	0.00325393402290051	0.000997962162042975	0.146178182644447	16
4176021	0.0178826250371672	0.0184300743881019	0.0947998826343095	16
4176075	0.0167330983217196	0.0167788909462889	0.0965835969363881	16
