# Supplementary material for: A sex-specific evolutionary interaction between ADCY9 and CETP
Source: eLife journal article supplement (doi:10.7554/elife.69198), 2021-10-05
Supplement: supp [file elife-69198-supp-v1.zip › elife_poa_e69198_Figure_3_source_data_1.txt]

CHR	POS1	POS2	N_INDV	R^2
16	4003733	56995236	85	0.00124317
16	4003733	56996158	85	0.00124317
16	4003733	56996211	85	0.000968526
16	4003733	56996288	85	0.000968526
16	4003733	56996649	85	0.0088788
16	4003733	56997233	85	0.00273128
16	4003733	56997369	85	0.001314
16	4003733	56997551	85	0.00129159
16	4003733	56997656	85	6.446e-05
16	4003733	56998572	85	0.0051925
16	4003733	56998761	85	0.00293484
16	4003733	56998918	85	0.00635225
16	4003733	56999258	85	0.0118615
16	4003733	56999328	85	0.00790581
16	4003733	56999949	85	0.00235303
16	4003733	57000145	85	0.00293484
16	4003733	57000284	85	0.00139744
16	4003733	57000696	85	0.0118615
16	4003733	57000885	85	0.0266646
16	4003733	57000938	85	0.00710436
16	4003733	57001216	85	0.00635225
16	4003733	57001387	85	0.00293484
16	4003733	57001438	85	0.00635225
16	4003733	57001516	85	6.446e-05
16	4003733	57001794	85	1.56217e-06
16	4003733	57001985	85	0.00509615
16	4003733	57002404	85	0.00509615
16	4003733	57002663	85	0.0303633
16	4003733	57002732	85	0.0422161
16	4003733	57003025	85	0.00293484
16	4003733	57003146	85	0.0169056
16	4003733	57004889	85	0.00635225
16	4003733	57005301	85	0.00635225
16	4003733	57005479	85	0.00635225
16	4003733	57005620	85	0.00204221
16	4003733	57006305	85	0.00509615
16	4003733	57006378	85	0.0096143
16	4003733	57006590	85	0.0096143
16	4003733	57006829	85	0.0139225
16	4003733	57007446	85	0.00134281
16	4003733	57007451	85	0.00472914
16	4003733	57007512	85	0.00207196
16	4003733	57007610	85	0.00313608
16	4003733	57007734	85	0.00435592
16	4003733	57008048	85	0.00435592
16	4003733	57008227	85	0.00920705
16	4003733	57008287	85	0.00920705
16	4003733	57008498	85	0.00595382
16	4003733	57008508	85	0.00288636
16	4003733	57009195	85	0.00949672
16	4003733	57009376	85	0.00990388
16	4003733	57009388	85	0.00887005
16	4003733	57009544	85	0.00949672
16	4003733	57009769	85	0.0105446
16	4003733	57009917	85	0.0319117
16	4003733	57009932	85	0.00080595
16	4003733	57009941	85	0.00142873
16	4003733	57009985	85	0.0297107
16	4003733	57009987	85	0.00949672
16	4003733	57010486	85	0.00299016
16	4003733	57010828	85	0.0297107
16	4003733	57010948	85	0.00158334
16	4003733	57011185	85	0.0220597
16	4003733	57011452	85	0.00887005
16	4003733	57011826	85	0.00949672
16	4003733	57011936	85	0.0076982
16	4003733	57012379	85	0.0422479
16	4003733	57012563	85	0.00975497
16	4003733	57012699	85	0.0218226
16	4003733	57013016	85	0.00949672
16	4003733	57014319	85	0.00687992
16	4003733	57014610	85	0.000320493
16	4003733	57014875	85	0.0218226
16	4003733	57015091	85	0.00299016
16	4003733	57015545	85	0.0297107
16	4003733	57016092	85	0.00487982
16	4003733	57016302	85	0.0076982
16	4003733	57016445	85	0.0076982
16	4003733	57016519	85	0.0076982
16	4003733	57016648	85	0.0076982
16	4003733	57017319	85	0.00922379
16	4003733	57017474	85	4.30573e-05
16	4003763	56995236	85	6.8151e-06
16	4003763	56996158	85	6.8151e-06
16	4003763	56996211	85	2.90797e-06
16	4003763	56996288	85	2.90797e-06
16	4003763	56996649	85	0.00427042
16	4003763	56997233	85	0.00154662
16	4003763	56997369	85	0.00506836
16	4003763	56997551	85	0.00416915
16	4003763	56997656	85	3.99208e-06
16	4003763	56998572	85	0.00369463
16	4003763	56998761	85	0.00171659
16	4003763	56998918	85	0.00382325
16	4003763	56999258	85	0.0114422
16	4003763	56999328	85	0.00503811
16	4003763	56999949	85	0.00607895
16	4003763	57000145	85	0.00171659
16	4003763	57000284	85	0.00357323
16	4003763	57000696	85	0.0114422
16	4003763	57000885	85	0.0223743
16	4003763	57000938	85	0.00424853
16	4003763	57001216	85	0.00382325
16	4003763	57001387	85	0.00171659
16	4003763	57001438	85	0.00382325
16	4003763	57001516	85	3.99208e-06
16	4003763	57001794	85	8.32453e-05
16	4003763	57001985	85	0.00910606
16	4003763	57002404	85	0.00910606
16	4003763	57002663	85	0.030087
16	4003763	57002732	85	0.0369255
16	4003763	57003025	85	0.00171659
16	4003763	57003146	85	0.0185352
16	4003763	57004889	85	0.00382325
16	4003763	57005301	85	0.00382325
16	4003763	57005479	85	0.00382325
16	4003763	57005620	85	0.00103548
16	4003763	57006305	85	0.00910606
16	4003763	57006378	85	0.00699928
16	4003763	57006590	85	0.00699928
16	4003763	57006829	85	0.0135226
16	4003763	57007446	85	0.00116444
16	4003763	57007451	85	0.00441223
16	4003763	57007512	85	0.00109207
16	4003763	57007610	85	0.00557775
16	4003763	57007734	85	0.00723941
16	4003763	57008048	85	0.00723941
16	4003763	57008227	85	0.0055895
16	4003763	57008287	85	0.0055895
16	4003763	57008498	85	0.00411201
16	4003763	57008508	85	0.00163444
16	4003763	57009195	85	0.00705635
16	4003763	57009376	85	0.00583546
16	4003763	57009388	85	0.0138041
16	4003763	57009544	85	0.00705635
16	4003763	57009769	85	0.00867368
16	4003763	57009917	85	0.0295254
16	4003763	57009932	85	0.000186706
16	4003763	57009941	85	0.000527083
16	4003763	57009985	85	0.027038
16	4003763	57009987	85	0.00705635
16	4003763	57010486	85	0.00127526
16	4003763	57010828	85	0.027038
16	4003763	57010948	85	0.00242403
16	4003763	57011185	85	0.0237893
16	4003763	57011452	85	0.0138041
16	4003763	57011826	85	0.00705635
16	4003763	57011936	85	0.00547753
16	4003763	57012379	85	0.0390886
16	4003763	57012563	85	0.00762929
16	4003763	57012699	85	0.0297993
16	4003763	57013016	85	0.00705635
16	4003763	57014319	85	0.00371003
16	4003763	57014610	85	1.98485e-05
16	4003763	57014875	85	0.0297993
16	4003763	57015091	85	0.00127526
16	4003763	57015545	85	0.027038
16	4003763	57016092	85	0.00214907
16	4003763	57016302	85	0.00547753
16	4003763	57016445	85	0.00547753
16	4003763	57016519	85	0.00547753
16	4003763	57016648	85	0.00547753
16	4003763	57017319	85	0.00577474
16	4003763	57017474	85	0.000460612
16	4003969	56995236	85	0.00124317
16	4003969	56996158	85	0.00124317
16	4003969	56996211	85	0.000968526
16	4003969	56996288	85	0.000968526
16	4003969	56996649	85	0.0088788
16	4003969	56997233	85	0.00273128
16	4003969	56997369	85	0.001314
16	4003969	56997551	85	0.00129159
16	4003969	56997656	85	6.446e-05
16	4003969	56998572	85	0.0051925
16	4003969	56998761	85	0.00293484
16	4003969	56998918	85	0.00635225
16	4003969	56999258	85	0.0118615
16	4003969	56999328	85	0.00790581
16	4003969	56999949	85	0.00235303
16	4003969	57000145	85	0.00293484
16	4003969	57000284	85	0.00139744
16	4003969	57000696	85	0.0118615
16	4003969	57000885	85	0.0266646
16	4003969	57000938	85	0.00710436
16	4003969	57001216	85	0.00635225
16	4003969	57001387	85	0.00293484
16	4003969	57001438	85	0.00635225
16	4003969	57001516	85	6.446e-05
16	4003969	57001794	85	1.56217e-06
16	4003969	57001985	85	0.00509615
16	4003969	57002404	85	0.00509615
16	4003969	57002663	85	0.0303633
16	4003969	57002732	85	0.0422161
16	4003969	57003025	85	0.00293484
16	4003969	57003146	85	0.0169056
16	4003969	57004889	85	0.00635225
16	4003969	57005301	85	0.00635225
16	4003969	57005479	85	0.00635225
16	4003969	57005620	85	0.00204221
16	4003969	57006305	85	0.00509615
16	4003969	57006378	85	0.0096143
16	4003969	57006590	85	0.0096143
16	4003969	57006829	85	0.0139225
16	4003969	57007446	85	0.00134281
16	4003969	57007451	85	0.00472914
16	4003969	57007512	85	0.00207196
16	4003969	57007610	85	0.00313608
16	4003969	57007734	85	0.00435592
16	4003969	57008048	85	0.00435592
16	4003969	57008227	85	0.00920705
16	4003969	57008287	85	0.00920705
16	4003969	57008498	85	0.00595382
16	4003969	57008508	85	0.00288636
16	4003969	57009195	85	0.00949672
16	4003969	57009376	85	0.00990388
16	4003969	57009388	85	0.00887005
16	4003969	57009544	85	0.00949672
16	4003969	57009769	85	0.0105446
16	4003969	57009917	85	0.0319117
16	4003969	57009932	85	0.00080595
16	4003969	57009941	85	0.00142873
16	4003969	57009985	85	0.0297107
16	4003969	57009987	85	0.00949672
16	4003969	57010486	85	0.00299016
16	4003969	57010828	85	0.0297107
16	4003969	57010948	85	0.00158334
16	4003969	57011185	85	0.0220597
16	4003969	57011452	85	0.00887005
16	4003969	57011826	85	0.00949672
16	4003969	57011936	85	0.0076982
16	4003969	57012379	85	0.0422479
16	4003969	57012563	85	0.00975497
16	4003969	57012699	85	0.0218226
16	4003969	57013016	85	0.00949672
16	4003969	57014319	85	0.00687992
16	4003969	57014610	85	0.000320493
16	4003969	57014875	85	0.0218226
16	4003969	57015091	85	0.00299016
16	4003969	57015545	85	0.0297107
16	4003969	57016092	85	0.00487982
16	4003969	57016302	85	0.0076982
16	4003969	57016445	85	0.0076982
16	4003969	57016519	85	0.0076982
16	4003969	57016648	85	0.0076982
16	4003969	57017319	85	0.00922379
16	4003969	57017474	85	4.30573e-05
16	4003974	56995236	85	0.00825014
16	4003974	56996158	85	0.00825014
16	4003974	56996211	85	0.0048898
16	4003974	56996288	85	0.0048898
16	4003974	56996649	85	0.00194495
16	4003974	56997233	85	0.00690807
16	4003974	56997369	85	0.00190327
16	4003974	56997551	85	0.000380893
16	4003974	56997656	85	0.00199718
16	4003974	56998572	85	4.15169e-05
16	4003974	56998761	85	0.0365671
16	4003974	56998918	85	0.0102094
16	4003974	56999258	85	0.0167257
16	4003974	56999328	85	0.0133856
16	4003974	56999949	85	0.00157087
16	4003974	57000145	85	0.0365671
16	4003974	57000284	85	0.00125443
16	4003974	57000696	85	0.0167257
16	4003974	57000885	85	0.00163798
16	4003974	57000938	85	0.000541233
16	4003974	57001216	85	0.0102094
16	4003974	57001387	85	0.0365671
16	4003974	57001438	85	0.0102094
16	4003974	57001516	85	0.00199718
16	4003974	57001794	85	0.000774417
16	4003974	57001985	85	0
16	4003974	57002404	85	0
16	4003974	57002663	85	0.0170068
16	4003974	57002732	85	0.000182106
16	4003974	57003025	85	0.0365671
16	4003974	57003146	85	0.00167822
16	4003974	57004889	85	0.0102094
16	4003974	57005301	85	0.0102094
16	4003974	57005479	85	0.0102094
16	4003974	57005620	85	0.028534
16	4003974	57006305	85	0
16	4003974	57006378	85	0.00480335
16	4003974	57006590	85	0.00480335
16	4003974	57006829	85	0.0123427
16	4003974	57007446	85	0.0249368
16	4003974	57007451	85	0.0284546
16	4003974	57007512	85	0.0423304
16	4003974	57007610	85	0.0431848
16	4003974	57007734	85	0.0341099
16	4003974	57008048	85	0.0341099
16	4003974	57008227	85	0.0156177
16	4003974	57008287	85	0.0156177
16	4003974	57008498	85	0.030059
16	4003974	57008508	85	0.000202787
16	4003974	57009195	85	0.0223105
16	4003974	57009376	85	0.00233292
16	4003974	57009388	85	0.0136883
16	4003974	57009544	85	0.0223105
16	4003974	57009769	85	0.00258139
16	4003974	57009917	85	0.0142022
16	4003974	57009932	85	0.00583791
16	4003974	57009941	85	0.00325546
16	4003974	57009985	85	0.00102281
16	4003974	57009987	85	0.0223105
16	4003974	57010486	85	0.00294671
16	4003974	57010828	85	0.00102281
16	4003974	57010948	85	0.0115862
16	4003974	57011185	85	0.00151955
16	4003974	57011452	85	0.0136883
16	4003974	57011826	85	0.0223105
16	4003974	57011936	85	0.0157572
16	4003974	57012379	85	0.00202436
16	4003974	57012563	85	0.000801685
16	4003974	57012699	85	0.0204502
16	4003974	57013016	85	0.0223105
16	4003974	57014319	85	0.0146653
16	4003974	57014610	85	0.000810605
16	4003974	57014875	85	0.0204502
16	4003974	57015091	85	0.00294671
16	4003974	57015545	85	0.00102281
16	4003974	57016092	85	0.00372024
16	4003974	57016302	85	0.0157572
16	4003974	57016445	85	0.0157572
16	4003974	57016519	85	0.0157572
16	4003974	57016648	85	0.0157572
16	4003974	57017319	85	0.00392655
16	4003974	57017474	85	0.00392049
16	4004415	56995236	85	0.00486503
16	4004415	56996158	85	0.00486503
16	4004415	56996211	85	0.00381503
16	4004415	56996288	85	0.00381503
16	4004415	56996649	85	0.0105248
16	4004415	56997233	85	0.00545225
16	4004415	56997369	85	4.7176e-05
16	4004415	56997551	85	0.000648162
16	4004415	56997656	85	0.000237528
16	4004415	56998572	85	0.00339392
16	4004415	56998761	85	0.0693512
16	4004415	56998918	85	0.00614703
16	4004415	56999258	85	0.00663323
16	4004415	56999328	85	0.00693364
16	4004415	56999949	85	0.00042036
16	4004415	57000145	85	0.0693512
16	4004415	57000284	85	2.53823e-06
16	4004415	57000696	85	0.00663323
16	4004415	57000885	85	0.0245126
16	4004415	57000938	85	0.00231731
16	4004415	57001216	85	0.00614703
16	4004415	57001387	85	0.0693512
16	4004415	57001438	85	0.00614703
16	4004415	57001516	85	0.000237528
16	4004415	57001794	85	0.002184
16	4004415	57001985	85	0.00282088
16	4004415	57002404	85	0.00282088
16	4004415	57002663	85	0
16	4004415	57002732	85	0.0403707
16	4004415	57003025	85	0.0693512
16	4004415	57003146	85	0.0539107
16	4004415	57004889	85	0.00614703
16	4004415	57005301	85	0.00614703
16	4004415	57005479	85	0.00614703
16	4004415	57005620	85	0.0570516
16	4004415	57006305	85	0.00282088
16	4004415	57006378	85	0.0133055
16	4004415	57006590	85	0.0133055
16	4004415	57006829	85	0.00370287
16	4004415	57007446	85	0.0218125
16	4004415	57007451	85	0.0154564
16	4004415	57007512	85	0.0700236
16	4004415	57007610	85	0.0113254
16	4004415	57007734	85	0.00648812
16	4004415	57008048	85	0.00648812
16	4004415	57008227	85	0.0332321
16	4004415	57008287	85	0.0332321
16	4004415	57008498	85	0.0748943
16	4004415	57008508	85	3.3236e-05
16	4004415	57009195	85	0.0768634
16	4004415	57009376	85	0.0182921
16	4004415	57009388	85	0.000128488
16	4004415	57009544	85	0.0768634
16	4004415	57009769	85	0.00501951
16	4004415	57009917	85	0.0901188
16	4004415	57009932	85	0.00798526
16	4004415	57009941	85	0.00466956
16	4004415	57009985	85	0.0182868
16	4004415	57009987	85	0.0768634
16	4004415	57010486	85	0.000124602
16	4004415	57010828	85	0.0182868
16	4004415	57010948	85	0.018786
16	4004415	57011185	85	0.0488135
16	4004415	57011452	85	0.000128488
16	4004415	57011826	85	0.0768634
16	4004415	57011936	85	0.0629596
16	4004415	57012379	85	0.0246477
16	4004415	57012563	85	0.000585593
16	4004415	57012699	85	0.000372412
16	4004415	57013016	85	0.0768634
16	4004415	57014319	85	0.0285167
16	4004415	57014610	85	0.0008489
16	4004415	57014875	85	0.000372412
16	4004415	57015091	85	0.000124602
16	4004415	57015545	85	0.0182868
16	4004415	57016092	85	0.0135967
16	4004415	57016302	85	0.0629596
16	4004415	57016445	85	0.0629596
16	4004415	57016519	85	0.0629596
16	4004415	57016648	85	0.0629596
16	4004415	57017319	85	0.000736033
16	4004415	57017474	85	0.012622
16	4004515	56995236	85	0.00124317
16	4004515	56996158	85	0.00124317
16	4004515	56996211	85	0.000968526
16	4004515	56996288	85	0.000968526
16	4004515	56996649	85	0.0088788
16	4004515	56997233	85	0.00273128
16	4004515	56997369	85	0.001314
16	4004515	56997551	85	0.00129159
16	4004515	56997656	85	6.446e-05
16	4004515	56998572	85	0.0051925
16	4004515	56998761	85	0.00293484
16	4004515	56998918	85	0.00635225
16	4004515	56999258	85	0.0118615
16	4004515	56999328	85	0.00790581
16	4004515	56999949	85	0.00235303
16	4004515	57000145	85	0.00293484
16	4004515	57000284	85	0.00139744
16	4004515	57000696	85	0.0118615
16	4004515	57000885	85	0.0266646
16	4004515	57000938	85	0.00710436
16	4004515	57001216	85	0.00635225
16	4004515	57001387	85	0.00293484
16	4004515	57001438	85	0.00635225
16	4004515	57001516	85	6.446e-05
16	4004515	57001794	85	1.56217e-06
16	4004515	57001985	85	0.00509615
16	4004515	57002404	85	0.00509615
16	4004515	57002663	85	0.0303633
16	4004515	57002732	85	0.0422161
16	4004515	57003025	85	0.00293484
16	4004515	57003146	85	0.0169056
16	4004515	57004889	85	0.00635225
16	4004515	57005301	85	0.00635225
16	4004515	57005479	85	0.00635225
16	4004515	57005620	85	0.00204221
16	4004515	57006305	85	0.00509615
16	4004515	57006378	85	0.0096143
16	4004515	57006590	85	0.0096143
16	4004515	57006829	85	0.0139225
16	4004515	57007446	85	0.00134281
16	4004515	57007451	85	0.00472914
16	4004515	57007512	85	0.00207196
16	4004515	57007610	85	0.00313608
16	4004515	57007734	85	0.00435592
16	4004515	57008048	85	0.00435592
16	4004515	57008227	85	0.00920705
16	4004515	57008287	85	0.00920705
16	4004515	57008498	85	0.00595382
16	4004515	57008508	85	0.00288636
16	4004515	57009195	85	0.00949672
16	4004515	57009376	85	0.00990388
16	4004515	57009388	85	0.00887005
16	4004515	57009544	85	0.00949672
16	4004515	57009769	85	0.0105446
16	4004515	57009917	85	0.0319117
16	4004515	57009932	85	0.00080595
16	4004515	57009941	85	0.00142873
16	4004515	57009985	85	0.0297107
16	4004515	57009987	85	0.00949672
16	4004515	57010486	85	0.00299016
16	4004515	57010828	85	0.0297107
16	4004515	57010948	85	0.00158334
16	4004515	57011185	85	0.0220597
16	4004515	57011452	85	0.00887005
16	4004515	57011826	85	0.00949672
16	4004515	57011936	85	0.0076982
16	4004515	57012379	85	0.0422479
16	4004515	57012563	85	0.00975497
16	4004515	57012699	85	0.0218226
16	4004515	57013016	85	0.00949672
16	4004515	57014319	85	0.00687992
16	4004515	57014610	85	0.000320493
16	4004515	57014875	85	0.0218226
16	4004515	57015091	85	0.00299016
16	4004515	57015545	85	0.0297107
16	4004515	57016092	85	0.00487982
16	4004515	57016302	85	0.0076982
16	4004515	57016445	85	0.0076982
16	4004515	57016519	85	0.0076982
16	4004515	57016648	85	0.0076982
16	4004515	57017319	85	0.00922379
16	4004515	57017474	85	4.30573e-05
16	4004793	56995236	85	0.000666545
16	4004793	56996158	85	0.000666545
16	4004793	56996211	85	0.000284411
16	4004793	56996288	85	0.000284411
16	4004793	56996649	85	0.00608371
16	4004793	56997233	85	0.0025533
16	4004793	56997369	85	0.00232552
16	4004793	56997551	85	0.00268068
16	4004793	56997656	85	0.000390442
16	4004793	56998572	85	0.00467505
16	4004793	56998761	85	0.00254066
16	4004793	56998918	85	0.00430563
16	4004793	56999258	85	0.0121167
16	4004793	56999328	85	0.00545981
16	4004793	56999949	85	0.00403549
16	4004793	57000145	85	0.00254066
16	4004793	57000284	85	0.00344864
16	4004793	57000696	85	0.0121167
16	4004793	57000885	85	0.0259377
16	4004793	57000938	85	0.00825605
16	4004793	57001216	85	0.00430563
16	4004793	57001387	85	0.00254066
16	4004793	57001438	85	0.00430563
16	4004793	57001516	85	0.000390442
16	4004793	57001794	85	0.000206067
16	4004793	57001985	85	0.00816427
16	4004793	57002404	85	0.00816427
16	4004793	57002663	85	0.0294263
16	4004793	57002732	85	0.040552
16	4004793	57003025	85	0.00254066
16	4004793	57003146	85	0.0131599
16	4004793	57004889	85	0.00430563
16	4004793	57005301	85	0.00430563
16	4004793	57005479	85	0.00430563
16	4004793	57005620	85	0.0017821
16	4004793	57006305	85	0.00816427
16	4004793	57006378	85	0.00961575
16	4004793	57006590	85	0.00961575
16	4004793	57006829	85	0.0140353
16	4004793	57007446	85	0.00165888
16	4004793	57007451	85	0.00514309
16	4004793	57007512	85	0.00163466
16	4004793	57007610	85	0.00604462
16	4004793	57007734	85	0.00756651
16	4004793	57008048	85	0.00756651
16	4004793	57008227	85	0.00824055
16	4004793	57008287	85	0.00824055
16	4004793	57008498	85	0.00510242
16	4004793	57008508	85	0.00269827
16	4004793	57009195	85	0.00848464
16	4004793	57009376	85	0.00949391
16	4004793	57009388	85	0.0128615
16	4004793	57009544	85	0.00848464
16	4004793	57009769	85	0.0065403
16	4004793	57009917	85	0.017353
16	4004793	57009932	85	0.000943216
16	4004793	57009941	85	0.00155379
16	4004793	57009985	85	0.0337927
16	4004793	57009987	85	0.00848464
16	4004793	57010486	85	0.00380913
16	4004793	57010828	85	0.0337927
16	4004793	57010948	85	0.000405432
16	4004793	57011185	85	0.0249618
16	4004793	57011452	85	0.0128615
16	4004793	57011826	85	0.00848464
16	4004793	57011936	85	0.00693106
16	4004793	57012379	85	0.0466507
16	4004793	57012563	85	0.00696563
16	4004793	57012699	85	0.0277235
16	4004793	57013016	85	0.00848464
16	4004793	57014319	85	0.00623755
16	4004793	57014610	85	0.000299608
16	4004793	57014875	85	0.0277235
16	4004793	57015091	85	0.00380913
16	4004793	57015545	85	0.0337927
16	4004793	57016092	85	0.00472923
16	4004793	57016302	85	0.00693106
16	4004793	57016445	85	0.00693106
16	4004793	57016519	85	0.00693106
16	4004793	57016648	85	0.00693106
16	4004793	57017319	85	0.0107948
16	4004793	57017474	85	9.46224e-06
16	4005324	56995236	85	8.51743e-05
16	4005324	56996158	85	8.51743e-05
16	4005324	56996211	85	3.91296e-06
16	4005324	56996288	85	3.91296e-06
16	4005324	56996649	85	0.00349206
16	4005324	56997233	85	0.00138793
16	4005324	56997369	85	0.00300152
16	4005324	56997551	85	0.0036356
16	4005324	56997656	85	0.000666972
16	4005324	56998572	85	0.00305593
16	4005324	56998761	85	5.65461e-05
16	4005324	56998918	85	0.0069515
16	4005324	56999258	85	0.018643
16	4005324	56999328	85	0.00841212
16	4005324	56999949	85	0.00515466
16	4005324	57000145	85	5.65461e-05
16	4005324	57000284	85	0.00490873
16	4005324	57000696	85	0.018643
16	4005324	57000885	85	0.0222981
16	4005324	57000938	85	0.00650694
16	4005324	57001216	85	0.0069515
16	4005324	57001387	85	5.65461e-05
16	4005324	57001438	85	0.0069515
16	4005324	57001516	85	0.000666972
16	4005324	57001794	85	0.000495819
16	4005324	57001985	85	0.0101882
16	4005324	57002404	85	0.0101882
16	4005324	57002663	85	0.0388494
16	4005324	57002732	85	0.0358202
16	4005324	57003025	85	5.65461e-05
16	4005324	57003146	85	0.0118064
16	4005324	57004889	85	0.0069515
16	4005324	57005301	85	0.0069515
16	4005324	57005479	85	0.0069515
16	4005324	57005620	85	1.06588e-07
16	4005324	57006305	85	0.0101882
16	4005324	57006378	85	0.00744155
16	4005324	57006590	85	0.00744155
16	4005324	57006829	85	0.0210145
16	4005324	57007446	85	0.0018739
16	4005324	57007451	85	0.00549383
16	4005324	57007512	85	0.000578423
16	4005324	57007610	85	0.00801658
16	4005324	57007734	85	0.00970613
16	4005324	57008048	85	0.00970613
16	4005324	57008227	85	0.00447944
16	4005324	57008287	85	0.00447944
16	4005324	57008498	85	0.00298664
16	4005324	57008508	85	0.00146674
16	4005324	57009195	85	0.00575076
16	4005324	57009376	85	0.00560702
16	4005324	57009388	85	0.0154805
16	4005324	57009544	85	0.00575076
16	4005324	57009769	85	0.00269844
16	4005324	57009917	85	0.0191545
16	4005324	57009932	85	0.000366487
16	4005324	57009941	85	0.000743417
16	4005324	57009985	85	0.0281426
16	4005324	57009987	85	0.00575076
16	4005324	57010486	85	0.00263826
16	4005324	57010828	85	0.0281426
16	4005324	57010948	85	0.000113934
16	4005324	57011185	85	0.0232532
16	4005324	57011452	85	0.0154805
16	4005324	57011826	85	0.00575076
16	4005324	57011936	85	0.0045306
16	4005324	57012379	85	0.0398887
16	4005324	57012563	85	0.00349948
16	4005324	57012699	85	0.0316823
16	4005324	57013016	85	0.00575076
16	4005324	57014319	85	0.00304468
16	4005324	57014610	85	1.44163e-05
16	4005324	57014875	85	0.0316823
16	4005324	57015091	85	0.00263826
16	4005324	57015545	85	0.0281426
16	4005324	57016092	85	0.00212458
16	4005324	57016302	85	0.0045306
16	4005324	57016445	85	0.0045306
16	4005324	57016519	85	0.0045306
16	4005324	57016648	85	0.0045306
16	4005324	57017319	85	0.00890376
16	4005324	57017474	85	0.000211278
16	4005521	56995236	85	8.51743e-05
16	4005521	56996158	85	8.51743e-05
16	4005521	56996211	85	3.91296e-06
16	4005521	56996288	85	3.91296e-06
16	4005521	56996649	85	0.00349206
16	4005521	56997233	85	0.00138793
16	4005521	56997369	85	0.00300152
16	4005521	56997551	85	0.0036356
16	4005521	56997656	85	0.000666972
16	4005521	56998572	85	0.00305593
16	4005521	56998761	85	5.65461e-05
16	4005521	56998918	85	0.0069515
16	4005521	56999258	85	0.018643
16	4005521	56999328	85	0.00841212
16	4005521	56999949	85	0.00515466
16	4005521	57000145	85	5.65461e-05
16	4005521	57000284	85	0.00490873
16	4005521	57000696	85	0.018643
16	4005521	57000885	85	0.0222981
16	4005521	57000938	85	0.00650694
16	4005521	57001216	85	0.0069515
16	4005521	57001387	85	5.65461e-05
16	4005521	57001438	85	0.0069515
16	4005521	57001516	85	0.000666972
16	4005521	57001794	85	0.000495819
16	4005521	57001985	85	0.0101882
16	4005521	57002404	85	0.0101882
16	4005521	57002663	85	0.0388494
16	4005521	57002732	85	0.0358202
16	4005521	57003025	85	5.65461e-05
16	4005521	57003146	85	0.0118064
16	4005521	57004889	85	0.0069515
16	4005521	57005301	85	0.0069515
16	4005521	57005479	85	0.0069515
16	4005521	57005620	85	1.06588e-07
16	4005521	57006305	85	0.0101882
16	4005521	57006378	85	0.00744155
16	4005521	57006590	85	0.00744155
16	4005521	57006829	85	0.0210145
16	4005521	57007446	85	0.0018739
16	4005521	57007451	85	0.00549383
16	4005521	57007512	85	0.000578423
16	4005521	57007610	85	0.00801658
16	4005521	57007734	85	0.00970613
16	4005521	57008048	85	0.00970613
16	4005521	57008227	85	0.00447944
16	4005521	57008287	85	0.00447944
16	4005521	57008498	85	0.00298664
16	4005521	57008508	85	0.00146674
16	4005521	57009195	85	0.00575076
16	4005521	57009376	85	0.00560702
16	4005521	57009388	85	0.0154805
16	4005521	57009544	85	0.00575076
16	4005521	57009769	85	0.00269844
16	4005521	57009917	85	0.0191545
16	4005521	57009932	85	0.000366487
16	4005521	57009941	85	0.000743417
16	4005521	57009985	85	0.0281426
16	4005521	57009987	85	0.00575076
16	4005521	57010486	85	0.00263826
16	4005521	57010828	85	0.0281426
16	4005521	57010948	85	0.000113934
16	4005521	57011185	85	0.0232532
16	4005521	57011452	85	0.0154805
16	4005521	57011826	85	0.00575076
16	4005521	57011936	85	0.0045306
16	4005521	57012379	85	0.0398887
16	4005521	57012563	85	0.00349948
16	4005521	57012699	85	0.0316823
16	4005521	57013016	85	0.00575076
16	4005521	57014319	85	0.00304468
16	4005521	57014610	85	1.44163e-05
16	4005521	57014875	85	0.0316823
16	4005521	57015091	85	0.00263826
16	4005521	57015545	85	0.0281426
16	4005521	57016092	85	0.00212458
16	4005521	57016302	85	0.0045306
16	4005521	57016445	85	0.0045306
16	4005521	57016519	85	0.0045306
16	4005521	57016648	85	0.0045306
16	4005521	57017319	85	0.00890376
16	4005521	57017474	85	0.000211278
16	4006163	56995236	85	0.0107539
16	4006163	56996158	85	0.0107539
16	4006163	56996211	85	0.0079467
16	4006163	56996288	85	0.0079467
16	4006163	56996649	85	0.00414598
16	4006163	56997233	85	0.00725759
16	4006163	56997369	85	0.00371102
16	4006163	56997551	85	0.00174287
16	4006163	56997656	85	0.000853218
16	4006163	56998572	85	9.90898e-05
16	4006163	56998761	85	0.0388467
16	4006163	56998918	85	0.00719178
16	4006163	56999258	85	0.018085
16	4006163	56999328	85	0.00970932
16	4006163	56999949	85	0.00374926
16	4006163	57000145	85	0.0388467
16	4006163	57000284	85	0.00425624
16	4006163	57000696	85	0.018085
16	4006163	57000885	85	0.00163872
16	4006163	57000938	85	0.000166462
16	4006163	57001216	85	0.00719178
16	4006163	57001387	85	0.0388467
16	4006163	57001438	85	0.00719178
16	4006163	57001516	85	0.000853218
16	4006163	57001794	85	5.13424e-05
16	4006163	57001985	85	0.000728133
16	4006163	57002404	85	0.000728133
16	4006163	57002663	85	0.0173531
16	4006163	57002732	85	0.000220052
16	4006163	57003025	85	0.0388467
16	4006163	57003146	85	0.0035084
16	4006163	57004889	85	0.00719178
16	4006163	57005301	85	0.00719178
16	4006163	57005479	85	0.00719178
16	4006163	57005620	85	0.0301669
16	4006163	57006305	85	0.000728133
16	4006163	57006378	85	0.0046171
16	4006163	57006590	85	0.0046171
16	4006163	57006829	85	0.013301
16	4006163	57007446	85	0.0274795
16	4006163	57007451	85	0.0309024
16	4006163	57007512	85	0.0456738
16	4006163	57007610	85	0.0577488
16	4006163	57007734	85	0.0467174
16	4006163	57008048	85	0.0467174
16	4006163	57008227	85	0.0172101
16	4006163	57008287	85	0.0172101
16	4006163	57008498	85	0.0328404
16	4006163	57008508	85	0.000245042
16	4006163	57009195	85	0.0243418
16	4006163	57009376	85	0.00245096
16	4006163	57009388	85	0.021313
16	4006163	57009544	85	0.0243418
16	4006163	57009769	85	0.00616109
16	4006163	57009917	85	0.0322868
16	4006163	57009932	85	0.00654398
16	4006163	57009941	85	0.0036725
16	4006163	57009985	85	0.00263258
16	4006163	57009987	85	0.0243418
16	4006163	57010486	85	0.0042813
16	4006163	57010828	85	0.00263258
16	4006163	57010948	85	0.01804
16	4006163	57011185	85	0.000554534
16	4006163	57011452	85	0.021313
16	4006163	57011826	85	0.0243418
16	4006163	57011936	85	0.0171596
16	4006163	57012379	85	0.00406801
16	4006163	57012563	85	0.000101898
16	4006163	57012699	85	0.0298519
16	4006163	57013016	85	0.0243418
16	4006163	57014319	85	0.0158571
16	4006163	57014610	85	0.000851618
16	4006163	57014875	85	0.0298519
16	4006163	57015091	85	0.0042813
16	4006163	57015545	85	0.00263258
16	4006163	57016092	85	0.003796
16	4006163	57016302	85	0.0171596
16	4006163	57016445	85	0.0171596
16	4006163	57016519	85	0.0171596
16	4006163	57016648	85	0.0171596
16	4006163	57017319	85	0.00575525
16	4006163	57017474	85	0.00459621
16	4006510	56995236	85	0.0335552
16	4006510	56996158	85	0.0335552
16	4006510	56996211	85	0.0352103
16	4006510	56996288	85	0.0352103
16	4006510	56996649	85	0.0288311
16	4006510	56997233	85	0.00956068
16	4006510	56997369	85	0.00960031
16	4006510	56997551	85	0.0189774
16	4006510	56997656	85	0.000365497
16	4006510	56998572	85	0.0221554
16	4006510	56998761	85	0.0471311
16	4006510	56998918	85	0.000262743
16	4006510	56999258	85	0.00688705
16	4006510	56999328	85	6.80457e-05
16	4006510	56999949	85	0.00792367
16	4006510	57000145	85	0.0471311
16	4006510	57000284	85	0.00632748
16	4006510	57000696	85	0.00688705
16	4006510	57000885	85	0.0126649
16	4006510	57000938	85	0.0194136
16	4006510	57001216	85	0.000591172
16	4006510	57001387	85	0.0471311
16	4006510	57001438	85	0.000591172
16	4006510	57001516	85	0.000365497
16	4006510	57001794	85	0.00226757
16	4006510	57001985	85	0.00339674
16	4006510	57002404	85	0.00339674
16	4006510	57002663	85	0.0017507
16	4006510	57002732	85	0.0191962
16	4006510	57003025	85	0.0471311
16	4006510	57003146	85	0.004914
16	4006510	57004889	85	0.000591172
16	4006510	57005301	85	0.000591172
16	4006510	57005479	85	0.000591172
16	4006510	57005620	85	0.0511727
16	4006510	57006305	85	0.00339674
16	4006510	57006378	85	0.0178006
16	4006510	57006590	85	0.0178006
16	4006510	57006829	85	0.00851154
16	4006510	57007446	85	0.0102681
16	4006510	57007451	85	0.0117166
16	4006510	57007512	85	0.0421767
16	4006510	57007610	85	0.00673401
16	4006510	57007734	85	0.00860238
16	4006510	57008048	85	0.00860238
16	4006510	57008227	85	0.0308563
16	4006510	57008287	85	0.0308563
16	4006510	57008498	85	0.0261866
16	4006510	57008508	85	0.00300601
16	4006510	57009195	85	0.0294178
16	4006510	57009376	85	0.0345821
16	4006510	57009388	85	0.0108058
16	4006510	57009544	85	0.0294178
16	4006510	57009769	85	0
16	4006510	57009917	85	0.0296053
16	4006510	57009932	85	0.00389383
16	4006510	57009941	85	0.00301609
16	4006510	57009985	85	0.0151617
16	4006510	57009987	85	0.0294178
16	4006510	57010486	85	0.00158479
16	4006510	57010828	85	0.0151617
16	4006510	57010948	85	0.00406504
16	4006510	57011185	85	0.00444939
16	4006510	57011452	85	0.0108058
16	4006510	57011826	85	0.0294178
16	4006510	57011936	85	0.0328467
16	4006510	57012379	85	0.0245645
16	4006510	57012563	85	0.000146714
16	4006510	57012699	85	0.00374251
16	4006510	57013016	85	0.0294178
16	4006510	57014319	85	0.0241546
16	4006510	57014610	85	0.000333778
16	4006510	57014875	85	0.00374251
16	4006510	57015091	85	0.00158479
16	4006510	57015545	85	0.0151617
16	4006510	57016092	85	0.0245098
16	4006510	57016302	85	0.0328467
16	4006510	57016445	85	0.0328467
16	4006510	57016519	85	0.0328467
16	4006510	57016648	85	0.0328467
16	4006510	57017319	85	0.00363783
16	4006510	57017474	85	0.000717474
16	4006609	56995236	85	2.16653e-06
16	4006609	56996158	85	2.16653e-06
16	4006609	56996211	85	5.20001e-05
16	4006609	56996288	85	5.20001e-05
16	4006609	56996649	85	0.00310743
16	4006609	56997233	85	0.000632111
16	4006609	56997369	85	0.00244906
16	4006609	56997551	85	0.00282309
16	4006609	56997656	85	0.000411184
16	4006609	56998572	85	0.00205356
16	4006609	56998761	85	2.50579e-05
16	4006609	56998918	85	0.00840778
16	4006609	56999258	85	0.0190169
16	4006609	56999328	85	0.0101239
16	4006609	56999949	85	0.00424988
16	4006609	57000145	85	2.50579e-05
16	4006609	57000284	85	0.00363184
16	4006609	57000696	85	0.0190169
16	4006609	57000885	85	0.0193931
16	4006609	57000938	85	0.00401149
16	4006609	57001216	85	0.00840778
16	4006609	57001387	85	2.50579e-05
16	4006609	57001438	85	0.00840778
16	4006609	57001516	85	0.000411184
16	4006609	57001794	85	0.00255102
16	4006609	57001985	85	0.008598
16	4006609	57002404	85	0.008598
16	4006609	57002663	85	0.0404762
16	4006609	57002732	85	0.0326278
16	4006609	57003025	85	2.50579e-05
16	4006609	57003146	85	0.013859
16	4006609	57004889	85	0.00840778
16	4006609	57005301	85	0.00840778
16	4006609	57005479	85	0.00840778
16	4006609	57005620	85	0.000177683
16	4006609	57006305	85	0.008598
16	4006609	57006378	85	0.00546133
16	4006609	57006590	85	0.00546133
16	4006609	57006829	85	0.0215448
16	4006609	57007446	85	0.00174701
16	4006609	57007451	85	0.00541632
16	4006609	57007512	85	0.000146447
16	4006609	57007610	85	0.00636574
16	4006609	57007734	85	0.00796848
16	4006609	57008048	85	0.00796848
16	4006609	57008227	85	0.00492884
16	4006609	57008287	85	0.00492884
16	4006609	57008498	85	0.00184124
16	4006609	57008508	85	0.00284162
16	4006609	57009195	85	0.00412256
16	4006609	57009376	85	0.00588377
16	4006609	57009388	85	0.0135447
16	4006609	57009544	85	0.00412256
16	4006609	57009769	85	0.00191858
16	4006609	57009917	85	0.0182749
16	4006609	57009932	85	0.000993325
16	4006609	57009941	85	0.00163633
16	4006609	57009985	85	0.0268889
16	4006609	57009987	85	0.00412256
16	4006609	57010486	85	0.0011174
16	4006609	57010828	85	0.0268889
16	4006609	57010948	85	0.000127033
16	4006609	57011185	85	0.0187904
16	4006609	57011452	85	0.0135447
16	4006609	57011826	85	0.00412256
16	4006609	57011936	85	0.00304453
16	4006609	57012379	85	0.0387542
16	4006609	57012563	85	0.00242536
16	4006609	57012699	85	0.0291963
16	4006609	57013016	85	0.00412256
16	4006609	57014319	85	0.0033288
16	4006609	57014610	85	0.000315525
16	4006609	57014875	85	0.0291963
16	4006609	57015091	85	0.0011174
16	4006609	57015545	85	0.0268889
16	4006609	57016092	85	0.00221354
16	4006609	57016302	85	0.00304453
16	4006609	57016445	85	0.00304453
16	4006609	57016519	85	0.00304453
16	4006609	57016648	85	0.00304453
16	4006609	57017319	85	0.00583885
16	4006609	57017474	85	9.96492e-06
16	4006742	56995236	85	0.0075739
16	4006742	56996158	85	0.0075739
16	4006742	56996211	85	0.00448899
16	4006742	56996288	85	0.00448899
16	4006742	56996649	85	0.00178553
16	4006742	56997233	85	0.00634184
16	4006742	56997369	85	0.00174726
16	4006742	56997551	85	0.000349672
16	4006742	56997656	85	0.00183348
16	4006742	56998572	85	3.81139e-05
16	4006742	56998761	85	0.0218998
16	4006742	56998918	85	0.00443002
16	4006742	56999258	85	0.00863704
16	4006742	56999328	85	0.00640968
16	4006742	56999949	85	0.00144211
16	4006742	57000145	85	0.0218998
16	4006742	57000284	85	0.00115161
16	4006742	57000696	85	0.00863704
16	4006742	57000885	85	0.00150372
16	4006742	57000938	85	0.000496869
16	4006742	57001216	85	0.00443002
16	4006742	57001387	85	0.0218998
16	4006742	57001438	85	0.00443002
16	4006742	57001516	85	0.00183348
16	4006742	57001794	85	0.000315973
16	4006742	57001985	85	0
16	4006742	57002404	85	0
16	4006742	57002663	85	0.0087822
16	4006742	57002732	85	0.00016718
16	4006742	57003025	85	0.0218998
16	4006742	57003146	85	0.00154066
16	4006742	57004889	85	0.00443002
16	4006742	57005301	85	0.00443002
16	4006742	57005479	85	0.00443002
16	4006742	57005620	85	0.0160439
16	4006742	57006305	85	0
16	4006742	57006378	85	0.00440963
16	4006742	57006590	85	0.00440963
16	4006742	57006829	85	0.00564591
16	4006742	57007446	85	0.0228928
16	4006742	57007451	85	0.0261222
16	4006742	57007512	85	0.0388607
16	4006742	57007610	85	0.0396451
16	4006742	57007734	85	0.031314
16	4006742	57008048	85	0.031314
16	4006742	57008227	85	0.00832294
16	4006742	57008287	85	0.00832294
16	4006742	57008498	85	0.0275952
16	4006742	57008508	85	0.000418871
16	4006742	57009195	85	0.0204818
16	4006742	57009376	85	0.000301176
16	4006742	57009388	85	0.0125663
16	4006742	57009544	85	0.0204818
16	4006742	57009769	85	0.0023698
16	4006742	57009917	85	0.0344286
16	4006742	57009932	85	0.0113389
16	4006742	57009941	85	0.00789182
16	4006742	57009985	85	0.00375591
16	4006742	57009987	85	0.0204818
16	4006742	57010486	85	0.00270518
16	4006742	57010828	85	0.00375591
16	4006742	57010948	85	0.0203918
16	4006742	57011185	85	0.00139499
16	4006742	57011452	85	0.0125663
16	4006742	57011826	85	0.0204818
16	4006742	57011936	85	0.0144656
16	4006742	57012379	85	0.00546151
16	4006742	57012563	85	0.000735973
16	4006742	57012699	85	0.0187739
16	4006742	57013016	85	0.0204818
16	4006742	57014319	85	0.00757306
16	4006742	57014610	85	4.65101e-05
16	4006742	57014875	85	0.0187739
16	4006742	57015091	85	0.00270518
16	4006742	57015545	85	0.00375591
16	4006742	57016092	85	0.000853825
16	4006742	57016302	85	0.0144656
16	4006742	57016445	85	0.0144656
16	4006742	57016519	85	0.0144656
16	4006742	57016648	85	0.0144656
16	4006742	57017319	85	0.0036047
16	4006742	57017474	85	0.00870902
16	4007086	56995236	85	0.0148674
16	4007086	56996158	85	0.0148674
16	4007086	56996211	85	0.00768933
16	4007086	56996288	85	0.00768933
16	4007086	56996649	85	0.0176971
16	4007086	56997233	85	0.0204938
16	4007086	56997369	85	0.000360558
16	4007086	56997551	85	0.000616536
16	4007086	56997656	85	0.00554724
16	4007086	56998572	85	0.0112653
16	4007086	56998761	85	0.0419738
16	4007086	56998918	85	2.03455e-05
16	4007086	56999258	85	0.000833279
16	4007086	56999328	85	1.39138e-05
16	4007086	56999949	85	0.000570526
16	4007086	57000145	85	0.0419738
16	4007086	57000284	85	0.00110243
16	4007086	57000696	85	0.000833279
16	4007086	57000885	85	0.0475279
16	4007086	57000938	85	0.0132094
16	4007086	57001216	85	2.03455e-05
16	4007086	57001387	85	0.0419738
16	4007086	57001438	85	2.03455e-05
16	4007086	57001516	85	0.00554724
16	4007086	57001794	85	0.000134436
16	4007086	57001985	85	0.0098676
16	4007086	57002404	85	0.0098676
16	4007086	57002663	85	0.0097946
16	4007086	57002732	85	0.0585009
16	4007086	57003025	85	0.0419738
16	4007086	57003146	85	0.0350227
16	4007086	57004889	85	2.03455e-05
16	4007086	57005301	85	2.03455e-05
16	4007086	57005479	85	2.03455e-05
16	4007086	57005620	85	0.0315771
16	4007086	57006305	85	0.0098676
16	4007086	57006378	85	0.0300183
16	4007086	57006590	85	0.0300183
16	4007086	57006829	85	0.00281918
16	4007086	57007446	85	0.00460372
16	4007086	57007451	85	0.00186228
16	4007086	57007512	85	0.0441945
16	4007086	57007610	85	0.00757932
16	4007086	57007734	85	0.00337226
16	4007086	57008048	85	0.00337226
16	4007086	57008227	85	0.0232525
16	4007086	57008287	85	0.0232525
16	4007086	57008498	85	0.0472686
16	4007086	57008508	85	0.000145886
16	4007086	57009195	85	0.0474954
16	4007086	57009376	85	0.00824985
16	4007086	57009388	85	0.000982012
16	4007086	57009544	85	0.0474954
16	4007086	57009769	85	0.0108852
16	4007086	57009917	85	0.0595625
16	4007086	57009932	85	0.00775488
16	4007086	57009941	85	0.0041362
16	4007086	57009985	85	0.0140417
16	4007086	57009987	85	0.0474954
16	4007086	57010486	85	0.000710541
16	4007086	57010828	85	0.0140417
16	4007086	57010948	85	0.0254969
16	4007086	57011185	85	0.0410991
16	4007086	57011452	85	0.000982012
16	4007086	57011826	85	0.0474954
16	4007086	57011936	85	0.0356354
16	4007086	57012379	85	0.0203362
16	4007086	57012563	85	0.00107998
16	4007086	57012699	85	0.00463682
16	4007086	57013016	85	0.0474954
16	4007086	57014319	85	0.0179022
16	4007086	57014610	85	0.000195461
16	4007086	57014875	85	0.00463682
16	4007086	57015091	85	0.000710541
16	4007086	57015545	85	0.0140417
16	4007086	57016092	85	0.00482078
16	4007086	57016302	85	0.0356354
16	4007086	57016445	85	0.0356354
16	4007086	57016519	85	0.0356354
16	4007086	57016648	85	0.0356354
16	4007086	57017319	85	0.00345077
16	4007086	57017474	85	0.0129206
16	4008230	56995236	85	0.00546346
16	4008230	56996158	85	0.00546346
16	4008230	56996211	85	0.00491581
16	4008230	56996288	85	0.00491581
16	4008230	56996649	85	0.00224132
16	4008230	56997233	85	0.0050317
16	4008230	56997369	85	0.00100649
16	4008230	56997551	85	0.000587837
16	4008230	56997656	85	2.93376e-05
16	4008230	56998572	85	0.00425211
16	4008230	56998761	85	0.0510629
16	4008230	56998918	85	0.0156605
16	4008230	56999258	85	0.0204577
16	4008230	56999328	85	0.0192282
16	4008230	56999949	85	5.19195e-05
16	4008230	57000145	85	0.0510629
16	4008230	57000284	85	0.000415757
16	4008230	57000696	85	0.0204577
16	4008230	57000885	85	0.00336921
16	4008230	57000938	85	0.000286216
16	4008230	57001216	85	0.0156605
16	4008230	57001387	85	0.0510629
16	4008230	57001438	85	0.0156605
16	4008230	57001516	85	2.93376e-05
16	4008230	57001794	85	0.00525846
16	4008230	57001985	85	0.000613458
16	4008230	57002404	85	0.000613458
16	4008230	57002663	85	0.0180496
16	4008230	57002732	85	0.0011797
16	4008230	57003025	85	0.0510629
16	4008230	57003146	85	0.00769423
16	4008230	57004889	85	0.0156605
16	4008230	57005301	85	0.0156605
16	4008230	57005479	85	0.0156605
16	4008230	57005620	85	0.0402909
16	4008230	57006305	85	0.000613458
16	4008230	57006378	85	0.00705587
16	4008230	57006590	85	0.00705587
16	4008230	57006829	85	0.0149754
16	4008230	57007446	85	0.0319096
16	4008230	57007451	85	0.0351713
16	4008230	57007512	85	0.0608071
16	4008230	57007610	85	0.0437823
16	4008230	57007734	85	0.033477
16	4008230	57008048	85	0.033477
16	4008230	57008227	85	0.0122575
16	4008230	57008287	85	0.0122575
16	4008230	57008498	85	0.04598
16	4008230	57008508	85	0.00137696
16	4008230	57009195	85	0.0350537
16	4008230	57009376	85	0.0004198
16	4008230	57009388	85	0.00974462
16	4008230	57009544	85	0.0350537
16	4008230	57009769	85	0.00911011
16	4008230	57009917	85	0.0252433
16	4008230	57009932	85	0.0201223
16	4008230	57009941	85	0.01475
16	4008230	57009985	85	0.0023476
16	4008230	57009987	85	0.0350537
16	4008230	57010486	85	0.0039655
16	4008230	57010828	85	0.0023476
16	4008230	57010948	85	0.04786
16	4008230	57011185	85	0.00696674
16	4008230	57011452	85	0.00974462
16	4008230	57011826	85	0.0350537
16	4008230	57011936	85	0.0256711
16	4008230	57012379	85	0.00359815
16	4008230	57012563	85	3.95816e-05
16	4008230	57012699	85	0.0147197
16	4008230	57013016	85	0.0350537
16	4008230	57014319	85	0.0105559
16	4008230	57014610	85	0.000604485
16	4008230	57014875	85	0.0147197
16	4008230	57015091	85	0.0039655
16	4008230	57015545	85	0.0023476
16	4008230	57016092	85	0.000987087
16	4008230	57016302	85	0.0256711
16	4008230	57016445	85	0.0256711
16	4008230	57016519	85	0.0256711
16	4008230	57016648	85	0.0256711
16	4008230	57017319	85	0.00584023
16	4008230	57017474	85	0.0168618
16	4008901	56995236	85	0.00369754
16	4008901	56996158	85	0.00369754
16	4008901	56996211	85	0.00224618
16	4008901	56996288	85	0.00224618
16	4008901	56996649	85	0.00808472
16	4008901	56997233	85	0.00732239
16	4008901	56997369	85	0.000912157
16	4008901	56997551	85	0.00155974
16	4008901	56997656	85	0.000815572
16	4008901	56998572	85	0.0056984
16	4008901	56998761	85	0.0127236
16	4008901	56998918	85	0.00141867
16	4008901	56999258	85	0.00288573
16	4008901	56999328	85	0.00136654
16	4008901	56999949	85	0.00144334
16	4008901	57000145	85	0.0127236
16	4008901	57000284	85	0.000430441
16	4008901	57000696	85	0.00288573
16	4008901	57000885	85	0.0254363
16	4008901	57000938	85	0.00373549
16	4008901	57001216	85	0.00141867
16	4008901	57001387	85	0.0127236
16	4008901	57001438	85	0.00141867
16	4008901	57001516	85	0.000815572
16	4008901	57001794	85	1.56169e-05
16	4008901	57001985	85	0.00660259
16	4008901	57002404	85	0.00660259
16	4008901	57002663	85	0.0139381
16	4008901	57002732	85	0.0327951
16	4008901	57003025	85	0.0127236
16	4008901	57003146	85	0.027489
16	4008901	57004889	85	0.00141867
16	4008901	57005301	85	0.00141867
16	4008901	57005479	85	0.00141867
16	4008901	57005620	85	0.00767512
16	4008901	57006305	85	0.00660259
16	4008901	57006378	85	0.0136019
16	4008901	57006590	85	0.0136019
16	4008901	57006829	85	0.00586194
16	4008901	57007446	85	0.0036321
16	4008901	57007451	85	0.00139231
16	4008901	57007512	85	0.0199419
16	4008901	57007610	85	0.00814214
16	4008901	57007734	85	0.00400526
16	4008901	57008048	85	0.00400526
16	4008901	57008227	85	0.014502
16	4008901	57008287	85	0.014502
16	4008901	57008498	85	0.021329
16	4008901	57008508	85	0.00132496
16	4008901	57009195	85	0.0217155
16	4008901	57009376	85	0.00413488
16	4008901	57009388	85	0.000297679
16	4008901	57009544	85	0.0217155
16	4008901	57009769	85	0.0136617
16	4008901	57009917	85	0.0596979
16	4008901	57009932	85	0.00316113
16	4008901	57009941	85	0.00111707
16	4008901	57009985	85	0.00646195
16	4008901	57009987	85	0.0217155
16	4008901	57010486	85	0.000534811
16	4008901	57010828	85	0.00646195
16	4008901	57010948	85	0.0179673
16	4008901	57011185	85	0.0180201
16	4008901	57011452	85	0.000297679
16	4008901	57011826	85	0.0217155
16	4008901	57011936	85	0.0144779
16	4008901	57012379	85	0.0105443
16	4008901	57012563	85	0.00273219
16	4008901	57012699	85	0.00257749
16	4008901	57013016	85	0.0217155
16	4008901	57014319	85	0.0106467
16	4008901	57014610	85	0.00014712
16	4008901	57014875	85	0.00257749
16	4008901	57015091	85	0.000534811
16	4008901	57015545	85	0.00646195
16	4008901	57016092	85	0.00195133
16	4008901	57016302	85	0.0144779
16	4008901	57016445	85	0.0144779
16	4008901	57016519	85	0.0144779
16	4008901	57016648	85	0.0144779
16	4008901	57017319	85	6.95943e-05
16	4008901	57017474	85	0.0064039
16	4009122	56995236	85	0.00950285
16	4009122	56996158	85	0.00950285
16	4009122	56996211	85	0.00934722
16	4009122	56996288	85	0.00934722
16	4009122	56996649	85	0.00551577
16	4009122	56997233	85	0.00811955
16	4009122	56997369	85	0.00165127
16	4009122	56997551	85	0.000171936
16	4009122	56997656	85	7.45068e-06
16	4009122	56998572	85	0.00709301
16	4009122	56998761	85	0.0443882
16	4009122	56998918	85	0.00713557
16	4009122	56999258	85	0.0126705
16	4009122	56999328	85	0.00940295
16	4009122	56999949	85	1.31857e-05
16	4009122	57000145	85	0.0443882
16	4009122	57000284	85	0.00127407
16	4009122	57000696	85	0.0126705
16	4009122	57000885	85	0.00574671
16	4009122	57000938	85	0.00100709
16	4009122	57001216	85	0.00713557
16	4009122	57001387	85	0.0443882
16	4009122	57001438	85	0.00713557
16	4009122	57001516	85	7.45068e-06
16	4009122	57001794	85	0.00703128
16	4009122	57001985	85	0.000123098
16	4009122	57002404	85	0.000123098
16	4009122	57002663	85	0.0103139
16	4009122	57002732	85	0.00278268
16	4009122	57003025	85	0.0443882
16	4009122	57003146	85	0.00952262
16	4009122	57004889	85	0.00713557
16	4009122	57005301	85	0.00713557
16	4009122	57005479	85	0.00713557
16	4009122	57005620	85	0.034157
16	4009122	57006305	85	0.000123098
16	4009122	57006378	85	0.0103215
16	4009122	57006590	85	0.0103215
16	4009122	57006829	85	0.0082825
16	4009122	57007446	85	0.0222303
16	4009122	57007451	85	0.0249994
16	4009122	57007512	85	0.0537233
16	4009122	57007610	85	0.0513096
16	4009122	57007734	85	0.0398466
16	4009122	57008048	85	0.0398466
16	4009122	57008227	85	0.0130262
16	4009122	57008287	85	0.0130262
16	4009122	57008498	85	0.0395192
16	4009122	57008508	85	0.000333623
16	4009122	57009195	85	0.02922
16	4009122	57009376	85	0.000441823
16	4009122	57009388	85	0.0129473
16	4009122	57009544	85	0.02922
16	4009122	57009769	85	0.0186439
16	4009122	57009917	85	0.023088
16	4009122	57009932	85	0.0160914
16	4009122	57009941	85	0.0111133
16	4009122	57009985	85	0.00343414
16	4009122	57009987	85	0.02922
16	4009122	57010486	85	0.0023801
16	4009122	57010828	85	0.00343414
16	4009122	57010948	85	0.0545903
16	4009122	57011185	85	0.00349593
16	4009122	57011452	85	0.0129473
16	4009122	57011826	85	0.02922
16	4009122	57011936	85	0.0205286
16	4009122	57012379	85	0.00488326
16	4009122	57012563	85	0.000765636
16	4009122	57012699	85	0.0187253
16	4009122	57013016	85	0.02922
16	4009122	57014319	85	0.0111096
16	4009122	57014610	85	3.70445e-05
16	4009122	57014875	85	0.0187253
16	4009122	57015091	85	0.0023801
16	4009122	57015545	85	0.00343414
16	4009122	57016092	85	0.00100274
16	4009122	57016302	85	0.0205286
16	4009122	57016445	85	0.0205286
16	4009122	57016519	85	0.0205286
16	4009122	57016648	85	0.0205286
16	4009122	57017319	85	0.00398802
16	4009122	57017474	85	0.0132609
16	4009764	56995236	85	8.51743e-05
16	4009764	56996158	85	8.51743e-05
16	4009764	56996211	85	3.91296e-06
16	4009764	56996288	85	3.91296e-06
16	4009764	56996649	85	0.00349206
16	4009764	56997233	85	0.00138793
16	4009764	56997369	85	0.00300152
16	4009764	56997551	85	0.000548698
16	4009764	56997656	85	0.000666972
16	4009764	56998572	85	0.00095692
16	4009764	56998761	85	5.65461e-05
16	4009764	56998918	85	0.0069515
16	4009764	56999258	85	0.0125677
16	4009764	56999328	85	0.00841212
16	4009764	56999949	85	0.00118036
16	4009764	57000145	85	5.65461e-05
16	4009764	57000284	85	0.00133997
16	4009764	57000696	85	0.0125677
16	4009764	57000885	85	0.0153359
16	4009764	57000938	85	0.00263826
16	4009764	57001216	85	0.0069515
16	4009764	57001387	85	5.65461e-05
16	4009764	57001438	85	0.0069515
16	4009764	57001516	85	0.000666972
16	4009764	57001794	85	0.00328523
16	4009764	57001985	85	0.00443797
16	4009764	57002404	85	0.00443797
16	4009764	57002663	85	0.0297441
16	4009764	57002732	85	0.0268197
16	4009764	57003025	85	5.65461e-05
16	4009764	57003146	85	0.0118064
16	4009764	57004889	85	0.0069515
16	4009764	57005301	85	0.0069515
16	4009764	57005479	85	0.0069515
16	4009764	57005620	85	1.06588e-07
16	4009764	57006305	85	0.00443797
16	4009764	57006378	85	0.00360925
16	4009764	57006590	85	0.00360925
16	4009764	57006829	85	0.014465
16	4009764	57007446	85	0.0018739
16	4009764	57007451	85	0.00549383
16	4009764	57007512	85	2.24898e-05
16	4009764	57007610	85	0.00352063
16	4009764	57007734	85	0.00464831
16	4009764	57008048	85	0.00464831
16	4009764	57008227	85	0.00447944
16	4009764	57008287	85	0.00447944
16	4009764	57008498	85	0.000618657
16	4009764	57008508	85	0.00425125
16	4009764	57009195	85	0.00212791
16	4009764	57009376	85	0.00560702
16	4009764	57009388	85	0.00817489
16	4009764	57009544	85	0.00212791
16	4009764	57009769	85	0.00269844
16	4009764	57009917	85	0.0191545
16	4009764	57009932	85	0.0020602
16	4009764	57009941	85	0.00293919
16	4009764	57009985	85	0.0206178
16	4009764	57009987	85	0.00212791
16	4009764	57010486	85	0.000486749
16	4009764	57010828	85	0.0206178
16	4009764	57010948	85	0.000424847
16	4009764	57011185	85	0.0106901
16	4009764	57011452	85	0.00817489
16	4009764	57011826	85	0.00212791
16	4009764	57011936	85	0.00141869
16	4009764	57012379	85	0.0307774
16	4009764	57012563	85	0.00349948
16	4009764	57012699	85	0.0201561
16	4009764	57013016	85	0.00212791
16	4009764	57014319	85	0.00304468
16	4009764	57014610	85	0.000941968
16	4009764	57014875	85	0.0201561
16	4009764	57015091	85	0.000486749
16	4009764	57015545	85	0.0206178
16	4009764	57016092	85	0.00212458
16	4009764	57016302	85	0.00141869
16	4009764	57016445	85	0.00141869
16	4009764	57016519	85	0.00141869
16	4009764	57016648	85	0.00141869
16	4009764	57017319	85	0.00419431
16	4009764	57017474	85	0.00013811
16	4009906	56995236	85	0.000616288
16	4009906	56996158	85	0.000616288
16	4009906	56996211	85	2.41063e-06
16	4009906	56996288	85	2.41063e-06
16	4009906	56996649	85	0.000252824
16	4009906	56997233	85	0.000140222
16	4009906	56997369	85	0.000113534
16	4009906	56997551	85	7.63679e-05
16	4009906	56997656	85	0.00284749
16	4009906	56998572	85	0.00109217
16	4009906	56998761	85	0.0132169
16	4009906	56998918	85	0.00610706
16	4009906	56999258	85	0.0202039
16	4009906	56999328	85	0.00754555
16	4009906	56999949	85	5.85661e-06
16	4009906	57000145	85	0.0132169
16	4009906	57000284	85	0.00723556
16	4009906	57000696	85	0.0202039
16	4009906	57000885	85	0.00183475
16	4009906	57000938	85	0.00352192
16	4009906	57001216	85	0.00610706
16	4009906	57001387	85	0.0132169
16	4009906	57001438	85	0.00610706
16	4009906	57001516	85	0.00284749
16	4009906	57001794	85	0.00312305
16	4009906	57001985	85	0.00307552
16	4009906	57002404	85	0.00307552
16	4009906	57002663	85	0.0183242
16	4009906	57002732	85	0.00339047
16	4009906	57003025	85	0.0132169
16	4009906	57003146	85	0.000316395
16	4009906	57004889	85	0.00610706
16	4009906	57005301	85	0.00610706
16	4009906	57005479	85	0.00610706
16	4009906	57005620	85	0.00523432
16	4009906	57006305	85	0.00307552
16	4009906	57006378	85	0.000795915
16	4009906	57006590	85	0.000795915
16	4009906	57006829	85	0.0112099
16	4009906	57007446	85	0.0281119
16	4009906	57007451	85	0.0298321
16	4009906	57007512	85	0.0103513
16	4009906	57007610	85	0.0684257
16	4009906	57007734	85	0.0468234
16	4009906	57008048	85	0.0468234
16	4009906	57008227	85	0.00578576
16	4009906	57008287	85	0.00578576
16	4009906	57008498	85	0.00256901
16	4009906	57008508	85	0.00745992
16	4009906	57009195	85	2.62159e-05
16	4009906	57009376	85	4.73543e-05
16	4009906	57009388	85	0.0286463
16	4009906	57009544	85	2.62159e-05
16	4009906	57009769	85	0.0536553
16	4009906	57009917	85	0.0233506
16	4009906	57009932	85	0.000154775
16	4009906	57009941	85	0.000809482
16	4009906	57009985	85	0.0162769
16	4009906	57009987	85	2.62159e-05
16	4009906	57010486	85	0.02778
16	4009906	57010828	85	0.0162769
16	4009906	57010948	85	0.0242471
16	4009906	57011185	85	0.0139125
16	4009906	57011452	85	0.0286463
16	4009906	57011826	85	2.62159e-05
16	4009906	57011936	85	0.0016192
16	4009906	57012379	85	0.0183685
16	4009906	57012563	85	0.0222202
16	4009906	57012699	85	0.0361601
16	4009906	57013016	85	2.62159e-05
16	4009906	57014319	85	0.00243004
16	4009906	57014610	85	0.00892169
16	4009906	57014875	85	0.0361601
16	4009906	57015091	85	0.02778
16	4009906	57015545	85	0.0162769
16	4009906	57016092	85	0
16	4009906	57016302	85	0.0016192
16	4009906	57016445	85	0.0016192
16	4009906	57016519	85	0.0016192
16	4009906	57016648	85	0.0016192
16	4009906	57017319	85	0.0226484
16	4009906	57017474	85	2.05314e-05
16	4010053	56995236	85	0.0085869
16	4010053	56996158	85	0.0085869
16	4010053	56996211	85	0.00697228
16	4010053	56996288	85	0.00697228
16	4010053	56996649	85	0.0160468
16	4010053	56997233	85	0.012386
16	4010053	56997369	85	0.000326935
16	4010053	56997551	85	0.000559042
16	4010053	56997656	85	0.000292317
16	4010053	56998572	85	0.0102148
16	4010053	56998761	85	0.028397
16	4010053	56998918	85	0.000735118
16	4010053	56999258	85	0.000755573
16	4010053	56999328	85	0.000716962
16	4010053	56999949	85	0.000517322
16	4010053	57000145	85	0.028397
16	4010053	57000284	85	1.4167e-07
16	4010053	57000696	85	0.000755573
16	4010053	57000885	85	0.0335706
16	4010053	57000938	85	0.00662961
16	4010053	57001216	85	0.000735118
16	4010053	57001387	85	0.028397
16	4010053	57001438	85	0.000735118
16	4010053	57001516	85	0.000292317
16	4010053	57001794	85	0.000121899
16	4010053	57001985	85	0.00381597
16	4010053	57002404	85	0.00381597
16	4010053	57002663	85	0.00888123
16	4010053	57002732	85	0.0424098
16	4010053	57003025	85	0.028397
16	4010053	57003146	85	0.0317567
16	4010053	57004889	85	0.000735118
16	4010053	57005301	85	0.000735118
16	4010053	57005479	85	0.000735118
16	4010053	57005620	85	0.020356
16	4010053	57006305	85	0.00381597
16	4010053	57006378	85	0.0195832
16	4010053	57006590	85	0.0195832
16	4010053	57006829	85	0.00255628
16	4010053	57007446	85	0.00417441
16	4010053	57007451	85	0.00168861
16	4010053	57007512	85	0.029808
16	4010053	57007610	85	0.0124948
16	4010053	57007734	85	0.00710838
16	4010053	57008048	85	0.00710838
16	4010053	57008227	85	0.0210841
16	4010053	57008287	85	0.0210841
16	4010053	57008498	85	0.0318813
16	4010053	57008508	85	0.00138593
16	4010053	57009195	85	0.0320837
16	4010053	57009376	85	0.00748053
16	4010053	57009388	85	7.1715e-06
16	4010053	57009544	85	0.0320837
16	4010053	57009769	85	0.0185134
16	4010053	57009917	85	0.0819227
16	4010053	57009932	85	0.00345248
16	4010053	57009941	85	0.00125822
16	4010053	57009985	85	0.00805077
16	4010053	57009987	85	0.0320837
16	4010053	57010486	85	6.95463e-06
16	4010053	57010828	85	0.00805077
16	4010053	57010948	85	0.0231192
16	4010053	57011185	85	0.021344
16	4010053	57011452	85	7.1715e-06
16	4010053	57011826	85	0.0320837
16	4010053	57011936	85	0.0229246
16	4010053	57012379	85	0.0126718
16	4010053	57012563	85	0.0042765
16	4010053	57012699	85	0.000923824
16	4010053	57013016	85	0.0320837
16	4010053	57014319	85	0.0162328
16	4010053	57014610	85	0.00015389
16	4010053	57014875	85	0.000923824
16	4010053	57015091	85	6.95463e-06
16	4010053	57015545	85	0.00805077
16	4010053	57016092	85	0.00437123
16	4010053	57016302	85	0.0229246
16	4010053	57016445	85	0.0229246
16	4010053	57016519	85	0.0229246
16	4010053	57016648	85	0.0229246
16	4010053	57017319	85	0.00076373
16	4010053	57017474	85	0.00690589
16	4011223	56995236	85	0.0209634
16	4011223	56996158	85	0.0209634
16	4011223	56996211	85	0.0155751
16	4011223	56996288	85	0.0155751
16	4011223	56996649	85	0.0120874
16	4011223	56997233	85	0.0125777
16	4011223	56997369	85	0.00619256
16	4011223	56997551	85	0.00579698
16	4011223	56997656	85	0.00159944
16	4011223	56998572	85	0.00693042
16	4011223	56998761	85	0.0636917
16	4011223	56998918	85	0.0128553
16	4011223	56999258	85	0.0222578
16	4011223	56999328	85	0.0149843
16	4011223	56999949	85	0.00776473
16	4011223	57000145	85	0.0636917
16	4011223	57000284	85	0.00205342
16	4011223	57000696	85	0.0222578
16	4011223	57000885	85	0.00575053
16	4011223	57000938	85	0.00484621
16	4011223	57001216	85	0.0128553
16	4011223	57001387	85	0.0636917
16	4011223	57001438	85	0.0128553
16	4011223	57001516	85	0.00159944
16	4011223	57001794	85	0.00523831
16	4011223	57001985	85	0.000130644
16	4011223	57002404	85	0.000130644
16	4011223	57002663	85	0.0194597
16	4011223	57002732	85	0.00373771
16	4011223	57003025	85	0.0636917
16	4011223	57003146	85	0.000956813
16	4011223	57004889	85	0.0128553
16	4011223	57005301	85	0.0128553
16	4011223	57005479	85	0.0128553
16	4011223	57005620	85	0.0676122
16	4011223	57006305	85	0.000130644
16	4011223	57006378	85	0.0086552
16	4011223	57006590	85	0.0086552
16	4011223	57006829	85	0.024934
16	4011223	57007446	85	0.0169721
16	4011223	57007451	85	0.0183695
16	4011223	57007512	85	0.0599537
16	4011223	57007610	85	0.0144073
16	4011223	57007734	85	0.0167309
16	4011223	57008048	85	0.0167309
16	4011223	57008227	85	0.0067044
16	4011223	57008287	85	0.0067044
16	4011223	57008498	85	0.064124
16	4011223	57008508	85	0.0192065
16	4011223	57009195	85	0.068216
16	4011223	57009376	85	0.00133008
16	4011223	57009388	85	0.00431512
16	4011223	57009544	85	0.068216
16	4011223	57009769	85	0.00465143
16	4011223	57009917	85	0.00159944
16	4011223	57009932	85	0.0356497
16	4011223	57009941	85	0.0406617
16	4011223	57009985	85	6.47937e-05
16	4011223	57009987	85	0.068216
16	4011223	57010486	85	0.00484621
16	4011223	57010828	85	6.47937e-05
16	4011223	57010948	85	0.0318723
16	4011223	57011185	85	0.0283675
16	4011223	57011452	85	0.00431512
16	4011223	57011826	85	0.068216
16	4011223	57011936	85	0.0724732
16	4011223	57012379	85	0.000227982
16	4011223	57012563	85	0.0185486
16	4011223	57012699	85	0.00639746
16	4011223	57013016	85	0.068216
16	4011223	57014319	85	0.00931603
16	4011223	57014610	85	0.0171029
16	4011223	57014875	85	0.00639746
16	4011223	57015091	85	0.00484621
16	4011223	57015545	85	6.47937e-05
16	4011223	57016092	85	0.00189192
16	4011223	57016302	85	0.0724732
16	4011223	57016445	85	0.0724732
16	4011223	57016519	85	0.0724732
16	4011223	57016648	85	0.0724732
16	4011223	57017319	85	0.000994963
16	4011223	57017474	85	0.032951
16	4012480	56995236	85	0.000238119
16	4012480	56996158	85	0.000238119
16	4012480	56996211	85	0.00140772
16	4012480	56996288	85	0.00140772
16	4012480	56996649	85	0.00146647
16	4012480	56997233	85	0.000625783
16	4012480	56997369	85	0.000156001
16	4012480	56997551	85	0.00279482
16	4012480	56997656	85	0.0152157
16	4012480	56998572	85	0.000465215
16	4012480	56998761	85	0.0263403
16	4012480	56998918	85	0.0239174
16	4012480	56999258	85	0.0048692
16	4012480	56999328	85	0.0179315
16	4012480	56999949	85	0.00278865
16	4012480	57000145	85	0.0263403
16	4012480	57000284	85	0.00776862
16	4012480	57000696	85	0.0048692
16	4012480	57000885	85	0.00578477
16	4012480	57000938	85	6.17161e-05
16	4012480	57001216	85	0.0171635
16	4012480	57001387	85	0.0263403
16	4012480	57001438	85	0.0171635
16	4012480	57001516	85	0.0152157
16	4012480	57001794	85	0.00786055
16	4012480	57001985	85	0.0148872
16	4012480	57002404	85	0.0148872
16	4012480	57002663	85	0.000595939
16	4012480	57002732	85	0.0100306
16	4012480	57003025	85	0.0263403
16	4012480	57003146	85	0.0365816
16	4012480	57004889	85	0.0171635
16	4012480	57005301	85	0.0171635
16	4012480	57005479	85	0.0171635
16	4012480	57005620	85	0.0182836
16	4012480	57006305	85	0.0148872
16	4012480	57006378	85	0.00629929
16	4012480	57006590	85	0.00629929
16	4012480	57006829	85	0.00217443
16	4012480	57007446	85	0.0140497
16	4012480	57007451	85	0.013794
16	4012480	57007512	85	0.0381569
16	4012480	57007610	85	5.46543e-05
16	4012480	57007734	85	0.00048085
16	4012480	57008048	85	0.00048085
16	4012480	57008227	85	0.00399038
16	4012480	57008287	85	0.00399038
16	4012480	57008498	85	0.040811
16	4012480	57008508	85	0.00654666
16	4012480	57009195	85	0.0408912
16	4012480	57009376	85	0.00199591
16	4012480	57009388	85	0.0029492
16	4012480	57009544	85	0.0408912
16	4012480	57009769	85	0.000320505
16	4012480	57009917	85	0.0844858
16	4012480	57009932	85	0.016198
16	4012480	57009941	85	0.0109426
16	4012480	57009985	85	0.00738343
16	4012480	57009987	85	0.0408912
16	4012480	57010486	85	0.00252103
16	4012480	57010828	85	0.00738343
16	4012480	57010948	85	0.0185043
16	4012480	57011185	85	0.042568
16	4012480	57011452	85	0.0029492
16	4012480	57011826	85	0.0408912
16	4012480	57011936	85	0.0299719
16	4012480	57012379	85	0.0120658
16	4012480	57012563	85	0.000467272
16	4012480	57012699	85	0.00853417
16	4012480	57013016	85	0.0408912
16	4012480	57014319	85	0.00182084
16	4012480	57014610	85	0.0114288
16	4012480	57014875	85	0.00853417
16	4012480	57015091	85	0.00252103
16	4012480	57015545	85	0.00738343
16	4012480	57016092	85	0.000521447
16	4012480	57016302	85	0.0299719
16	4012480	57016445	85	0.0299719
16	4012480	57016519	85	0.0299719
16	4012480	57016648	85	0.0299719
16	4012480	57017319	85	0.000400395
16	4012480	57017474	85	0.0233807
16	4013144	56995236	85	0.00970634
16	4013144	56996158	85	0.00970634
16	4013144	56996211	85	0.00631497
16	4013144	56996288	85	0.00631497
16	4013144	56996649	85	0.00422685
16	4013144	56997233	85	0.00393854
16	4013144	56997369	85	0.00619256
16	4013144	56997551	85	4.28959e-05
16	4013144	56997656	85	0.00159944
16	4013144	56998572	85	0.00693042
16	4013144	56998761	85	0.0217486
16	4013144	56998918	85	0.00467127
16	4013144	56999258	85	0.00324486
16	4013144	56999328	85	0.00586356
16	4013144	56999949	85	0.000304757
16	4013144	57000145	85	0.0217486
16	4013144	57000284	85	0.000317864
16	4013144	57000696	85	0.00324486
16	4013144	57000885	85	0.00575053
16	4013144	57000938	85	0.00484621
16	4013144	57001216	85	0.00467127
16	4013144	57001387	85	0.0217486
16	4013144	57001438	85	0.00467127
16	4013144	57001516	85	0.00159944
16	4013144	57001794	85	0.00523831
16	4013144	57001985	85	0.00284513
16	4013144	57002404	85	0.00284513
16	4013144	57002663	85	0.00216219
16	4013144	57002732	85	0.00373771
16	4013144	57003025	85	0.0217486
16	4013144	57003146	85	0.000956813
16	4013144	57004889	85	0.00467127
16	4013144	57005301	85	0.00467127
16	4013144	57005479	85	0.00467127
16	4013144	57005620	85	0.0241102
16	4013144	57006305	85	0.00284513
16	4013144	57006378	85	0.0086552
16	4013144	57006590	85	0.0086552
16	4013144	57006829	85	0.00418573
16	4013144	57007446	85	0.00132739
16	4013144	57007451	85	0.00184907
16	4013144	57007512	85	0.0185429
16	4013144	57007610	85	0.00397314
16	4013144	57007734	85	0.00519619
16	4013144	57008048	85	0.00519619
16	4013144	57008227	85	0.0067044
16	4013144	57008287	85	0.0067044
16	4013144	57008498	85	0.03882
16	4013144	57008508	85	0.00771093
16	4013144	57009195	85	0.0420743
16	4013144	57009376	85	0.00133008
16	4013144	57009388	85	2.28042e-06
16	4013144	57009544	85	0.0420743
16	4013144	57009769	85	1.81697e-05
16	4013144	57009917	85	0.00159944
16	4013144	57009932	85	0.0193982
16	4013144	57009941	85	0.0227366
16	4013144	57009985	85	0.00141106
16	4013144	57009987	85	0.0420743
16	4013144	57010486	85	0.015604
16	4013144	57010828	85	0.00141106
16	4013144	57010948	85	0.0318723
16	4013144	57011185	85	0.0283675
16	4013144	57011452	85	2.28042e-06
16	4013144	57011826	85	0.0420743
16	4013144	57011936	85	0.0454801
16	4013144	57012379	85	0.000944789
16	4013144	57012563	85	0.00474562
16	4013144	57012699	85	0.000143943
16	4013144	57013016	85	0.0420743
16	4013144	57014319	85	0.00931603
16	4013144	57014610	85	0.00640312
16	4013144	57014875	85	0.000143943
16	4013144	57015091	85	0.015604
16	4013144	57015545	85	0.00141106
16	4013144	57016092	85	0.00189192
16	4013144	57016302	85	0.0454801
16	4013144	57016445	85	0.0454801
16	4013144	57016519	85	0.0454801
16	4013144	57016648	85	0.0454801
16	4013144	57017319	85	0.00763885
16	4013144	57017474	85	0.0174006
16	4013467	56995236	85	0.000308552
16	4013467	56996158	85	0.000308552
16	4013467	56996211	85	0.00286721
16	4013467	56996288	85	0.00286721
16	4013467	56996649	85	0.000129316
16	4013467	56997233	85	0.000277851
16	4013467	56997369	85	0.00107651
16	4013467	56997551	85	0.00124092
16	4013467	56997656	85	0.0274926
16	4013467	56998572	85	0.000375718
16	4013467	56998761	85	0.000239871
16	4013467	56998918	85	1.44364e-05
16	4013467	56999258	85	0.00835907
16	4013467	56999328	85	0.000239282
16	4013467	56999949	85	0.00470018
16	4013467	57000145	85	0.000239871
16	4013467	57000284	85	0.0309066
16	4013467	57000696	85	0.00835907
16	4013467	57000885	85	0.0120069
16	4013467	57000938	85	0.00176329
16	4013467	57001216	85	0.00130289
16	4013467	57001387	85	0.000239871
16	4013467	57001438	85	0.00130289
16	4013467	57001516	85	0.0274926
16	4013467	57001794	85	0.00654886
16	4013467	57001985	85	0.0172002
16	4013467	57002404	85	0.0172002
16	4013467	57002663	85	0.00444793
16	4013467	57002732	85	0.0143419
16	4013467	57003025	85	0.000239871
16	4013467	57003146	85	0.00609188
16	4013467	57004889	85	0.00130289
16	4013467	57005301	85	0.00130289
16	4013467	57005479	85	0.00130289
16	4013467	57005620	85	0.000824957
16	4013467	57006305	85	0.0172002
16	4013467	57006378	85	0.00445124
16	4013467	57006590	85	0.00445124
16	4013467	57006829	85	0.00649709
16	4013467	57007446	85	0.000767914
16	4013467	57007451	85	0.0023808
16	4013467	57007512	85	0.000756703
16	4013467	57007610	85	0.0308083
16	4013467	57007734	85	0.0261946
16	4013467	57008048	85	0.0261946
16	4013467	57008227	85	0.00216652
16	4013467	57008287	85	0.00216652
16	4013467	57008498	85	0.000809338
16	4013467	57008508	85	0.000293628
16	4013467	57009195	85	0.00181211
16	4013467	57009376	85	0.0066801
16	4013467	57009388	85	0.021374
16	4013467	57009544	85	0.00181211
16	4013467	57009769	85	0.00239217
16	4013467	57009917	85	0.0080329
16	4013467	57009932	85	0.00318301
16	4013467	57009941	85	0.00203006
16	4013467	57009985	85	0.0362882
16	4013467	57009987	85	0.00181211
16	4013467	57010486	85	0.00176329
16	4013467	57010828	85	0.0362882
16	4013467	57010948	85	0.00849365
16	4013467	57011185	85	0.0198022
16	4013467	57011452	85	0.021374
16	4013467	57011826	85	0.00181211
16	4013467	57011936	85	0.00320847
16	4013467	57012379	85	0.0323367
16	4013467	57012563	85	7.25507e-05
16	4013467	57012699	85	0.0189511
16	4013467	57013016	85	0.00181211
16	4013467	57014319	85	0.0047911
16	4013467	57014610	85	0.000898634
16	4013467	57014875	85	0.0189511
16	4013467	57015091	85	0.00176329
16	4013467	57015545	85	0.0362882
16	4013467	57016092	85	0.00875687
16	4013467	57016302	85	0.00320847
16	4013467	57016445	85	0.00320847
16	4013467	57016519	85	0.00320847
16	4013467	57016648	85	0.00320847
16	4013467	57017319	85	0.00499702
16	4013467	57017474	85	0.00477002
16	4014141	56995236	85	0.00422083
16	4014141	56996158	85	0.00422083
16	4014141	56996211	85	0.00180101
16	4014141	56996288	85	0.00180101
16	4014141	56996649	85	0.000767155
16	4014141	56997233	85	0.00130238
16	4014141	56997369	85	0.00420154
16	4014141	56997551	85	7.63679e-05
16	4014141	56997656	85	0.00247244
16	4014141	56998572	85	0.00315047
16	4014141	56998761	85	0.00410481
16	4014141	56998918	85	0.00118657
16	4014141	56999258	85	6.23576e-05
16	4014141	56999328	85	0.00179657
16	4014141	56999949	85	5.85661e-06
16	4014141	57000145	85	0.00410481
16	4014141	57000284	85	0.00140512
16	4014141	57000696	85	6.23576e-05
16	4014141	57000885	85	0.00255249
16	4014141	57000938	85	0.00230224
16	4014141	57001216	85	0.00118657
16	4014141	57001387	85	0.00410481
16	4014141	57001438	85	0.00118657
16	4014141	57001516	85	0.00247244
16	4014141	57001794	85	0.00312305
16	4014141	57001985	85	0.0049345
16	4014141	57002404	85	0.0049345
16	4014141	57002663	85	0
16	4014141	57002732	85	0.00123597
16	4014141	57003025	85	0.00410481
16	4014141	57003146	85	0.000316395
[truncated: 35,803 more rows]
