# Supplementary material for: A sex-specific evolutionary interaction between ADCY9 and CETP
Source: eLife journal article supplement (doi:10.7554/elife.69198), 2021-10-05
Supplement: supp [file elife-69198-supp-v1.zip › elife_poa_e69198_Figure_3_source_data_2.txt]

SNP	GG	AG	AA
	NaN	NaN	NaN
YRI (108)	0.296296296296296	0.5	0.203703703703704
LWK (99)	0.535353535353535	0.393939393939394	0.0707070707070707
GWD (113)	0.442477876106195	0.442477876106195	0.115044247787611
MSL (85)	0.352941176470588	0.458823529411765	0.188235294117647
ESN (99)	0.353535353535354	0.343434343434343	0.303030303030303
ASW (61)	0.409836065573771	0.475409836065574	0.114754098360656
ACB (96)	0.375	0.40625	0.21875
	NaN	NaN	NaN
CEU (99)	0.202020202020202	0.525252525252525	0.272727272727273
TSI (107)	0.205607476635514	0.551401869158878	0.242990654205607
FIN (99)	0.232323232323232	0.515151515151515	0.252525252525253
GBR (91)	0.274725274725275	0.406593406593407	0.318681318681319
IBS (107)	0.177570093457944	0.523364485981308	0.299065420560748
	NaN	NaN	NaN
CHB (103)	0.233009708737864	0.504854368932039	0.262135922330097
JPT (104)	0.25	0.5	0.25
CHS (105)	0.247619047619048	0.504761904761905	0.247619047619048
CDX (93)	0.182795698924731	0.473118279569892	0.344086021505376
KHV (99)	0.202020202020202	0.434343434343434	0.363636363636364
	NaN	NaN	NaN
GIH (103)	0.339805825242718	0.514563106796116	0.145631067961165
PJL (96)	0.260416666666667	0.520833333333333	0.21875
BEB (86)	0.27906976744186	0.5	0.22093023255814
STU (102)	0.294117647058824	0.509803921568627	0.196078431372549
ITU (102)	0.333333333333333	0.509803921568627	0.156862745098039
	NaN	NaN	NaN
MXL (64)	0.328125	0.53125	0.140625
PUR (104)	0.278846153846154	0.451923076923077	0.269230769230769
CLM (94)	0.180851063829787	0.585106382978723	0.234042553191489
PEL (85)	0.670588235294118	0.282352941176471	0.0470588235294118
	NaN	NaN	NaN
ALT (104)	0.230769230769231	0.451923076923077	0.317307692307692
URY (55)	0.2	0.563636363636364	0.236363636363636
CHK (40)	0.4	0.4	0.2
NOA (81)	0.617283950617284	0.358024691358025	0.0246913580246914
CEA (81)	0.679012345679012	0.246913580246914	0.0740740740740741
CHP (61)	0.688524590163934	0.278688524590164	0.0327868852459016
EQT (83)	0.481927710843373	0.457831325301205	0.0602409638554217
AND (88)	0.568181818181818	0.329545454545455	0.102272727272727
