# Supplementary material for: A sex-specific evolutionary interaction between ADCY9 and CETP
Source: eLife journal article supplement (doi:10.7554/elife.69198), 2021-10-05
Supplement: supp [file elife-69198-supp-v1.zip › elife_poa_e69198_Figure_3_source_data_3.txt]

CHR	POS1	POS2	N_INDV	R^2
1	853488	51617981	85	0.0105175
1	1844046	51989591	85	0.0047425
1	2269899	52357477	85	0.00844844
1	2372397	52785160	85	0.0227167
1	2859724	53043216	85	0.0238323
1	3320600	53513437	85	6.77038e-05
1	3681063	53757154	85	0.0176472
1	4520285	54600710	85	0.0418006
1	5310609	55325794	85	0.00101121
1	6104064	56216366	85	0.00932461
1	6222075	56438651	85	0.0294372
1	7056538	57079723	85	0.0352399
1	7170279	57183041	85	5.77599e-05
1	7612284	57651129	85	2.56753e-05
1	8193294	58199778	85	0.000307466
1	8540341	58637639	85	0.0143855
1	8642588	58805969	85	0.00639989
1	9069412	59151273	85	0.00631284
1	9173946	59253616	85	0.000277996
1	9725525	59794792	85	0.000537364
1	9825543	59894984	85	0.00326289
1	10484170	60543919	85	0.0933752
1	10593296	60777241	85	0.0223781
1	10957984	61045537	85	0.0122354
1	11710561	61778594	85	0.0177286
1	12503253	62579437	85	0.0433832
1	12639389	62680934	85	0.0114992
1	13787178	63885222	85	0.0129067
1	13889947	63986435	85	0.00107961
1	13992029	64086901	85	0.0669736
1	14099763	64294382	85	0.000122316
1	14305454	64395793	85	0.00245181
1	14406741	64539778	85	0.000812577
1	14690876	64771386	85	0.0792933
1	14810262	64933324	85	0.00346624
1	14957757	65041861	85	0.00592523
1	15057902	65305522	85	0.0274
1	15421785	65477023	85	0.00239403
1	15548636	65584570	85	0.00793121
1	15687059	65698179	85	0.0057629
1	15787695	65843653	85	0.00278779
1	15946667	65992625	85	0.0170885
1	16095316	66130398	85	0.000164245
1	16196759	66281594	85	0.00475259
1	16297592	66385385	85	0.00187345
1	16505320	66558828	85	0.0024902
1	16624078	66697008	85	0.0221633
1	17480534	67570879	85	0.00287162
1	17600469	67673112	85	0.0334663
1	17708766	67773351	85	0.0106528
1	17858638	67928351	85	0.0174068
1	17979118	68065765	85	0.000101945
1	18094782	68267243	85	0.00714377
1	18313386	68404922	85	0.037313
1	18437923	68552723	85	0.0826447
1	18553047	68655629	85	2.64437e-05
1	18755426	68804187	85	0.000892588
1	18856937	68910612	85	0.00295257
1	18965419	69019502	85	0.00412427
1	19092477	69459883	85	0.000325913
1	19486136	69644108	85	0.0108906
1	19726179	69745743	85	0.00742164
1	19831227	69915596	85	0.00206212
1	19974794	70056482	85	0.00423105
1	20081775	70158638	85	0.00154836
1	20208825	70279152	85	0.00402673
1	20389874	70414376	85	0.00165869
1	20490518	70682550	85	0.0109836
1	20697591	70950225	85	2.3466e-07
1	20962265	71085350	85	0.000559452
1	21178467	71186509	85	0.0111851
1	21283192	71335507	85	0.0129232
1	21538708	71753041	85	0.000941599
1	21795824	72014193	85	3.92194e-05
1	21999320	72418327	85	0.0153438
1	22210044	73010063	85	0.00264954
1	22412645	73274336	85	0.00642112
1	22536899	74327078	85	0.000917072
1	22638050	74432276	85	0.0072429
1	22774266	75041188	85	0.00967199
1	22885573	75165182	85	0.0070524
1	22989745	75421446	85	0.012334
1	23099603	76153140	85	0.00921937
1	23208925	76771114	85	0.00701155
1	23970130	76887354	85	0.0227389
1	24071048	77000099	85	0.0166212
1	24527095	77263563	85	0.000432657
1	24741819	77480668	85	0.00076344
1	25030470	77705820	85	0.00855302
1	25273200	78350272	85	0.000655694
1	25374586	79169632	85	0.0339026
1	25499030	79309432	85	0.0286441
1	25939898	79582607	85	0.0047679
1	26123405	80138826	85	0.00158847
1	26324108	80788599	85	0.0053174
1	26577519	81113456	85	0.00827181
1	26686155	81221524	85	0.0117578
1	26786627	81354844	85	0.0183251
1	26909666	81462331	85	0.0130648
1	27397604	81661538	85	0.00634958
1	27679692	81797048	85	0.0129085
1	27969373	82008382	85	1.26801e-05
1	28073890	82181804	85	0.000637185
1	28510330	82714297	85	0.0271762
1	28682363	82830344	85	0.00189347
1	29181525	82937433	85	0.0024232
1	29813268	83257232	85	0.00108349
1	30256927	83888878	85	0.0147069
1	30476220	84677747	85	0.0191092
1	30578618	84778870	85	0.00472825
1	30991783	85230072	85	0.000996086
1	31118731	85441702	85	0.00165967
1	31230126	85787334	85	0.0152309
1	31354813	86030595	85	5.47589e-05
1	31676260	86131623	85	0.00043127
1	31898687	86478043	85	0.0115392
1	32266026	86578951	85	2.74177e-05
1	32498973	86822809	85	0.0254704
1	32887031	86961157	85	0.000450275
1	33231747	87276009	85	0.000109938
1	33332898	87587849	85	0.00123289
1	34022746	87690412	85	0.00539656
1	34186193	88043045	85	0.0161408
1	34413398	88184653	85	0.0106271
1	34595736	88384279	85	3.41866e-05
1	34697488	88484600	85	0.0172252
1	34939967	88604157	85	0.000627392
1	35042445	88790151	85	0.00825201
1	35332344	89821568	85	0.000188388
1	35573192	90304187	85	0.0339074
1	35784082	90532766	85	0.00605528
1	37099166	91100934	85	0.035606
1	37435147	92086023	85	0.00046911
1	37537293	92186241	85	0.000825419
1	37642158	92558583	85	0.00113242
1	37742158	93590668	85	0.00034079
1	37864911	94175632	85	0.0036751
1	38522092	94523113	85	0.0100531
1	39014741	95443129	85	0.000642512
1	39123603	95776788	85	0.066898
1	39230383	96044847	85	0.0117661
1	39340002	96282716	85	0.0374769
1	39465139	96675640	85	0.0247178
1	39569571	97114099	85	0.00745114
1	40096403	97491891	85	0.000472101
1	40203722	97797970	85	0.00174545
1	40719239	98309251	85	0.0140839
1	40822421	98728204	85	0.00577172
1	41148375	98854284	85	0.0116378
1	41433484	99538754	85	0.00503986
1	41842350	99713251	85	0.0106275
1	41953186	99835304	85	0.00172328
1	42053497	100081772	85	3.91035e-05
1	42230109	100198059	85	0.000192558
1	42842954	100568759	85	0.0202407
1	42944070	100818728	85	0.0345403
1	43367875	101199886	85	0.000754025
1	43688320	101563652	85	0.000768469
1	43840065	101669840	85	0.000122508
1	44466606	101849423	85	0.0130394
1	44965376	102253122	85	0.00060694
1	45078152	102388810	85	0.00751178
1	45806768	102498225	85	0.00128658
1	46905802	103423549	85	0.0107827
1	47208081	104491209	85	0.0213781
1	47308949	104754536	85	0.000723387
1	47606035	104985719	85	0.00696824
1	47733302	105180373	85	0.00914109
1	48056629	105554830	85	0.0119304
1	48196251	106268390	85	0.00410585
1	48319278	106948268	85	0.00450869
1	48551084	107660600	85	0.0140799
1	49196060	107842303	85	0.0856554
1	56764863	111250619	85	0.0100409
1	56869617	111429549	85	6.24912e-05
1	56977819	111812241	85	0.00996153
1	57333304	112032347	85	0.00717421
1	58906133	113746280	85	0.0185857
1	60441268	116014319	85	0.000204146
1	61914112	117715026	85	0.00578868
1	62025285	117935581	85	0.00649187
1	62787819	119908763	85	0.000270431
1	63083289	120266903	85	0.00521312
1	63245712	120379245	85	0.000279377
1	144894611	203271930	85	0.00855635
1	147096794	203394194	85	0.0232556
1	147735751	203519648	85	0.000108929
1	150236472	203636660	85	0.00554018
1	151103153	203738781	85	0.0420023
1	151544496	203982102	85	0.00822492
1	151789647	204112984	85	0.000113607
1	152159773	204213404	85	0.000527882
1	152681603	204344041	85	0.000127296
1	153007176	204456983	85	0.0725888
1	153265654	204697708	85	0.0495338
1	153401588	205015920	85	0.00508417
1	153509890	205316663	85	0.0295833
1	153610017	205417231	85	0.0023386
1	153773429	205528634	85	0.0188212
1	154750638	206714520	85	0.000119809
1	154975451	206957558	85	0.00687155
1	156147558	207643949	85	0.000123793
1	156351699	207782707	85	0.000620971
1	156551848	207988603	85	0.00173283
1	156655806	208106361	85	0.00507241
1	156762493	208207839	85	0.00282845
1	156867984	208324910	85	0.022355
1	156969058	208456922	85	0.0407219
1	157258242	208566805	85	2.02777e-05
1	157359491	208700789	85	0.0340365
1	157766473	208808979	85	4.57343e-05
1	157870359	208958679	85	0.00324283
1	158377027	209608020	85	0.0658007
1	158653809	209717109	85	0.000824662
1	158870304	209833313	85	0.0156551
1	159148513	210813563	85	0.0380636
1	159703830	211403202	85	0.0127238
1	159852822	211946031	85	0.0064142
1	159958028	212841934	85	0.00300206
1	160059748	212943719	85	0.00848144
1	160407025	213666584	85	0.0546364
1	160583233	213902990	85	0.0443173
1	160686494	214486472	85	0.00490398
1	160786670	214591444	85	0.00399584
1	161240901	214735146	85	4.50747e-05
1	161403309	215132091	85	0.0171336
1	161975281	215380352	85	0.00495347
1	162133117	215930673	85	0.00366605
1	162338581	216164383	85	0.0236785
1	162469589	216264388	85	0.000410443
1	163032842	216688934	85	0.0485042
1	163402694	216920820	85	0.014939
1	163505727	217026271	85	0.00233309
1	163616878	217153705	85	0.00263059
1	163837024	217254210	85	0.00240024
1	164470631	217366615	85	0.00262945
1	164604957	218079236	85	0.00102314
1	164723835	218622319	85	0.00186091
1	164904740	218741263	85	0.0403555
1	165020544	218841966	85	0.000257081
1	165124178	219066566	85	0.0203836
1	165269274	219377242	85	0.0329846
1	165375623	219636541	85	0.00344405
1	165531667	219841296	85	0.00596966
1	165652612	220047302	85	0.00639764
1	165781564	220155157	85	0.000654918
1	166068834	220481113	85	0.026531
1	166332755	220589093	85	0.00158498
1	166454163	220865733	85	0.0218562
1	167033392	221617076	85	0.0455444
1	167153763	221891343	85	0.0217179
1	167397078	222148219	85	0.00355038
1	167520464	222982059	85	0.0124638
1	167632082	223523487	85	0.00203044
1	167772520	223648733	85	0.00459616
1	168237971	224040177	85	5.18456e-05
1	168366247	224901593	85	0.00158772
1	168482904	225702610	85	0.0274052
1	168618641	226015359	85	0.00152252
1	168720621	226220281	85	0.0221109
1	168983882	226667520	85	0.000710548
1	169101935	226891213	85	4.40749e-06
1	169648341	228551090	85	0.00188499
1	169748342	228693437	85	0.00022417
1	170147431	228807528	85	0.00313132
1	170285457	229027337	85	0.00918977
1	170623109	229127347	85	0.0298926
1	171071883	229227923	85	0.000756707
1	171301033	229372113	85	8.97569e-05
1	171484556	229619516	85	0.0299434
1	171741801	229955925	85	0.00358316
1	171939290	230206963	85	0.00576798
1	172386690	230327766	85	0.00365772
1	172791966	230436615	85	0.0492507
1	173093402	230595008	85	0.0079343
1	173305632	230910665	85	0.0181404
1	175043955	231011558	85	0.00732279
1	175290709	231316174	85	0.00084653
1	175394444	231833422	85	0.00624321
1	175520789	232010156	85	0.0920762
1	175627115	232137376	85	0.00138309
1	175833534	232402313	85	0.0301652
1	176513537	232535659	85	0.0083467
1	176801127	232756566	85	0.000546179
1	177144156	232857354	85	0.000860763
1	177651729	232958911	85	4.63124e-06
1	177764975	233070803	85	0.0123079
1	177868990	233196709	85	0.000252903
1	178178126	233303670	85	0.00299691
1	178967917	233622353	85	0.000215689
1	179736275	233753991	85	0.0241247
1	180234729	234060361	85	0.00122322
1	180893525	234218181	85	0.0106464
1	181120284	234427616	85	0.00911386
1	181231421	234529519	85	5.62514e-05
1	181394765	234645694	85	0.0209333
1	181555324	234747692	85	0.00266214
1	181888775	234870143	85	0.00790339
1	182305460	235027250	85	0.000706072
1	182759387	235129240	85	0.00239457
1	183272486	235248412	85	0.00282333
1	184963878	235852066	85	0.00628629
1	185542381	236132277	85	0.0406968
1	185911608	236275465	85	0.000273424
1	186243275	236380611	85	3.94458e-07
1	186566935	236616314	85	0.00154315
1	186667126	236716686	85	0.00153629
1	186783125	236819215	85	0.0118434
1	186887066	237003867	85	0.0145311
1	187038001	237132111	85	0.00071194
1	187416010	237455023	85	0.00260895
1	187543154	237572282	85	0.00926159
1	187724115	237724344	85	6.32553e-05
1	187840501	238023033	85	0.00374054
1	188027638	238176271	85	0.000916057
1	188176607	238341763	85	0.011506
1	188620397	238679943	85	0.000652765
1	188730650	238855478	85	0.0330986
1	188857177	239032602	85	0.0124088
1	189152141	239255387	85	0.0162959
1	189589199	239703278	85	0.00795402
1	189755353	239808491	85	0.0248781
1	190117274	240171342	85	0.00205356
1	190385304	240446096	85	1.06636e-05
1	190522976	240570975	85	0.0127472
1	190822055	240901508	85	0.00155776
1	190925112	241178287	85	0.0219879
1	191423279	241525522	85	0.00625828
1	191540201	241656126	85	0.00137376
1	191880317	242009307	85	0.0026704
1	192096142	242115069	85	0.000316297
1	192206094	242225402	85	0.025974
1	192352813	242465655	85	0.0400222
1	192548045	242568859	85	0.0124126
1	192691331	242797099	85	0.0230977
1	192802297	242936466	85	0.0592954
1	193149754	243332978	85	0.0134817
1	193443157	243550647	85	0.0242248
1	193644862	243662087	85	0.0110855
1	193802260	243914611	85	0.0587708
1	194044964	244131275	85	0.000111001
1	194519923	244723481	85	0.00606292
1	194943773	245063661	85	9.93388e-05
1	195159312	245242368	85	0.00256398
1	195633355	245676418	85	0.00975804
1	195852964	245907744	85	0.012504
1	195954813	246007828	85	0.040648
1	196504508	246606143	85	2.01654e-05
1	196675861	246740653	85	0.00039634
1	197021189	247056407	85	0.0151422
1	197126649	247223881	85	0.0102209
1	197337830	247513049	85	4.68139e-05
1	197843204	247929426	85	0.0199749
1	197947090	248038442	85	0.00135555
1	198061466	248357891	85	0.0223373
1	198369280	248457979	85	0.00168062
1	198991093	249074032	85	0.0327773
1	199139429	249174650	85	0.0210722
2	2485202	52590319	85	0.00620724
2	2604810	52703590	85	0.024008
2	2706913	52837374	85	0.00770658
2	2909427	52939932	85	0.0328849
2	3058026	53133224	85	0.0155482
2	3158471	53361063	85	0.030319
2	3392295	53492139	85	0.029505
2	3492318	53609363	85	0.000296168
2	3633220	53736892	85	0.000752203
2	3756073	53838078	85	0.00335212
2	3857648	53939427	85	0.0516189
2	3963166	54039813	85	0.0869765
2	4063372	54140575	85	0.0287374
2	4186085	54362975	85	0.0482592
2	4409380	54466390	85	0.00482418
2	4597188	54675635	85	0.00576203
2	4703835	54776127	85	0.00471425
2	4810329	54881621	85	0.035889
2	4964465	54986151	85	0.0205433
2	5474827	55507333	85	0.0481549
2	5582906	55607452	85	0.00750686
2	5689487	55732476	85	0.0506463
2	5813397	55836366	85	0.00663832
2	5930862	55958891	85	0.0497973
2	6056483	56080379	85	0.0362095
2	6193597	56284207	85	0.0090917
2	6373693	56386032	85	0.00388905
2	6694519	56777474	85	0.00290777
2	6795714	56877983	85	0.00334357
2	6896086	56986399	85	0.0110937
2	7003396	57088328	85	0.0553936
2	7104044	57242194	85	0.0605282
2	7305774	57832074	85	0.0326022
2	7849665	57933838	85	0.00613132
2	7949693	58035088	85	0.0292115
2	8051826	58234130	85	0.0298875
2	8283189	58373205	85	0.000486347
2	8391187	58488026	85	0.000724712
2	8498478	58650355	85	0.00739707
2	8764261	58802507	85	0.00391967
2	8871342	58903030	85	0.0633982
2	9165288	59266349	85	0.0203804
2	9267071	59453348	85	0.0236287
2	9556530	59607787	85	0.0061641
2	9661184	59709265	85	0.0364849
2	9763645	59813493	85	0.0368086
2	9872256	59953475	85	0.00291484
2	9982284	60090865	85	0.00208599
2	10213497	60338227	85	0.00677848
2	10430597	60456933	85	0.00930025
2	10535607	60566131	85	0.0235272
2	10665979	60689441	85	0.000198677
2	10801420	60813347	85	3.61754e-06
2	10901790	61020553	85	0.0599608
2	11103159	61154325	85	0.00131147
2	11335847	61357777	85	0.0122923
2	11537452	61558682	85	0.00035324
2	11641853	61660483	85	0.0452199
2	11772610	61780230	85	0.0144397
2	11879105	61881190	85	0.0178535
2	11979525	61989536	85	0.00078127
2	12094145	62274840	85	0.00447838
2	12320694	62529925	85	0.000862432
2	12610405	62637252	85	0.00664582
2	12710652	62738111	85	0.000439995
2	12818733	63131731	85	0.0073652
2	13171191	63475724	85	0.00464315
2	13517456	63589591	85	0.00215347
2	13679828	63693621	85	0.00163435
2	13843418	63943616	85	0.0983014
2	13961735	64069732	85	0.000152489
2	14082017	64173754	85	0.00137004
2	14207915	64324076	85	0.0448333
2	14345791	64438890	85	0.00249128
2	14448455	64569840	85	0.00888288
2	14595204	64690627	85	0.0286498
2	14734640	64806928	85	0.0262007
2	15008865	65069310	85	0.0453694
2	15122280	65206924	85	0.00190564
2	15223775	65307361	85	8.87012e-05
2	15324864	65608363	85	0.0161161
2	15724122	65895439	85	0.00357569
2	15930951	66066014	85	0.000697093
2	16195030	66246665	85	0.0024499
2	16336651	66349602	85	0.0120389
2	16457827	66460244	85	0.000920323
2	16579208	66588804	85	0.00148769
2	16789322	66816582	85	0.00422705
2	16945636	67050752	85	0.00397488
2	17156703	67173418	85	0.0228283
2	17259708	67285662	85	2.13576e-05
2	17362690	67387186	85	0.000395104
2	17474445	67520575	85	0.0227433
2	17655480	67724128	85	0.0434743
2	17756383	67870799	85	0.000496741
2	17882649	67992654	85	0.0313487
2	17997242	68118436	85	0.00141246
2	18180664	68223094	85	0.0263281
2	18334896	68339733	85	0.00362205
2	18478509	68546449	85	0.0188593
2	18621953	68646771	85	0.0274159
2	18744117	68747376	85	3.82205e-05
2	18850542	68869456	85	0.000783438
2	18956557	68996668	85	0.0145135
2	19091856	69111794	85	7.89677e-05
2	19227634	69330118	85	0.00241058
2	19350250	69444241	85	0.0250264
2	19465447	69617677	85	4.93213e-05
2	19679938	69750113	85	0.0141699
2	19792115	69903576	85	0.0117501
2	19999346	70005173	85	0.023376
2	20100988	70106832	85	0.000245129
2	20202811	70225397	85	0.00388577
2	20306629	70327744	85	0.00194858
2	20412197	70445399	85	0.0020767
2	20513364	70545888	85	0.00126918
2	20623085	70655268	85	0.0251409
2	20724807	70803469	85	0.000944665
2	20829117	71012604	85	0.000713516
2	21053683	71163173	85	1.48998e-06
2	21220955	71267806	85	0.00532463
2	21386353	71514522	85	0.000204101
2	21594326	71614988	85	0.00127903
2	21694451	71803180	85	0.07574
2	21919338	72086013	85	0.00242238
2	22132882	72189332	85	0.016519
2	22662524	72979172	85	0.00222005
2	23025028	73154613	85	0.0153618
2	23333075	73424099	85	0.024061
2	23433113	73578577	85	0
2	23584767	73678616	85	0.00228682
2	23704874	73779507	85	0.0602908
2	24629577	74920971	85	0.00227802
2	25028486	75075402	85	0.00405721
2	25137323	75190985	85	0.00466961
2	25239264	75291521	85	3.64219e-05
2	25339658	75404664	85	0.0123475
2	25466888	75507656	85	0.0111477
2	25572927	75618460	85	0.00422086
2	25680679	75779403	85	0.0294333
2	25788310	75879452	85	0.0189818
2	25892571	75994637	85	0.0196688
2	26013180	76193036	85	0.00554908
2	26273687	76296924	85	0.0161759
2	26374245	76413962	85	0.00600401
2	26474631	76517005	85	0.00460667
2	26635442	76726553	85	0.00883283
2	26804247	76899147	85	0.0166164
2	26911509	77099755	85	0.00502097
2	27242935	77340647	85	0.0173889
2	27353507	77461781	85	0.00431651
2	27598097	77671495	85	0.00599555
2	27730940	77786742	85	5.78597e-05
2	27830990	77887421	85	0.0122168
2	27935903	77990389	85	7.84813e-05
2	28360104	78690735	85	0.00820989
2	28704616	78792887	85	0.0257479
2	28830071	78906926	85	0.0477814
2	28968811	79007004	85	0.0136929
2	29076282	79108250	85	0.00339286
2	29177344	79222618	85	0.00598748
2	29281209	79325315	85	0.00325198
2	29412717	79455390	85	0.00810064
2	29533736	79578728	85	0.000385875
2	29639926	79725441	85	0.00150889
2	29758503	79878664	85	0.0229522
2	29905304	80045133	85	0.000741741
2	30083631	80153995	85	0.00570791
2	30259377	80273779	85	0.00233285
2	30359532	80385817	85	0.00665813
2	30483397	80540530	85	0.00161872
2	30583828	80677310	85	0.00596626
2	30884183	81108329	85	0.000719415
2	31112300	81209934	85	0.00838161
2	31240837	81310957	85	0.000403764
2	31346493	81418881	85	0.0089987
2	31449497	81720176	85	0.000198863
2	31672777	82279895	85	0.0575883
2	31792861	82380047	85	0.00122911
2	32325414	82491434	85	0.0148077
2	32541438	82884772	85	0.0507549
2	32926031	82995149	85	0.00168357
2	33072056	83098489	85	0.00532993
2	33172136	84059017	85	0.00325768
2	33488932	85418906	85	0.00375745
2	33733554	85992886	85	0.0158573
2	33951492	86147123	85	0.0057571
2	34111967	88446892	85	0.00536822
2	34238100	88650941	85	0.000112065
2	112167931	172110323	85	0.000167172
2	113664409	173395365	85	0.043835
2	113765780	173495629	85	0.0270487
2	113865834	173672419	85	0.0163954
2	115303050	174532277	85	1.80282e-05
2	118020447	176283878	85	0.00635833
2	118358313	176563323	85	0.0490258
2	118474817	176712492	85	0.00139932
2	119784193	177553180	85	2.90093e-06
2	119897990	177760323	85	0.00268655
2	120386952	179164518	85	0.000217174
2	120743436	179284643	85	0.000284144
2	121161054	180139783	85	0.00568968
2	121393032	180914880	85	0.0268685
2	157104573	217043965	85	0.00242438
2	157740487	217529631	85	2.87107e-05
2	158633881	217916052	85	0.014185
2	158779768	218016330	85	0.006923
2	159055166	218711440	85	0.00064554
2	159597688	218812081	85	0.00919876
2	160110797	218914824	85	0.0204044
2	161789140	219159527	85	0.00434298
2	162966841	219863656	85	0.0197499
2	163737373	220470622	85	0.027012
2	164412480	220792320	85	0.013619
2	166107917	221750516	85	0.00379949
2	167293320	221851733	85	0.0284118
2	167982976	222076809	85	0.000775749
2	168558146	222479543	85	0.0275805
2	168876004	222589237	85	0.00240014
2	169224341	222917491	85	0.0462656
2	169576076	223020328	85	0.000711159
2	169687680	223167285	85	0.000869572
2	169903096	223415918	85	0.000434708
2	170204800	223823654	85	6.11127e-05
2	170392905	224207115	85	0.000271472
2	171142750	224615403	85	0.000744563
2	171243250	224727978	85	0.0508092
2	171360896	224960895	85	0.00719604
2	171749919	226174087	85	0.00801976
2	172520642	227013189	85	0.0240462
2	173999233	228025756	85	0.00391514
2	174253761	228126175	85	0.00291974
2	174673608	228676922	85	0.0626121
2	179020367	231659258	85	0.00994928
2	180241595	231759909	85	0.0190885
2	180357586	231865269	85	0.0204475
2	180573636	232263127	85	2.72867e-05
2	180813645	232394519	85	0.0698536
2	181031327	232539179	85	0.00612437
2	181710499	232872759	85	0.0227304
2	181825225	233298119	85	0.000475441
2	182289461	233400074	85	0.00160478
2	182722828	233510622	85	0.0120465
2	183393680	233612557	85	0.00910048
2	183614670	233715636	85	6.04658e-06
2	183776278	234233491	85	4.83368e-05
2	184349492	234457900	85	0.000156289
2	184823267	234885030	85	0.000287152
2	184925154	234990709	85	0.00683817
2	185025197	235133703	85	0.00237777
2	185228030	235239488	85	0.063473
2	185743953	235836422	85	0.0102303
2	185864874	235936607	85	0.00589279
2	185969146	236045303	85	0.00294338
2	186074954	236174661	85	0.0102906
2	186176136	236278466	85	0.024767
2	186302078	236392425	85	0.00321491
2	186403718	236492988	85	0.000171748
2	186503883	236618388	85	0.0220738
2	186775467	236950277	85	0.00583815
2	187395361	237460150	85	0.0151314
2	187501742	237578513	85	0.00294287
2	187620297	237681465	85	0.0137908
2	187726500	237822978	85	0.000119804
2	187848057	237924263	85	0.0278556
2	187950418	238117179	85	0.0029828
2	188159178	238219499	85	0.000616383
2	188259620	238494319	85	0.0090288
2	188550030	238605891	85	0.000495533
2	188650984	238708164	85	0.000292197
2	188771798	238814996	85	0.000257995
2	188995964	239020497	85	0.00735852
2	189096435	239127229	85	0.0177242
2	189199195	239243748	85	0.00047712
2	189308284	239344070	85	0.00450982
2	189425664	239451812	85	0.0073037
2	189744210	239776585	85	0.00965254
2	189847300	239892918	85	0.0267975
2	189947814	239997710	85	5.63831e-06
2	190056582	240112014	85	0.0031354
2	190167593	240275597	85	0.0016019
2	190313512	240397047	85	6.94444e-05
2	190526205	240625290	85	0.000214725
2	190628115	240726562	85	0.00268816
2	190730049	240856425	85	0.0041806
2	190934263	240956738	85	0.00424114
2	191034776	241063765	85	0.00641635
2	191136383	241209077	85	0.00141408
2	191236440	241311095	85	0.0150734
2	191341366	241416020	85	0.00651941
2	191442468	241516454	85	0.0208328
2	191545147	241626661	85	0.000326087
2	191645226	241815473	85	1.15789e-05
2	191900449	241951009	85	4.96209e-05
2	192000919	242051063	85	0.0425101
2	192142226	242176019	85	0.0101178
2	192242740	242276441	85	0.0014227
2	192343638	242478539	85	0.0735536
2	192492006	242593679	85	0.00691933
2	192604507	242694399	85	0.00218218
2	192726549	242795673	85	9.08556e-05
2	192827512	242902505	85	0.0331928
2	192975204	243013210	85	0.00509071
3	74748	50113034	85	0.00351407
3	206063	50216114	85	1.45334e-05
3	306714	50332697	85	0.00102224
3	414050	50517669	85	0.000964559
3	560586	50856529	85	0.000591743
3	924463	51048814	85	0.0148683
3	1125739	51395857	85	0.0070851
3	1530004	51868324	85	0.0037827
3	1880191	52829633	85	0.00192954
3	2886447	52932679	85	0.021322
3	2991404	53105538	85	0.0152125
3	3124500	53206065	85	0.00590862
3	3234025	53325905	85	0.0334454
3	3343909	53428186	85	0.000264197
3	3444681	53560068	85	0.00449467
3	3659256	53721851	85	0.00886988
3	3769134	53847062	85	0.00124218
3	3886847	53947516	85	0.00727642
3	3988189	54055615	85	0.00336483
3	4102772	54157070	85	0.000980554
3	4204057	54257709	85	0.0483094
3	4397345	54486807	85	0.0296127
3	4501234	54590951	85	0.00669409
3	4607533	54725444	85	0.00356933
3	4813517	54880461	85	0.00265434
3	4942300	54994226	85	0.0064452
3	5042802	55124481	85	0.000184109
3	5142959	55230866	85	0
3	5317068	55414319	85	0.00172737
3	5454253	55548726	85	0.00309298
3	5561199	55703603	85	0.0188354
3	5798892	55899845	85	0.016489
3	6000031	56000912	85	8.69806e-05
3	6120442	56208486	85	0.00260122
3	6221922	56328592	85	0.0303174
3	6406797	56536587	85	0.0251794
3	6601604	56637736	85	0.00817871
3	6701851	56742474	85	0.0237199
3	6819595	56852389	85	0.0115656
3	6923647	56953174	85	0.0274715
3	7036645	57069226	85	0.00015464
3	7299331	57372509	85	0.00147774
3	7419156	57540733	85	0.000989908
3	7586237	57702473	85	0.000656814
3	7727101	57944006	85	3.09276e-05
3	7962284	58076491	85	0.00275952
3	8162513	58177843	85	0.00489462
3	8321773	58409126	85	0.0028194
3	8421792	58577212	85	0.00215365
3	8579342	58823093	85	0.0509183
3	8800398	59897085	85	0.00160822
3	9008174	59997112	85	0.00884042
3	9153606	60100426	85	0.00234627
3	9300481	60349109	85	0.00320087
3	9418510	60496438	85	3.38864e-06
3	10060425	60615590	85	0.0748648
3	10470507	60997172	85	0.000145851
3	10774759	61620749	85	0.00987668
3	11044684	61724509	85	0.0131362
3	11195304	62044848	85	0.00449836
3	11295944	62246422	85	0.00550266
3	11817421	62594564	85	0.015846
3	12038264	62694913	85	0.055945
3	12816197	62940257	85	0.00265455
3	12981873	63078699	85	0.00345213
3	13105701	63179291	85	0.0427358
3	13325515	63638955	85	0.00652016
3	13634560	63742663	85	0.0251144
3	13774578	64120052	85	6.03337e-05
3	13876909	64326764	85	0.0148627
3	14321390	64438795	85	8.67784e-05
3	14438636	64539565	85	1.54522e-05
3	14551444	65096485	85	0.00493106
3	14670155	65405673	85	0.0170518
3	14923970	65676690	85	0.00819265
3	15050470	65778307	85	0.0479369
3	15411582	65902598	85	0.0343385
3	15931099	66003182	85	0.000444412
3	16043137	66127362	85	0.00439358
3	16254172	66568741	85	0.0293082
3	16385395	66718798	85	0.00277386
3	16767286	66833592	85	1.01858e-05
3	16868913	67008841	85	0.0055577
3	17072798	67128383	85	0.00191071
3	17181947	67261121	85	0.00356072
3	17954907	68056725	85	0.0396407
3	18290533	68299362	85	0.0695935
3	18392551	68461123	85	0.000590168
3	18557288	68586522	85	0.0121428
3	18670177	68720845	85	0.0142586
3	18776062	68841343	85	0.000271704
3	18877206	68945221	85	0.00332029
3	19013430	69082657	85	0.000224702
3	19114275	69182974	85	0.0150658
3	19238690	69307885	85	0.00981851
3	19351095	69408982	85	0.0204253
3	19589310	69677961	85	0.000776007
3	19691376	69796492	85	0.0150767
3	19952523	70138308	85	0.0136215
3	20176298	70258762	85	0.0172188
3	20352474	70373196	85	0.0196957
3	20454279	70475237	85	0.00366934
3	20644276	70699584	85	0.00425432
3	20744496	70900385	85	0.00438136
3	20999820	71039394	85	0.00137354
3	21135162	71216984	85	0.0588748
3	21277359	71326733	85	0.00618638
3	21462754	71611729	85	0.00817515
3	21628392	71731077	85	0.00256544
3	21781727	71836902	85	0.00769846
3	21900639	72007142	85	0.0304544
3	22110416	72139289	85	0.00256797
3	22256198	72264780	85	0.00281529
3	22401243	72478611	85	5.45521e-07
3	22501888	72581012	85	0.0119844
3	22644920	72695932	85	0.00210873
3	22745194	72967852	85	0.00326035
3	23077761	73173272	85	0.00850053
3	23197425	73277924	85	0.00418036
3	23373052	73398221	85	0.00766455
3	23649051	73807858	85	0.0189897
3	23885960	73908748	85	0.0035633
3	24086516	74112675	85	0.00288695
3	24186625	74234736	85	0.000732923
3	24286878	74344134	85	0.00745987
3	24393147	74448496	85	0.00266992
3	24510794	74558741	85	0.000995908
3	24629663	74678004	85	3.28756e-05
3	24732019	74778244	85	0.00454289
3	24834959	74882339	85	0.00591294
3	25165957	75276627	85	0.0227423
3	25453181	75528142	85	0.000688951
3	25569355	75803061	85	0.0106702
3	25965247	76111720	85	0.036417
3	26549355	76581907	85	0.000835607
3	26673690	76751852	85	0.0327358
3	26774453	76863912	85	0.000639181
3	26875558	76964039	85	0.00194859
3	27026003	77098859	85	0.000619614
3	27327143	77429959	85	0.00988208
3	27614663	77630854	85	0.0014788
3	27783015	77847497	85	0.0114634
3	28009822	78213210	85	0.000339131
3	28540503	78559012	85	0.0182509
3	28648944	78698037	85	0.00100756
3	28751586	78899148	85	0.0137553
3	29023488	79132778	85	0.0342489
3	29148865	79527377	85	0.00991003
3	29593014	79627677	85	0.0186996
3	29702018	79798955	85	0.0543618
3	29813088	79900562	85	0.0176279
3	30161239	80227502	85	0.0842565
3	30267757	80328952	85	0.00524283
3	30368930	80452014	85	2.01792e-05
3	30470027	80552850	85	0.0226951
3	30572492	81502898	85	0.00417788
3	30836973	82477875	85	0.0290584
3	31025980	82969324	85	0.00189382
3	31332156	83901381	85	0.0424864
3	31433156	84004846	85	0.0123258
3	31711974	84932956	85	0.00097281
3	31839097	86620360	85	0.0268775
3	31943706	88019493	85	0.0388761
3	32124926	88603618	85	0
3	32236058	88869558	85	0.0136631
3	93527449	150369151	85	0.0100158
3	93977775	150469735	85	0.0232919
3	94296236	150570083	85	0.000358885
3	95087142	150673474	85	0.000895579
3	97694089	150775927	85	0.00175886
3	97969152	150882927	85	0.00286494
3	98250862	151090424	85	0.0105416
3	98358228	151281488	85	0.00466413
3	98541633	151396132	85	0.00172659
3	98831012	151531989	85	0.0322928
3	99067458	151862407	85	0.0198728
3	99287536	152042244	85	0.0103218
3	100076823	152258133	85	0.00525093
3	100228679	152358911	85	0.0272513
3	100631579	152785719	85	0.000637635
3	100844373	153189036	85	0.000236801
3	100951128	153297025	85	0.0132935
3	101574503	153400864	85	0.00952578
3	101740809	153506651	85	0.0219152
3	101841470	153607875	85	0.00114414
3	101976792	154328485	85	0.00121498
3	102142692	154584947	85	4.15847e-06
3	102424262	154731906	85	0.0119502
3	102915517	154867266	85	0.000835579
3	103434102	154990758	85	0.00198826
3	103746240	155218042	85	0.00222401
3	104050699	155430061	85	0.0919811
3	104179702	156009925	85	0.0307351
3	104590454	156158932	85	0.00495821
3	104905639	156259485	85	0.00475336
3	105040130	156856967	85	0.0127842
3	105465189	157312557	85	0.00174087
3	105819921	157427789	85	0.00228675
3	106020685	157587098	85	0.0178794
3	106128036	157829953	85	0.0599658
3	106228774	158655814	85	0.0362854
3	106523235	159160194	85	0.000234939
3	106625891	159455394	85	0.0294792
3	106962503	159586759	85	0.00339286
3	107065392	159729117	85	0.0511877
3	107225146	159876384	85	0.00219944
3	107503874	160023320	85	0.00310351
3	107719289	160419570	85	0.0314309
3	108086193	160951798	85	0.036836
3	108189735	161222198	85	0.0411408
3	108494973	161396297	85	0.0163919
3	108616134	161525654	85	0.00657995
3	108791209	161772005	85	0.00773129
3	108935772	161872014	85	0.0146599
3	109073916	162406183	85	0.00905152
3	109200048	162507511	85	0.014967
3	109376723	163170488	85	0.00502689
3	109521072	163311175	85	0.000682884
3	109649034	163578232	85	0.0485793
3	109749324	163758592	85	0.0186357
3	109849346	164247760	85	0.00695745
3	110050013	164449142	85	0.00239876
3	110197294	165009421	85	0.0120398
3	110328623	165125159	85	0.0112105
3	110585838	165505274	85	0.00381314
3	110931595	165984118	85	0.0293503
3	111131512	167284676	85	0.0107372
3	111521616	167385266	85	0.00349433
3	111633513	167606233	85	0.000878916
3	111824072	167929677	85	0.00594371
3	112184927	168342242	85	0.0219139
3	112811861	168927453	85	0.00683513
3	112913505	169032669	85	0.00209229
3	113117177	169133080	85	0.0187044
3	113377361	169529958	85	0.0218382
3	113595909	169638363	85	0.0174643
3	113762574	170142006	85	0.0243075
3	114031446	170242121	85	0.00972697
3	114233596	170362110	85	0.00726993
3	114336424	170596118	85	0.0282506
3	114550006	170825115	85	0.00333162
3	115125320	170941764	85	0.0104005
3	115240375	171062519	85	0.0262498
3	115347149	171172250	85	0.00144288
3	115630419	171282951	85	0.000171468
3	115803711	171572670	85	0.0444282
3	116166378	171679415	85	0.000290582
3	116435653	171779873	85	0.0146395
3	116554909	171881016	85	0.00355407
3	116755811	172020156	85	0.00155215
3	116925746	172127929	85	0.0036301
3	117158450	172356274	85	1.52902e-07
3	117294197	172488374	85	0.0231837
3	117717570	172589113	85	0.00613237
3	118022111	172766822	85	0.0036763
3	118381303	173089355	85	0.00911293
3	119403145	173323691	85	0.000769158
3	119608141	173430745	85	0.0406836
3	120280776	173720585	85	0.00188012
3	122100447	174029979	85	0.000536116
3	122301498	174260303	85	0.00539584
3	122428261	174873699	85	0.0103474
3	123070421	175329367	85	0.00800799
3	123198912	175712812	85	0.0010202
3	123635213	175914226	85	7.65453e-05
3	123946963	176124442	85	0.0227932
3	124068336	176226619	85	0.0072308
3	124291069	176384982	85	0.0145094
3	124728626	176692320	85	0.00326775
3	124838938	177054079	85	2.00417e-05
3	125146303	177170859	85	0.00212783
3	125457879	177321475	85	0.0116376
3	125971846	177444451	85	0.00467996
3	126180047	177544515	85	0.000184253
3	126287440	177839912	85	0.00104494
3	126416594	177955469	85	0.00947553
3	126620149	178183370	85	0.00902744
3	126867389	178569705	85	0.00141784
3	127171689	178921158	85	0.0556695
3	127295759	179048073	85	0.00534301
3	127558955	179514386	85	0.0142841
3	127709069	179878411	85	0.00114546
3	127872796	180149326	85	0.00710537
3	128170341	180453449	85	0.00293844
3	128326807	181382950	85	0.0119269
3	128823122	181496339	85	0.00190686
3	129315769	181617660	85	0.0375926
3	130124491	181721026	85	0.00835698
3	130244120	181917076	85	0.00371626
3	130361856	182226504	85	0.00248893
3	130644929	182402101	85	0.00800872
3	131809297	182507758	85	0.00641661
3	131910161	182984048	85	0.0277278
3	132079613	183084540	85	6.01673e-06
3	132193119	183301774	85	0.00156641
3	132957885	183401931	85	0.00182349
3	133105849	183756742	85	0.000839918
3	133227514	184216307	85	0.00121078
3	133330224	184320524	85	0.0121195
3	133713660	184423623	85	8.29684e-05
3	134059150	184894478	85	0.000392108
3	134481809	185624781	85	0.0132621
3	134583117	185730049	85	0.0164033
3	134795468	185977740	85	0.00030615
3	135434791	186081823	85	2.7945e-05
3	136231067	186296254	85	0.00372774
3	136337029	186412156	85	0.0041539
3	136444589	186521402	85	0.00443864
3	136548919	186626069	85	0.0559554
3	136671890	186765341	85	0.000828334
3	136848730	186865439	85	0.0466289
3	137008036	187088656	85	0.0583608
3	137109177	187204738	85	0.00588807
3	137250416	187330821	85	0.0367125
3	137447832	187462296	85	0.0144058
3	137654696	187763061	85	0.00310433
3	137772478	187865100	85	0.00720927
3	137873177	188011407	85	0.00024909
3	138111443	188115232	85	0.0017051
3	138281276	188337267	85	0.0336174
3	138602992	188881482	85	0.0293483
3	139049804	189251363	85	0.0448065
3	139265052	189351612	85	0.0092734
3	139365567	189454823	85	0.00101641
3	139471326	189564705	85	1.39848e-05
3	139635017	189667190	85	0.00958433
3	139736502	189834992	85	0.00233965
3	139840107	189949214	85	0.0116671
3	140044977	190051212	85	0.0142303
3	140164183	190287285	85	0.0112164
3	140383011	190409657	85	0.0189022
3	140623504	190627617	85	0.127806
3	140830084	190885461	85	0.000869311
3	140931915	190985887	85	0.0132326
3	141136727	191187667	85	0.000378942
3	141345291	191415792	85	0.0155456
3	141452835	191516139	85	0.000243348
3	141556977	191659517	85	0.000518606
3	141772101	191775508	85	0.00375429
3	141872356	191876020	85	0.00894592
3	141973226	192019370	85	0.000188218
3	142167976	192231645	85	0.00253803
3	142271797	192337670	85	0.00802729
3	142384363	192437828	85	0.023835
3	142484664	192547128	85	0.016647
3	142603915	192759040	85	0.018041
3	142829109	192950244	85	0.00181
3	143099281	193344955	85	0.00947286
3	143403284	193449406	85	0.0277947
3	143510960	193549408	85	0.00434964
3	143713835	193752079	85	8.37577e-06
3	143816936	193904406	85	0.00945645
3	143920583	194014872	85	0.00361904
3	144101799	194120998	85	0.0181533
3	144533421	194543353	85	0.0149882
3	144646410	194667524	85	0.00181742
3	144778595	194870922	85	0.0171221
3	144927495	195248757	85	0.000654622
3	145372738	195541687	85	0.0196575
3	145632742	195646776	85	0.0116446
3	145732933	195751543	85	0.00914339
3	145835083	195854522	85	0.000908904
3	145961239	196158128	85	0.048504
3	146230714	196261452	85	0.00393264
3	146372396	196499619	85	0.000409214
3	146604996	196737295	85	0.0209728
3	146869609	196939883	85	0.0149696
3	146980646	197050773	85	0.000982916
3	147094030	197154507	85	0.00102855
3	147209965	197255522	85	0.00315778
3	147347401	197600630	85	0.0110554
4	3334901	53359610	85	0.0246926
4	3437624	53606294	85	0.0290735
4	4099959	54196720	85	0.00284038
4	4219088	54300591	85	0.0191012
4	4354104	54421387	85	0.0171806
4	5791206	55885952	85	0.01871
4	6157573	56262374	85	0.0108765
4	6367467	56462845	85	0.0263779
4	6776649	56835413	85	0.000296119
4	6907052	56947580	85	0.000683885
4	7460233	57507741	85	0.0464379
4	7675324	57792078	85	0.0191212
4	7960418	58023238	85	0.00350191
4	8072684	58192200	85	0.00196871
4	8310680	58811380	85	0.0111327
4	8607580	59705592	85	0.00131188
4	8738088	60314238	85	0.00566419
4	9879728	60485991	85	0.0131968
4	10082464	60614522	85	0.0200796
4	10515154	60820731	85	0.00382264
4	10699054	60922770	85	0.00564191
4	10859405	61425434	85	0.0316443
4	11069265	61879934	85	0.0199533
4	11309819	61981727	85	0.0025405
4	11530345	62431444	85	0.0200708
4	12143367	62848246	85	0.00474289
4	12301120	63243416	85	0.0472671
4	12542220	63369997	85	0.00367283
4	12917907	63840250	85	0.000144592
4	13024822	63975018	85	0.00862245
4	13126998	64335058	85	0.00616485
4	13308663	64601665	85	0.00374147
4	13548911	65852350	85	0.015845
4	13851752	66373380	85	0.0032886
4	14102069	66811962	85	0.000101268
4	14206486	67139606	85	0.00516294
4	14468276	67645314	85	0.00124864
4	14822283	68061006	85	0.00316917
4	14990729	68535741	85	0.0278364
4	15168310	68777054	85	0.00117507
4	15914034	69176962	85	0.00494195
4	16018755	69780773	85	0.0105633
4	16204349	70342579	85	0.0115748
4	16316313	70443748	85	0.0023114
4	16495440	70600199	85	0.00272027
4	16646025	71114956	85	0.00309869
4	16785921	71832736	85	0.00272545
4	17183188	71934958	85	0.00471425
4	17289928	72377595	85	0.0158641
4	17390785	72566972	85	2.80773e-05
4	17596461	72885144	85	6.80272e-06
4	17803267	73185863	85	0.0282663
4	18370230	73498500	85	0.0017017
4	18626266	73616850	85	0.00505945
4	18752760	73717249	85	0.0301821
4	18854283	74626051	85	0.00105448
4	19150192	74903134	85	0.0118311
4	19861039	75259405	85	0.0298007
4	20485683	75662515	85	0.00138424
4	20771062	75805734	85	0.00146581
4	21060675	75913569	85	0.0113846
4	21300290	76015491	85	0.0081784
4	21504613	76288000	85	0.0101263
4	21709519	76496817	85	0.00326672
4	21810740	76600432	85	0.00136622
4	22239453	76855106	85	0.00494196
4	22706151	77055474	85	0.000383142
4	22820489	77157718	85	0.0155093
4	23025511	77364799	85	0.0297081
4	23488892	77522427	85	0.0222847
4	23813752	77773610	85	0.00468287
4	24217818	77992344	85	0.0100402
4	24324140	78136519	85	0.00651941
4	24614252	78561965	85	0.00234537
4	24845594	78997515	85	0.00485446
4	24996270	79277448	85	0.00518723
4	25114103	80021947	85	0.0023847
4	25555837	80129771	85	0.0103543
4	25655958	80406217	85	0.00253822
4	25760885	80852826	85	0.0011656
4	25869511	81204740	85	0.000296302
4	25982718	81476061	85	0.000183196
4	26085368	81955055	85	0.00972985
4	26199671	82223877	85	0.0188055
4	26361568	82408395	85	0.0583906
4	26585881	82608434	85	0.0189145
4	26888652	82762284	85	3.79021e-06
4	27337756	83011268	85	0.0454296
4	27438947	83365986	85	0.00252868
4	27730646	83468479	85	0.00938117
4	27830726	83582064	85	0.000729931
4	27966682	83751302	85	0.00624341
4	28890918	84331768	85	0.0178962
4	29054002	84766738	85	0.00311795
4	29297309	84871065	85	0.00336101
4	29435416	85083860	85	0.011775
4	29826126	85317299	85	0.0116594
4	30159807	86595137	85	0.0119968
4	30274533	86708489	85	0.014062
4	30521321	86947989	85	0.0200264
4	31044237	87048233	85	0.00737614
4	31255050	88282796	85	0.0412899
4	31461728	88959381	85	0.0499826
4	31739254	89165737	85	0.00156078
4	31839497	89443162	85	0.0673558
4	32390177	89546267	85	0.00391743
4	32695806	90169925	85	0.000102853
4	33200295	90273098	85	0.0139016
4	33348144	90546806	85	0.0141651
4	34233769	90703029	85	0.0116299
4	34348739	90873421	85	0.0308282
4	34498265	91284888	85	0.0173949
4	34683998	91464981	85	0.0132525
4	35091484	91586793	85	0.00288551
4	35271245	92187591	85	0.0160332
4	35402941	92313959	85	0.01313
4	35505319	92424425	85	0.000914687
4	35725647	92750394	85	0.014219
4	35885873	92899298	85	0.0149607
4	36094131	93535853	85	2.19872e-07
4	36323138	94186637	85	0.000675906
4	36423982	94383656	85	0.00840394
4	37000834	94718224	85	0.00797979
4	37257069	94839209	85	0.000503078
4	37360817	94999873	85	0.00521686
4	37473384	95601206	85	0.00197991
4	37582073	95709925	85	0.00501391
4	37684896	96213928	85	0.00368436
4	37799735	96320530	85	0.015722
4	37906032	96480061	85	1.71023e-06
4	38316530	96913312	85	0.0197095
4	38419017	97133418	85	0.00220515
4	38533499	97784254	85	0.000552162
4	38635358	97915370	85	3.29326e-05
4	38945169	98645122	85	0.00116585
4	54624516	110986845	85	0.00235103
4	55685176	113898731	85	0.00801264
4	107245851	167196318	85	0.000350886
4	107680797	167649758	85	0.00162361
4	107889798	167820216	85	0.0014788
4	108093919	167932327	85	0.0136904
4	108677484	168663561	85	0.00463471
4	109104841	168961356	85	4.68625e-05
4	109610141	169508176	85	4.23561e-06
4	109811003	169608218	85	0.0102997
4	111112448	169977902	85	0.000332786
4	111227771	170081703	85	0.000419437
4	112656975	172563035	85	0.000373808
4	113002238	172701103	85	0.000889009
4	113630486	172950287	85	0.000330809
4	114102929	173930848	85	0.017012
4	115544777	174820018	85	0.0238431
4	115813013	174966483	85	0.0167911
4	116727973	175068035	85	0.0248316
4	117250083	175443156	85	0.0134462
4	118269184	175599699	85	1.29446e-05
4	118472730	175740771	85	0.010075
4	118575663	176028670	85	0.0146169
4	119200331	176509403	85	0.0553764
4	119880379	176629971	85	0.050697
4	119994033	176808453	85	0.0209226
4	120960633	176947367	85	0.000313258
4	121123890	177097770	85	0.00308436
4	121395169	177211074	85	0.0260221
4	121597967	177340183	85	0.00128053
4	122329128	177477563	85	0.00617139
4	122431055	177580725	85	0.0300218
4	122569357	177680817	85	0.0147436
4	122669403	178014818	85	0.0217068
4	123417468	178279992	85	0.00161321
4	123748524	178394246	85	0.0272604
4	124370868	178760454	85	0.00604885
4	124472197	178954347	85	0.000166068
4	124656077	179055616	85	0
4	124888608	179170179	85	0.00605796
4	124991036	179273689	85	9.91103e-05
4	125550266	179482210	85	0.00962137
4	125990460	179586532	85	0.00660493
4	126347460	179833001	85	0.0554722
4	126733477	179969050	85	0.00104509
4	127265939	180178361	85	0.00636829
4	127369690	180393970	85	0.000113619
4	127654552	180655000	85	0.0216227
4	128473905	180850835	85	5.46937e-05
4	129651071	181056382	85	0.00323025
4	129774375	181160285	85	0.00300001
4	130228725	181271035	85	0.0171193
4	130373727	181400257	85	0.00115191
4	131214560	181569859	85	0.000480038
4	131316723	181711662	85	0.00268331
4	131792029	181834746	85	0.00158965
4	131963602	182008075	85	4.30859e-05
4	132066374	182118509	85	0.00668866
4	132167492	182241408	85	0.0461558
4	132271688	182344782	85	0.020363
4	132378391	182449557	85	0.0303115
4	132496097	182552366	85	1.04593e-05
4	132880859	182990709	85	0.0039107
4	133136256	183218931	85	0.00363275
4	133236627	183367131	85	0.0076158
4	133441627	183498428	85	0.00752158
4	133544146	183601666	85	0.000330778
4	133644860	183713191	85	0.0272466
4	133750858	183813425	85	0.00531614
4	133853457	184076557	85	0.0022457
4	134161677	184298034	85	0.00612587
4	134613744	184631600	85	0.00226107
4	134791251	184866677	85	0.031229
4	134940480	184973306	85	3.85641e-06
4	135042534	185075448	85	0.0315635
4	135218739	185278885	85	0.00674444
4	135540238	185651451	85	0.00820089
4	135677555	185774607	85	0.0016693
4	135780372	185882953	85	0.00149753
4	135958629	186025514	85	0.0098208
4	136140225	186269697	85	0.0191049
4	136344912	186379735	85	0.00539254
4	136460469	186509747	85	0.000362461
4	136642160	186719243	85	0.00175051
4	136753035	186839098	85	0.000385119
4	136854593	186939700	85	0.00944819
4	136969266	187058250	85	0.00858126
4	137128953	187161506	85	0.0422949
4	137229108	187271075	85	0.0090182
4	137335075	187391203	85	0.000501065
4	137437420	187494926	85	0.00151725
4	137559518	187630905	85	0.000355258
4	137675158	187731001	85	0.000642271
4	137882910	187943283	85	0.00703118
4	137983935	188045769	85	0.000343929
4	138090406	188147465	85	8.40043e-05
4	138224531	188258161	85	0.0040659
4	138424568	188513024	85	9.89674e-07
4	138553215	188613238	85	0.0129652
4	138774845	188831767	85	0.035461
4	139149032	189243534	85	0.0468566
4	139250631	189344762	85	0.00154132
4	139365817	189536211	85	0.00460455
4	139591081	189666512	85	0.00572326
4	139753601	189766744	85	0.00307303
4	140222480	190309915	85	0.00599077
4	140451377	190633273	85	0.000521316
5	72404	50162734	85	0.00581058
5	198620	50265086	85	0.000236801
5	299437	50365841	85	0.024746
5	416638	50465915	85	0.00128801
5	516808	50625038	85	0.0121195
5	873591	50990350	85	3.15329e-05
5	992509	51106384	85	0.0309098
5	1109568	51206652	85	0.00376542
5	1211556	51307170	85	8.227e-06
5	1357756	51425511	85	1.46022e-05
5	1458946	51743224	85	0.00724479
5	1755602	52314823	85	0.00362241
5	2011581	53081468	85	0.0602042
5	2119454	53547960	85	0.000145865
5	2219647	53837568	85	0.000310722
5	2319964	53939257	85	0.0172434
5	2424193	54062444	85	0.0180363
5	2625570	54573899	85	0.0223009
5	2742052	55219716	85	0.00187478
5	2844917	55444683	85	0.00129426
5	2948346	55566527	85	3.25289e-05
5	3171174	56323501	85	0.0170651
5	3281517	56424014	85	0.00481981
5	3383490	56947398	85	0.00114438
5	3483594	57307361	85	0.00212884
5	3605177	57414311	85	0.00125762
5	3750740	58175030	85	0.0340861
5	3865308	58376391	85	0.00625584
5	4066184	58679021	85	2.83807e-05
5	4225726	59261438	85	0.0203285
5	4335547	59634025	85	0.0146109
5	4438001	60760700	85	0.00872083
5	4556110	60976677	85	0.00694554
5	4666170	61978989	85	0.053736
5	4801119	62079465	85	0.000306995
5	4986095	62486178	85	0.0109925
5	5110692	62600850	85	0.0046973
5	90309026	150170609	85	0.00626606
5	90434109	150386198	85	0.00138894
5	90567655	150486911	85	5.32751e-06
5	91215560	150692590	85	0.00165278
5	91931440	150797804	85	0.0816697
5	92072419	150899147	85	0.0166709
5	92501937	151058216	85	0.0021189
5	93180544	151583410	85	0.0721824
5	93795658	151773331	85	0.0114176
5	94172291	152486406	85	0.00210279
5	94274060	152789711	85	0
5	94578715	152938627	85	0.0177535
5	94738448	153098094	85	0.00462686
5	94905843	153546900	85	0.000868229
5	95084131	153762653	85	0.00955407
5	95184918	153970243	85	0.0202207
5	95289634	154136902	85	0.00112744
5	95845972	154495111	85	0.000141898
5	96056119	154958513	85	0.00283518
5	96231372	155122182	85	0.0119093
5	96436068	155293075	85	0.000138964
5	96834801	155557111	85	0.0305059
5	96991565	155754771	85	0.030896
5	97260358	156738830	85	0.00465907
5	97401564	157269721	85	5.7844e-05
5	97739177	157456997	85	0.00531753
5	98094274	157587060	85	0.00235193
5	98612276	157703679	85	0.0744058
5	98714927	157884706	85	5.83807e-05
5	99334618	158186302	85	0.00313476
5	99696831	158300126	85	0.00299735
5	100172018	158530740	85	0.00248808
5	101155575	158635424	85	0.000475835
5	101358348	158957035	85	0.0140347
5	102826438	159283738	85	0.00254395
5	104299574	159655116	85	0.0176512
5	104597234	159828399	85	0.00953687
5	105261114	159949163	85	0.0115781
5	105692401	160098904	85	0.00105018
5	105909035	160385032	85	0.00350382
5	106268585	160485496	85	0.00108764
5	106379448	160587405	85	0.0176743
5	106573402	160772290	85	0.0469234
5	106674516	160911968	85	0.00602626
5	106783105	161144969	85	0.000282395
5	106908278	161782925	85	0.01319
5	107165248	162034933	85	4.93069e-05
5	107297850	162142692	85	0.0396221
5	107550988	162243273	85	0.00493826
5	107665528	162343444	85	0.0107588
5	107890696	162533028	85	0.0183129
5	108586561	163028221	85	3.11409e-05
5	108738261	163400253	85	0.025709
5	109234034	163519791	85	0.0001801
5	109358981	163657788	85	0.00129238
5	109458993	163779956	85	0.00200294
5	109666261	164293049	85	0.00379123
5	110408002	164494112	85	0.00908437
5	110514586	164690314	85	0.00460907
5	110631265	164960803	85	0.0255511
5	110866250	165061117	85	0.0428531
5	111813278	165176693	85	0.0263013
5	111977000	165298684	85	0.00462133
5	112077447	165515543	85	0.0218201
5	112509125	165640662	85	0.000137926
5	112698714	165847345	85	0.00177894
5	113119700	166019748	85	0.0173131
5	113526118	166198761	85	0.0272593
5	113880283	166341244	85	0.00259111
5	115102942	166778493	85	0.0154456
5	115322447	166887629	85	0.00686483
5	115847241	167111093	85	0.0256702
5	115951224	167349703	85	0.0121869
5	116052914	167462685	85	0.0117476
5	116254291	167729272	85	0.0402394
5	116525783	167837202	85	0.0109048
5	116904381	168297997	85	0.031578
5	117698479	168402137	85	0.0203097
5	117853477	168623743	85	0.0490889
5	118371699	168818271	85	0.000442474
5	118659579	168919058	85	0.0113913
5	118810416	169090529	85	0.0104762
5	119117980	169253887	85	0.0328642
5	119320889	169362082	85	6.25147e-05
5	119540158	169598163	85	0.0212441
5	119640911	169701017	85	0.0082435
5	119783693	169804368	85	0.0246083
5	119974750	170047775	85	0.0309661
5	120082951	170170617	85	0.0184102
5	120182989	170318242	85	0.0113567
5	120388440	170422587	85	0.00672892
5	120489483	170562476	85	0.00632473
5	120592185	170662753	85	0.00861599
5	120702434	170794695	85	0.00973588
5	120810967	170907080	85	0.0240116
5	120918192	171030607	85	0.00116505
5	121182514	171283469	85	0.00616006
5	121417463	171480353	85	0.00457012
5	121596064	171621214	85	0.00367518
5	121778361	171784102	85	0.00114822
5	121905828	172024642	85	0.0536831
5	122138145	172240859	85	0.0198179
5	122243817	172360034	85	0.011955
5	122569269	172580866	85	0.00110566
5	122671476	172682217	85	0.0223127
5	122841131	172933842	85	0.0213721
5	122943993	173041234	85	0.00144169
5	123045460	173146525	85	7.34503e-05
5	123248573	173349116	85	0.000174624
5	123366656	173450023	85	0.0214362
5	123466714	173569104	85	9.22858e-05
5	123619308	173670578	85	0.00387799
5	123722799	173772008	85	0.000522139
5	123879894	173944166	85	0.00144904
5	123988063	174050101	85	0.010197
5	124147028	174154172	85	0.0205952
5	124348069	174404097	85	0.0191684
5	124449843	174541854	85	0.0108691
5	124550042	174646299	85	0.0129365
5	124664446	174747899	85	0.0210761
5	124928767	174959280	85	2.79082e-07
5	125053222	175072142	85	0.00299642
5	125175393	175201667	85	0.00200655
5	125276401	175320008	85	0.00529991
5	125410591	175561156	85	0.00108742
5	125625283	175662581	85	0.00198958
5	125731213	175763030	85	0.000412129
5	126168150	176235075	85	0.00299811
5	126701622	176754665	85	0.00596638
5	126821901	176860293	85	0.00280097
5	127054278	177390075	85	9.32096e-05
5	127622747	177715452	85	0.000381539
5	127800623	177819064	85	0.00159469
5	127970454	178022626	85	0.0248047
5	128092151	178125194	85	0.00111386
5	128193116	178233145	85	0.000255013
5	128293750	178337215	85	0.00535436
5	128440508	178451854	85	0.00145986
5	128734557	178764482	85	6.90099e-05
5	128834888	178868301	85	0.000597264
5	128942810	178988608	85	5.60308e-05
5	129434918	179502192	85	5.01901e-05
5	129591456	179602849	85	0.011119
5	129887810	179934559	85	0.0157909
5	130222183	180302934	85	0.0103535
5	130333733	180486247	85	0.00226121
6	209980	50278168	85	0.00322851
6	394266	50693607	85	0.00270938
6	773483	50793744	85	0.00130377
6	875559	50895403	85	0.00283212
6	997888	51191503	85	0.0173425
6	1221088	51297434	85	6.52865e-06
6	1321446	51488237	85	0.0246182
6	1573640	51593875	85	0.00515532
6	1680823	51694906	85	0.000151079
6	1781167	51826782	85	0.000400101
6	1947530	52030961	85	0.00973059
6	2047897	52217185	85	5.46979e-06
6	2512014	52538607	85	0.0234218
6	2680732	52684333	85	0.0117174
6	2783985	52814675	85	0.00675161
6	2886355	53003619	85	0.00463825
6	3157354	53203577	85	0.0015927
6	3257747	53307694	85	0.00670011
6	3359337	53464890	85	0.0328602
6	3477475	53571394	85	0.0106271
6	3581089	53672749	85	0.00788766
6	3701118	53864523	85	0.00585021
6	3957629	53982758	85	0.0108321
6	4059379	54083770	85	0.0177629
6	4236933	54269501	85	0.000400515
6	4374751	54418559	85	0.011501
6	4495016	54524010	85	0.0100365
6	4608253	54649495	85	0.00221778
6	4735335	54750488	85	0.00258341
6	4957263	55113411	85	0.0347465
6	5162634	55215190	85	0.0046201
6	5263065	55315373	85	0.0110452
6	5397319	55456972	85	0.0185181
6	5515203	55562567	85	0.000671339
6	5622514	55746357	85	0.00781432
6	5880415	55916978	85	0.00667747
6	5988985	56017977	85	0.00016238
6	6092876	56130667	85	0.00461686
6	6195060	56244488	85	0.00815386
6	6306405	56344561	85	1.64226e-05
6	6479161	56748499	85	0.000681445
6	6819029	56904617	85	0.00188171
6	6923834	57006933	85	0.00291271
6	7027560	57124881	85	2.19867e-05
6	7147548	57329886	85	0.0322111
6	7374207	57535593	85	0.0736761
6	7542840	57640892	85	0.00028983
6	7654163	57741267	85	0.0180141
6	7754845	57842518	85	0.0554911
6	7862631	57942624	85	8.97991e-06
6	7975277	58043735	85	0.00106969
6	8077033	58197833	85	5.11801e-05
6	8277557	58300019	85	0.00279395
6	8378622	58400802	85	0.00856059
6	11294068	65557699	85	4.82102e-06
6	11410946	66006148	85	0.00025603
6	11587318	66345289	85	0.0262877
6	11687726	67201400	85	0.0508097
6	11789405	67337915	85	0.000415881
6	11969262	67977326	85	0.00446004
6	12093961	68276664	85	0.00495338
6	12216459	68758444	85	0.00200299
6	12355174	69379691	85	0.000241402
6	12464705	70454685	85	0.0178568
6	12576211	70705112	85	0.00228155
6	12678245	70811074	85	0.04329
6	13064501	70915130	85	0.0150793
6	13167258	71025669	85	0.00194962
6	13275570	71126904	85	0.00463058
6	13391155	71374560	85	0.00951387
6	13513622	71600923	85	0.00230655
6	13766393	71707973	85	0.0192931
6	13902624	71939319	85	0.000715671
6	14054510	72258809	85	0.0410296
6	14157507	72535853	85	2.7674e-05
6	14275210	72638932	85	0.0283114
6	14402624	73336288	85	0.022911
6	14767419	73523136	85	0.00206389
6	15137585	73655333	85	0.0198761
6	15482631	73873242	85	0.00834848
6	15791580	73973272	85	0.00613693
6	15964966	74390555	85	0.000375772
6	16073056	74521336	85	0.00704511
6	16175022	74824015	85	2.99336e-06
6	16290862	75071880	85	0.00899188
6	16543263	75885305	85	0.00386243
6	75319740	135287533	85	5.2427e-05
6	76349105	136275334	85	0.0040564
6	77367302	136686366	85	0.0199416
6	78031037	136985212	85	0.00718778
6	78250815	137087967	85	0.00119702
6	79053474	137366196	85	0.0491576
6	79959249	137582057	85	0.000359684
6	80432701	137690520	85	0.0039254
6	81048878	137901303	85	0.00141787
6	81752292	138002637	85	0.00200306
6	81963241	138125335	85	0.00219817
6	82185441	138244943	85	0.000100798
6	82405799	138531504	85	0.0213219
6	83842074	138696398	85	0.00522031
6	84307328	138822472	85	0.0258898
6	85038549	138929434	85	0.057397
6	85309464	139158676	85	0.0130771
6	85743138	139383784	85	0.0187024
6	86427325	139637874	85	0.0369439
6	87691917	139745652	85	1.44919e-05
6	88661802	139859345	85	0.00385965
6	88893510	142545280	85	8.73495e-05
6	89009765	142681409	85	0.0308102
6	89185967	142998843	85	0.00121046
6	89317596	143255175	85	0.00663064
6	89679115	143457259	85	0.000203388
6	90001542	143804283	85	0.00450636
6	90155927	143904357	85	0.00162916
6	90622413	144011213	85	0.0100828
6	90746958	144758799	85	0.00181428
6	91021491	145046922	85	0.0412036
6	91173423	145445372	85	0.0108713
6	91307260	145718056	85	0.0016468
6	91431218	146747330	85	0.0185134
6	91565046	147024306	85	0.0137094
6	91772347	147513709	85	0.0140868
6	91881349	148180185	85	0.0048071
6	92192431	148280803	85	0.00045269
6	92687267	148383186	85	0.000807874
6	92798163	148545616	85	1.3548e-05
6	93509887	148649456	85	0.0002482
6	93788831	148882824	85	0.0129227
6	94093734	149005146	85	0.00777458
6	95017385	149195423	85	0.0118498
6	95367184	149300868	85	0.00298273
6	96487948	149604833	85	0.00108202
6	96756135	149710848	85	0.00214524
6	97223682	150369128	85	0.00389806
6	97422810	150469711	85	0.00599687
6	97523395	150591196	85	0.000629626
6	97959438	150698674	85	0.0118313
6	98206805	150801726	85	0.0451823
6	98974596	151143977	85	0.000752354
6	99111699	151255961	85	0.00337251
6	99720024	151358072	85	0.0198822
6	100170326	151463336	85	0.0149317
6	100430590	151576181	85	0.000486579
6	100593022	151676678	85	0.0111988
6	100699272	151778442	85	0.0611112
6	100801520	151932778	85	0.00302599
6	100952874	152087345	85	0.0264673
6	101371644	152199931	85	0.0043224
6	101866446	152420095	85	0.00313501
6	102099979	152520494	85	0.0126787
6	102663669	152721029	85	0.000543154
6	102766587	152896755	85	0.000139784
6	103029326	153108317	85	0.0051165
6	103334964	153455994	85	3.10156e-05
6	103546728	153557913	85	0.0111606
6	103850620	153873008	85	0.00237777
6	103955819	153980633	85	0.0178365
6	104139066	154307735	85	0.0231181
6	104308085	154413674	85	0.00360711
6	104463297	154574318	85	0.00568505
6	104688675	154692363	85	0.00129565
6	104789111	154798879	85	0.00313866
6	104906419	155213791	85	0.0153397
6	105230636	155325431	85	0.0211891
6	105364421	155483008	85	0.0357328
6	105509485	155585325	85	0.00936747
6	105673973	155741520	85	0.00621399
6	105774061	155966445	85	0.00341495
6	105966654	156083823	85	0.0010307
6	106087952	156353867	85	0.000735999
6	106461787	156631278	85	1.75732e-07
6	106715005	156732748	85	0.00203672
6	106819853	156839512	85	0.000699916
6	106933054	156940451	85	0.00105511
6	107033417	157042018	85	0.0160551
6	107133569	157283159	85	0.0147072
6	107344731	157383274	85	0.00772182
6	107444903	157502888	85	0.000422962
6	107547080	157622852	85	0.0187699
6	107649588	157723634	85	0.0022227
6	107752266	157853575	85	0.0200531
6	107884179	157954044	85	0.00307398
6	108000725	158062597	85	0.000255209
6	108293848	158429278	85	0.00049385
6	108517278	158530037	85	0.00582579
6	108778551	158955158	85	0.0139921
6	108996553	159072350	85	0.0441419
6	109115283	159178345	85	0.00208364
6	109221846	159280133	85	0.0198681
6	109335109	159413181	85	0.00366479
6	109582033	159630286	85	0.0147101
6	109686169	159777318	85	0.0106092
6	109795083	159877702	85	0.00509413
6	109895721	160070931	85	0.00520979
6	110108855	160171608	85	0.0287058
6	110214548	160472032	85	0.0201041
6	110620998	160713848	85	4.2801e-05
6	110752626	160833664	85	0.0196492
6	110911774	160962503	85	0.00568182
6	111337078	161386059	85	0.0135651
6	111572812	161651368	85	0.0304869
6	111674469	161761525	85	0.00817801
6	111778720	161914648	85	0.0198627
6	112006610	162039061	85	0.0051957
6	112118491	162236866	85	0.0166387
6	112272939	162339286	85	2.44667e-05
6	112374944	162477935	85	0.000993158
6	112480041	162578719	85	0.0474716
6	112583218	162688586	85	0.0033191
6	112738713	162789197	85	0.00276299
6	112939940	163021444	85	0.0352959
6	113040775	163135797	85	0.00150805
6	113177202	163239943	85	0.0184347
6	113393530	163523300	85	0.00233041
6	113547561	163635875	85	0.00170521
6	113649143	163956573	85	0.0139909
6	114031275	164058243	85	0.00119918
6	114185499	164259420	85	0.000164401
6	114286456	164383521	85	0.0149424
6	114392780	164483539	85	0.000378173
6	114497485	164589045	85	0.00138102
6	114625448	164696293	85	0.0224763
6	114744736	164945511	85	0.00157852
6	115213214	165282360	85	0.00526482
6	115313469	165382539	85	0.00101956
6	115608346	165706881	85	0.00265721
6	115717619	165844251	85	0.00242841
6	115924279	165944280	85	0.0190354
6	116026257	166062379	85	0.0150049
6	116143788	166163543	85	0.0544413
6	116244029	166274229	85	1.3177e-05
6	116348931	166403456	85	0.0142718
6	116515884	166615367	85	0.0370421
6	116633811	166732338	85	0.0110714
6	116734926	166850798	85	0.044112
6	116937342	166977422	85	0.00641387
6	117081132	167084547	85	0.0178248
6	117181666	167188350	85	0.0157969
6	117281747	167288449	85	0.00655071
6	117385749	167388843	85	0.00554062
6	117485920	167490945	85	0.00375745
6	117600198	167604257	85	0.0170364
6	117725912	167809104	85	0.0218198
6	117834444	167930704	85	0.00537648
6	118103840	168156790	85	0.023823
6	118427216	168492221	85	0.00187306
6	118552454	168595619	85	0.0204512
6	118729063	168885682	85	0.0938033
6	118931666	168988186	85	0.0353527
6	119050523	169187673	85	0.000303521
6	119247734	169303183	85	0.00246552
6	119348267	169414297	85	0.0179681
6	119462950	169546486	85	3.79407e-05
6	119703776	169814764	85	9.46595e-05
6	119910399	169980900	85	0.00897878
6	120024883	170083019	85	0.00287799
6	120131779	170185467	85	0.0103537
6	120232285	170405021	85	0.00232806
6	120682845	170814115	85	0.0246569
7	59417	50172468	85	0.00403349
7	173754	50309615	85	0.00812679
7	653365	50751090	85	0.0179925
7	1017339	51040256	85	9.72245e-05
7	1118575	51151231	85	0.0068636
7	1257499	51261280	85	0.00138523
7	1389594	51500101	85	0.0134574
7	1517700	51682401	85	0.00482823
7	1790617	51800061	85	0.0690959
7	1890747	51905849	85	0.095139
7	1993399	52006246	85	0.0276265
7	2249225	52296778	85	0.00508504
7	2359918	52451766	85	0.00192359
7	2465087	52551830	85	0.00014709
7	2578455	52651896	85	4.19621e-06
7	2712833	52796533	85	0.0217007
7	2817455	52971184	85	0.0192517
7	3021136	53103371	85	0.0248198
7	3122687	53204111	85	6.05055e-05
7	3227986	53323307	85	0.030709
7	3539520	53637372	85	0.0153118
7	3667920	53769196	85	0.00653584
7	3886798	53893038	85	0.0737368
7	4014984	54115060	85	0.00493419
7	4139785	54250626	85	0.0223695
7	4259953	54356020	85	0.0334448
7	4372655	54456586	85	0.00196655
7	4496178	54566038	85	0.00339517
7	4597791	54698671	85	0.00171886
7	4712720	54799368	85	0.011939
7	4926802	55089831	85	0.0120348
7	5132148	55221655	85	0.00424446
7	5261772	55341756	85	0.00193504
7	5363981	55442202	85	0.00159866
7	5473107	55544724	85	0.0482349
7	5618176	55658415	85	0.00481423
7	5770889	55778416	85	0.00956575
7	5893666	55981083	85	0.0015003
7	6026775	56082992	85	0.0314624
7	6141873	56183047	85	0.0158305
7	6250389	56319009	85	0.000325913
7	6370077	56457887	85	0.0169824
7	6604983	56809531	85	0.0651369
7	6941110	57155738	85	0.000150669
7	7221968	57257063	85	0.0178081
7	7339429	57384271	85	0.000267455
7	7492175	57498228	85	0.00188992
7	11564331	62397642	85	0.00224945
7	11676694	66776333	85	0.015151
7	11825800	66903233	85	0.000753044
7	12173145	67535796	85	0.00227451
7	12597907	67635856	85	0.00423198
7	12732250	67870259	85	0.0623189
7	12857285	68015042	85	0.00102879
7	12964022	68253974	85	0.00524362
7	13337301	68457669	85	0.0325647
7	13471009	68607776	85	0.00456304
7	13584869	68715427	85	0.000587482
7	13685734	70062735	85	0.00626578
7	13793002	70171159	85	0.0150124
7	13901258	70283030	85	0.0344539
7	14004670	70622697	85	0.0323943
7	14119102	70764516	85	0.0130159
7	14242077	71417057	85	0.0598556
7	14365180	71953948	85	0.0233043
7	14477107	72782939	85	4.21156e-05
7	14619026	72918043	85	3.93104e-06
7	14719914	73258289	85	0.00620476
7	15087513	73392603	85	0.0012969
7	15463149	73517114	85	0.017261
7	15805403	73874881	85	0.0374907
7	15948315	74076493	85	0.0115925
7	16626210	74483374	85	0.00110305
7	16754960	75595970	85	0.00156567
7	16903052	76637441	85	0.00033843
7	17016136	76908199	85	0.0013594
7	17118311	77078602	85	0.00434018
7	17379110	77180625	85	0.0502565
7	18238845	78141660	85	0.0262049
7	18705964	78261386	85	0.00558728
7	19052733	78985357	85	0.00123719
7	20705278	80549535	85	0.0531047
7	20806534	80656927	85	0.0100324
7	21096695	80860629	85	4.60617e-05
7	21215112	80969310	85	0.0221165
7	21316743	81070971	85	0.00130251
7	21424543	81294352	85	0.00267014
7	21627909	81411265	85	0.0160195
7	21893504	81654477	85	0.0909683
7	21994659	81880352	85	0.00185805
7	22567687	82485050	85	0.00791481
7	22781657	82628178	85	0.0461488
7	23721978	83649231	85	0.0163425
7	23924009	83786844	85	0.00417672
7	24124846	83998182	85	0.00693682
7	79752402	139658582	85	0.0413534
7	79865575	139848444	85	0.00117011
7	80292104	140192795	85	0.000985123
7	84723651	144354447	85	0.0570036
7	85004375	144455025	85	0.00548885
7	85136410	144566608	85	0.00195262
7	85441442	144869821	85	0.0173725
7	86617463	145173976	85	0.00291901
7	87604188	146090557	85	8.49517e-05
7	89098756	146291593	85	0.0384737
7	89335191	146453977	85	0.00227592
7	89441968	146580713	85	8.00395e-05
7	90142375	146721859	85	0.0222764
7	90747257	146823361	85	0.00063749
7	90871330	147203791	85	0.00162832
7	90977874	147413478	85	0.00272545
7	91224839	147517124	85	0.0108324
7	92095523	147902079	85	0.00783041
7	92707215	148035192	85	0.00169722
7	93358703	148137646	85	0.00789601
7	93601541	148269912	85	0.0111944
7	93720528	148370375	85	0.00791623
7	94003260	148474746	85	0.00766002
7	94139580	148698909	85	0.0177559
7	95012099	148934783	85	0.0325118
7	95219511	149067586	85	0.00126448
7	95349686	149256086	85	0.0399926
7	95631196	149465674	85	0.000212451
7	96484741	149582166	85	0.0393271
7	96708789	149786096	85	0.00617481
7	97025910	150079459	85	0.0172365
7	98288549	150521096	85	0.0195503
7	98495954	150893629	85	0.0123734
7	98933552	150994093	85	0.0035321
7	100278282	151395637	85	0.0289641
7	100612478	151501817	85	0.0153388
7	101349638	151602696	85	0.00112561
7	101626640	151770235	85	0.00834459
7	101835352	151870678	85	0.000371568
7	101949128	152063213	85	8.44309e-06
7	102333029	152426359	85	0.0414474
7	102445158	152570448	85	0.00216687
7	102653127	152709572	85	0.025695
7	102760511	152832074	85	0.00684065
7	102914883	152949137	85	0.00232975
7	103052731	153150090	85	0.00103326
7	103170790	153262362	85	0.00695922
7	103297054	153402084	85	0.00034051
7	103501546	153522175	85	0.000615226
7	103625877	153646492	85	0.000155854
7	103790469	153878831	85	0.0139377
7	103916484	153980399	85	0.00641072
7	104017223	154095687	85	0.0157819
7	104117988	154196001	85	0.000448565
7	104280981	154376620	85	0.000146361
7	104382873	154477036	85	0.0230953
7	104486707	154578547	85	0.0212324
7	104657444	154680910	85	0.00175844
7	104764977	154847627	85	4.12124e-05
7	105075067	155170103	85	0.0100003
7	105175415	155270249	85	0.0098604
7	105288867	155382062	85	0.000756611
7	105396861	155483005	85	0.0201666
7	105533916	155603978	85	1.37449e-05
7	105640536	155754915	85	0.000423474
7	105934803	155936288	85	0.0141111
7	106210885	156266712	85	0.0355808
7	106359216	156399953	85	0.00501836
7	106474536	156742749	85	0.00886073
7	106812246	156843658	85	0.00230802
7	106973534	156976077	85	0.0204387
7	107075569	157146658	85	0.0408468
7	107175924	157272072	85	2.09581e-05
7	107293938	157372906	85	0.0371877
7	107470831	157474053	85	0.0161307
7	107570927	157588588	85	0.00389943
7	107697716	157710770	85	0.00640058
7	107797860	157818754	85	0.00443316
7	107898390	157920698	85	0.0004623
7	108098223	158136164	85	0.0192835
7	108471545	158532007	85	0.00068405
7	108740009	158793098	85	0.000426593
7	108850284	158893193	85	0.0147577
8	181662	50226842	85	0.0102276
8	313173	50327212	85	1.60595e-06
8	516479	50539369	85	0.0237043
8	784968	50808334	85	0.000342499
8	911040	51029173	85	0.00109012
8	1086161	51196639	85	0.00292979
8	1202832	51360123	85	0.0152664
8	1407652	51516341	85	0.00542384
8	1613275	51616538	85	0.00030119
8	1765720	51786784	85	0.000144727
8	1868842	51890974	85	0.0174955
8	1969137	52070410	85	0.0438957
8	2105181	52285581	85	0.0239297
8	2364054	52420536	85	0.0038983
8	2492642	52523642	85	0.00280584
8	2608638	52666155	85	0.0073229
8	2720258	52766522	85	0.0465492
8	2924429	53071461	85	0.0124133
8	3125966	53172159	85	0.0129227
8	3226120	53301331	85	0.0702238
8	3332750	53432734	85	0.00350475
8	3435125	53533001	85	0.00156276
8	3535789	53637148	85	0.000710667
8	3853247	53863404	85	0.00276127
8	3957949	53966205	85	0.00721619
8	4063635	54067535	85	0.00018931
8	4164975	54367306	85	0.0121258
8	4481250	55083270	85	0.00432338
8	4832489	55504076	85	1.99586e-06
8	4940078	56001871	85	0.0320767
8	5061029	56346682	85	0.000484841
8	5184562	56597845	85	0.00199959
8	5291968	56701107	85	0.0103286
8	5409371	56921672	85	0.0057376
8	5554323	58217431	85	0.0134469
8	5715867	58760144	85	0.00174151
8	5986953	58878355	85	0.000371669
8	6117400	59097836	85	0.0101648
8	6220145	59617094	85	0.0507536
8	6438039	60038104	85	0.000676043
8	6541450	61150373	85	0.00284569
8	6641529	61308774	85	7.43143e-07
8	6774414	61901412	85	0.00295285
8	6881988	62002052	85	0.000867258
8	8231793	62126521	85	0.0725607
8	8347822	62237603	85	0.0391265
8	8522243	62576242	85	0.00118436
8	8657930	62847117	85	0.00120758
8	8764956	63476225	85	0.000542107
8	8883905	64134586	85	4.57833e-05
8	9028461	64658276	85	0.0136918
8	9139055	65290439	85	0.0160533
8	9249888	66129990	85	0.0158668
8	9765888	66288887	85	0.00728168
8	9976021	66409301	85	3.45988e-05
8	10203480	67138453	85	0.00387218
8	10316170	67341938	85	0.00458852
8	11285384	69835492	85	0.00873278
8	12472621	70373728	85	4.40981e-05
8	14220114	72443097	85	0.000594107
8	14350149	72551111	85	0.025798
8	14680182	72685890	85	0.0227574
8	15178106	73030804	85	0.020692
8	16190599	73739252	85	0.0105022
8	16326036	73851875	85	0.0139723
8	16634563	74163369	85	0.00215553
8	16792146	75192666	85	0.0124798
8	17263606	75949051	85	0.0569155
8	17375776	76642764	85	0.00830639
8	67910769	127698883	85	0.0373947
8	68917901	128214499	85	0.0121347
8	69559299	128637028	85	0.00803798
8	70584628	129304851	85	0.0144492
8	71501474	130179293	85	0.000147406
8	73385076	132329968	85	0.00221868
8	74273314	132889906	85	0.00944285
8	74402156	133111252	85	0.000452817
8	75086015	133337663	85	0.013927
8	76169171	133839341	85	0.0025824
8	76269976	133960288	85	0.00791823
8	76438290	134065873	85	0.00118605
8	77473024	134194546	85	0.0122273
8	77690380	134297943	85	0.00209082
8	77912887	134415748	85	0.00625562
8	78141724	134526891	85	0.0109512
8	79081279	134667974	85	0.00182841
8	79818321	134777148	85	0.0035853
8	80017765	134886717	85	5.64888e-05
8	80784103	134994261	85	2.08471e-05
8	81320578	135197048	85	0.0033875
8	81464148	135302441	85	0.000828073
8	81801539	135412090	85	0.00972394
8	82009043	135850898	85	0.000133574
8	82232665	135957828	85	0.00342919
8	82339498	136066855	85	0.00331427
8	82728538	136168795	85	0.00207597
8	83072464	136317493	85	0.0034426
8	83841511	136500242	85	0.00621049
8	84081104	136690813	85	0.00305041
8	84741395	136853797	85	0.00575591
8	85027318	137321806	85	0.00786366
8	85447056	137509472	85	0.00202639
8	87229702	137689302	85	0.00127496
8	87784959	137798215	85	0.00316306
8	87900893	137999504	85	0.00390557
[truncated: 1,514 more rows]
