# Supplementary material for: A sex-specific evolutionary interaction between ADCY9 and CETP
Source: eLife journal article supplement (doi:10.7554/elife.69198), 2021-10-05

## 2-way interaction on CETP expression

**a** (Skin-Sun Exposed – Male, N=330; Female, N=177)

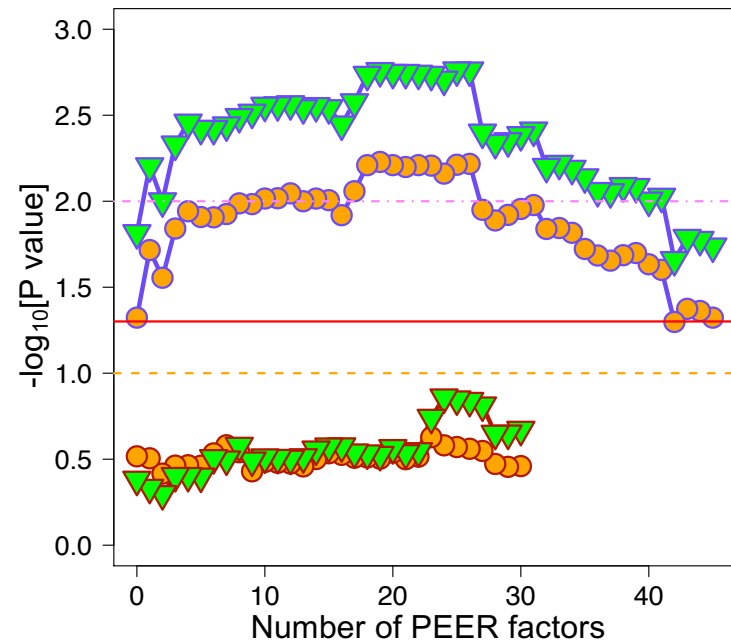

## 3-way interaction on CETP expression

**b** (Skin-Sun Exposed – N=507)

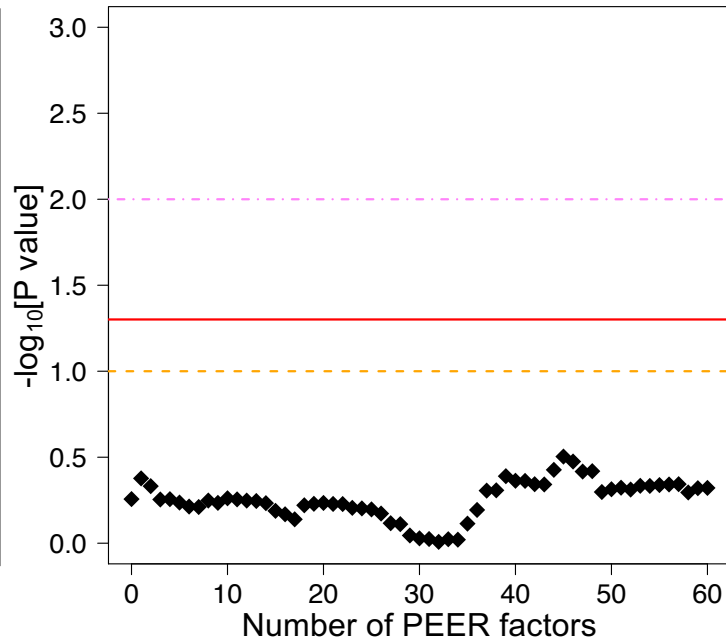

## 2-way interaction on CETP expression

**c** (Tibial Artery – Male, N=321; Female, N=156)

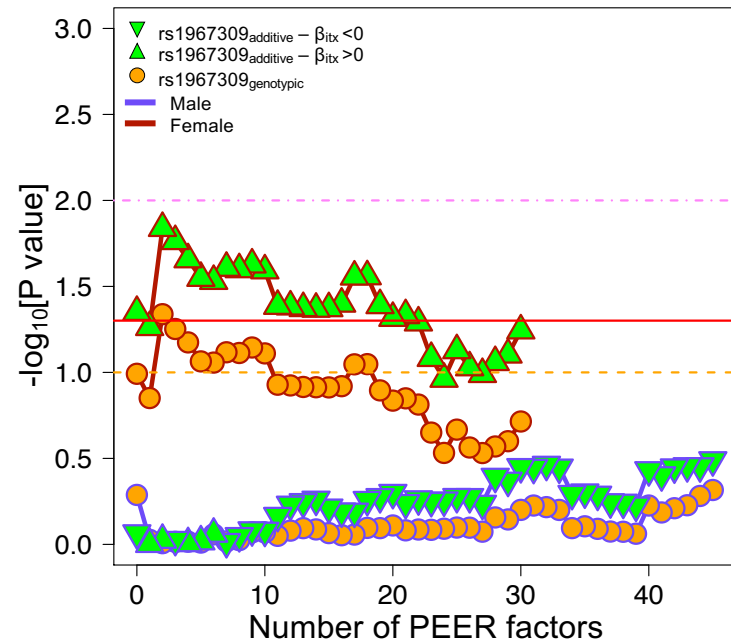

## 3-way interaction on CETP expression

**d** (Tibial Artery – N=477)

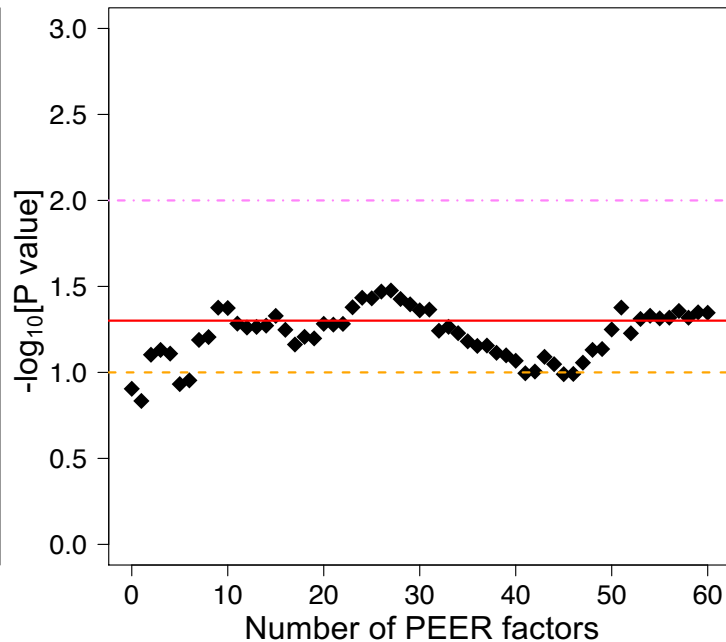

Supplement: supp [file elife-69198-supp-v1.zip › elife_poa_e69198_Figure_5_figure_supplement_2.pdf]
