# Supplementary material for: A sex-specific evolutionary interaction between ADCY9 and CETP
Source: eLife journal article supplement (doi:10.7554/elife.69198), 2021-10-05
Supplement: supp [file elife-69198-supp-v1.zip › elife_poa_e69198_Figure_5_source_data_1.txt]

Name	Scr-1	Scr-2	Scr-3	Scr-4	Scr-5	si-1039-1	si-1039-2	si-1039-3	si-1039-4	si-1039-5
ENSG00000162104	4.79580083154366	5.6639030196146	5.69848357177604	5.55134166169103	5.73161615618518	1.45594195427764	2.39649994853011	2.29919103042376	1.88750475851985	1.98716405175671
ENSG00000087237	-0.131615102621696	-1.35388791883594	-2.26429678202876	-0.231547733000927	0.186664861677955	1.16450593301885	-0.410854973527497	-1.06846433812073	1.07569018827154	1.54113774127947
