# Supplementary figures and images for: A sex-specific evolutionary interaction between ADCY9 and CETP
Source: eLife journal article supplement (doi:10.7554/elife.69198), 2021-10-05

**a** LRLD in CETP - Andean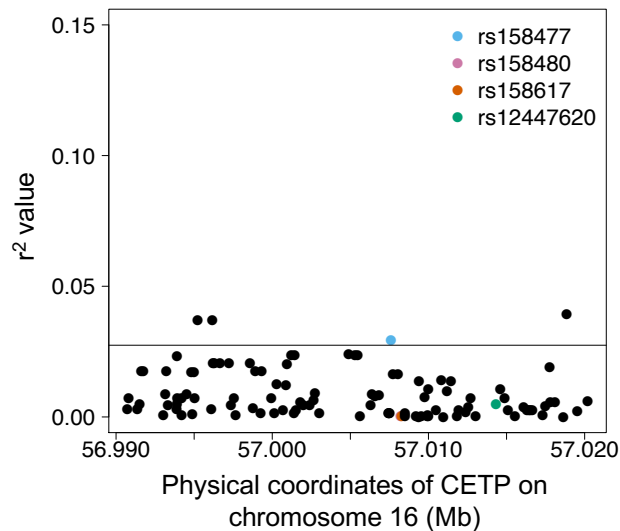**b** LRLD in ADCY9 - Andean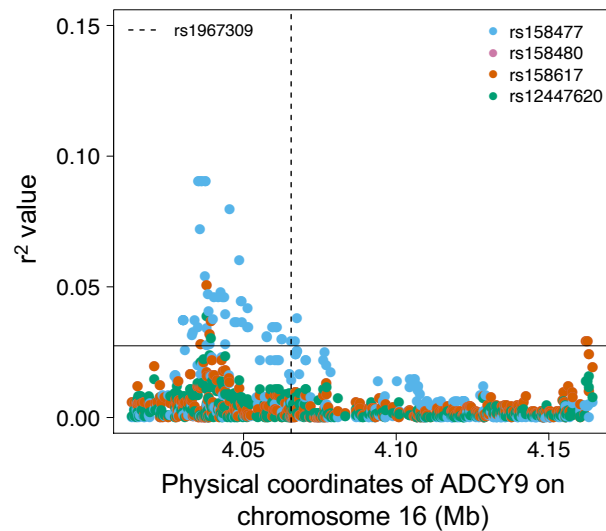**c** LRLD in CETP - LIMAA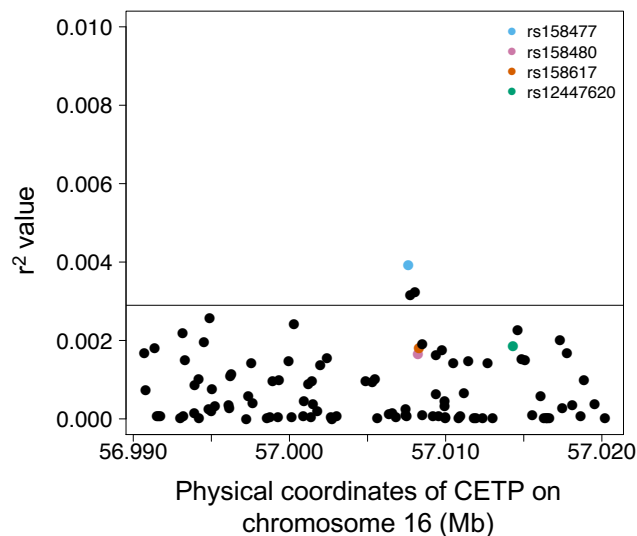**d** LRLD in ADCY9 - LIMAA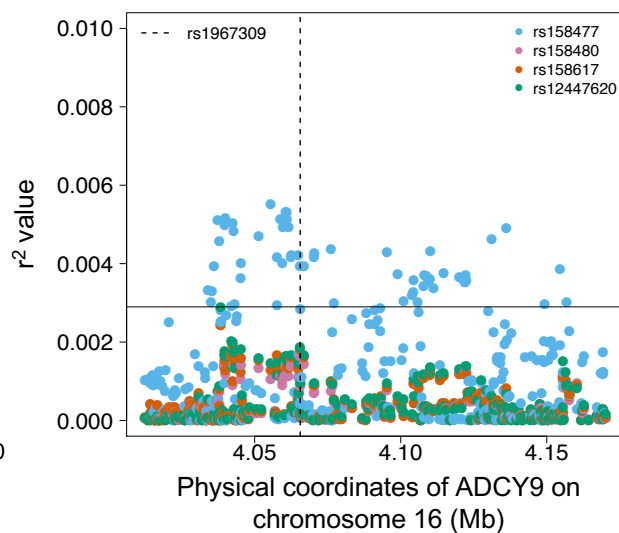

Supplement: supp [file elife-69198-supp-v1.zip › elife_poa_e69198_Figure_3_figure_supplement_1.pdf]

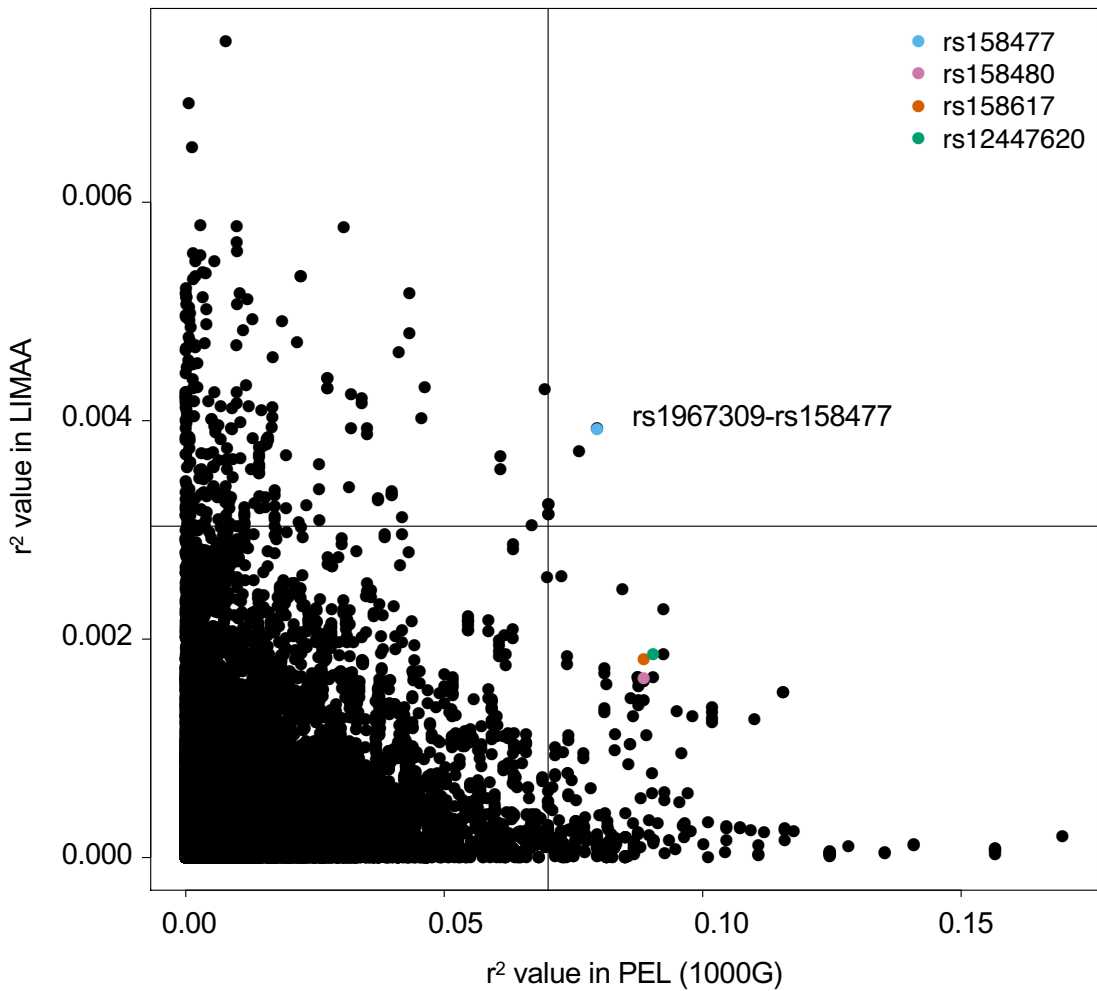

Supplement: supp [file elife-69198-supp-v1.zip › elife_poa_e69198_Figure_3_figure_supplement_2.pdf]

# Females

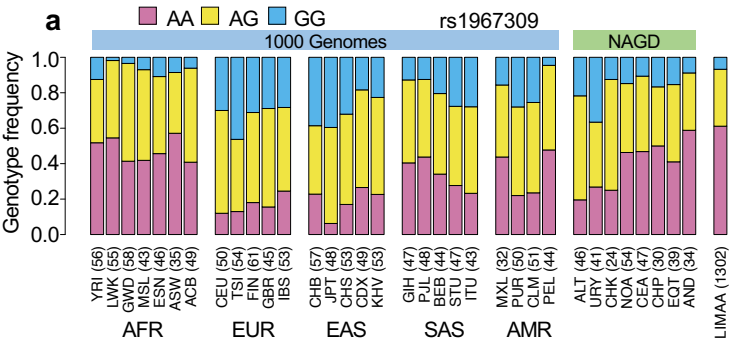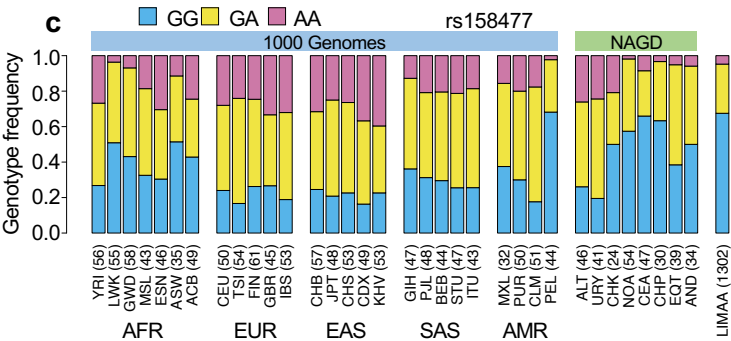

# Males

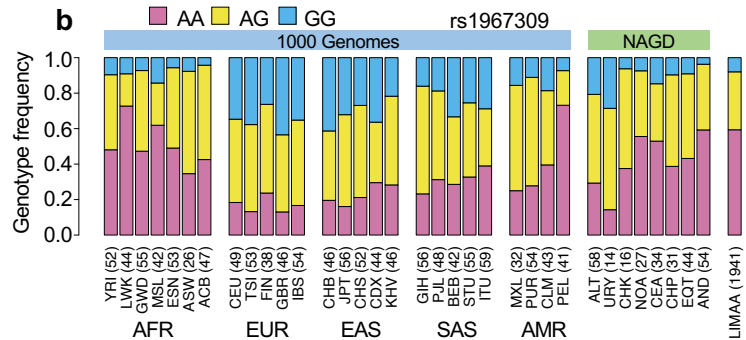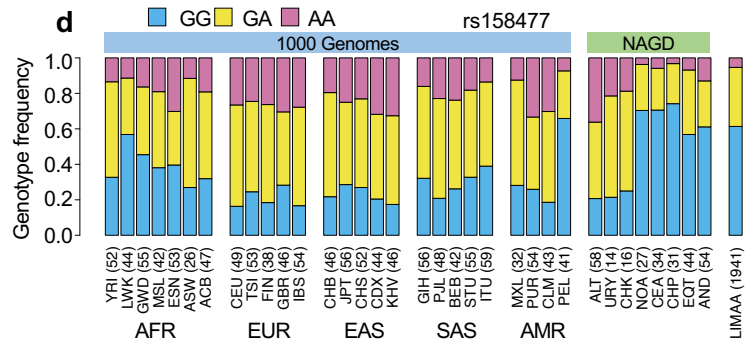

Supplement: supp [file elife-69198-supp-v1.zip › elife_poa_e69198_Figure_4_figure_supplement_1.pdf]

**a**

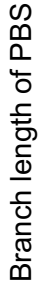**b**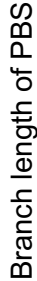

Supplement: supp [file elife-69198-supp-v1.zip › elife_poa_e69198_Figure_4_figure_supplement_2.pdf]

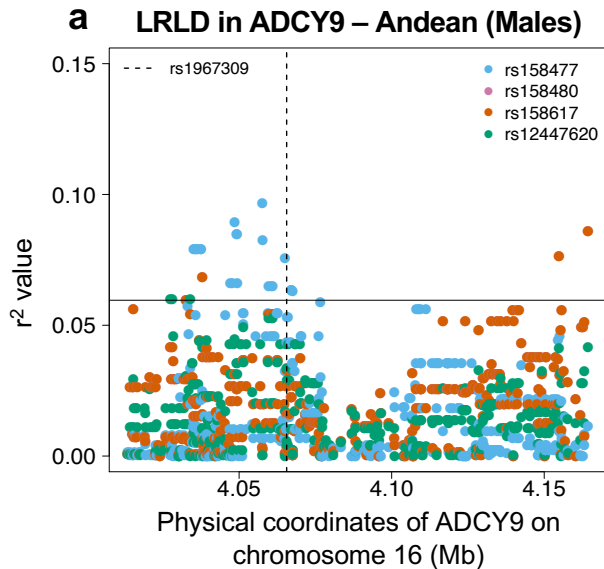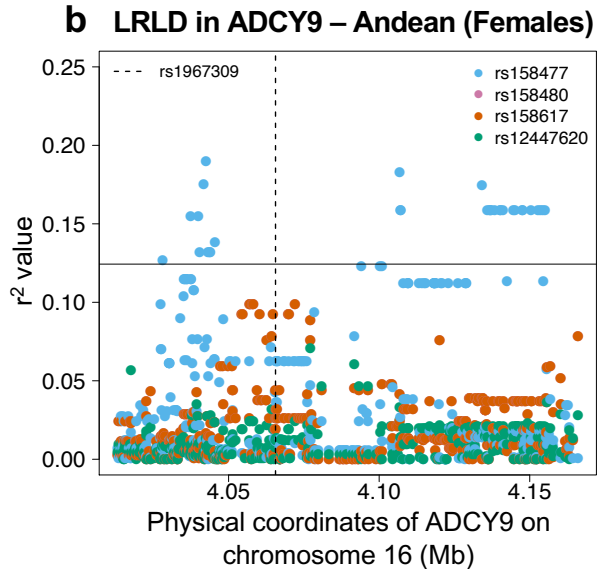

Supplement: supp [file elife-69198-supp-v1.zip › elife_poa_e69198_Figure_4_figure_supplement_3.pdf]

## ADCY9 knock-down

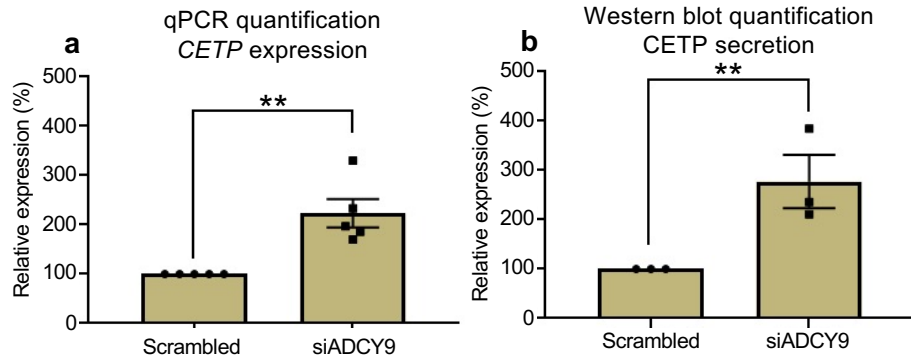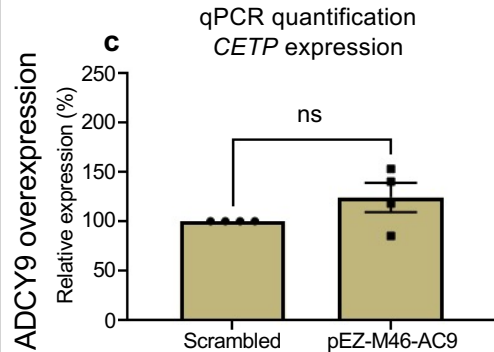

## CETP knock-down

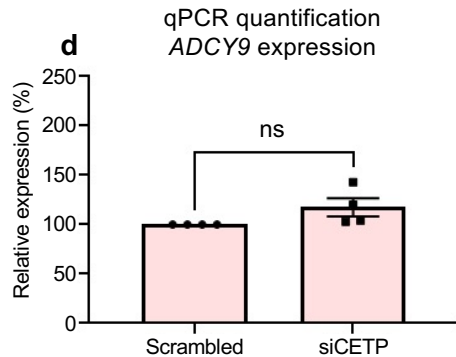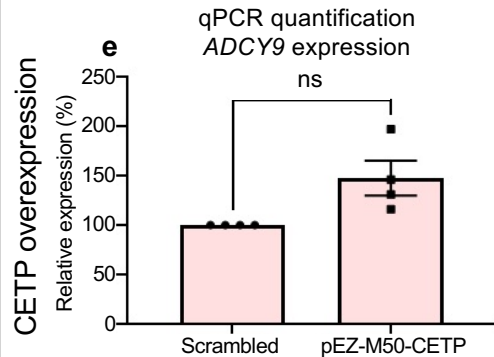

Supplement: supp [file elife-69198-supp-v1.zip › elife_poa_e69198_Figure_5_figure_supplement_1.pdf]

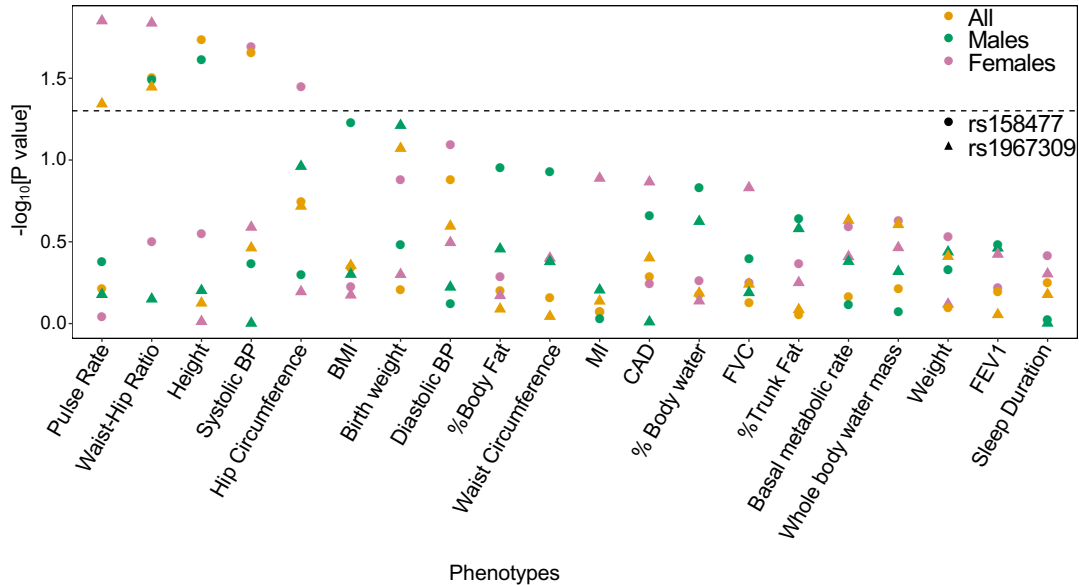

Supplement: supp [file elife-69198-supp-v1.zip › elife_poa_e69198_Figure_6_figure_supplement_1.pdf]

**a**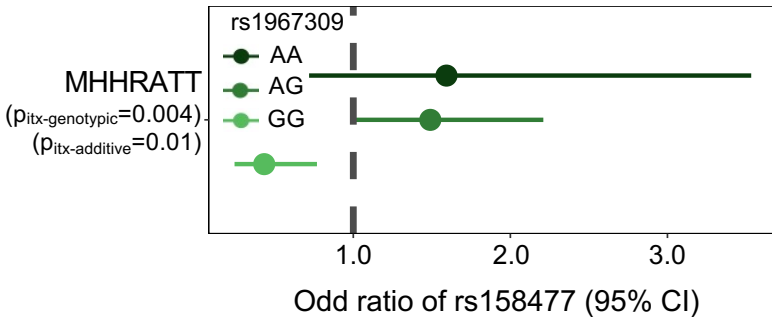**b**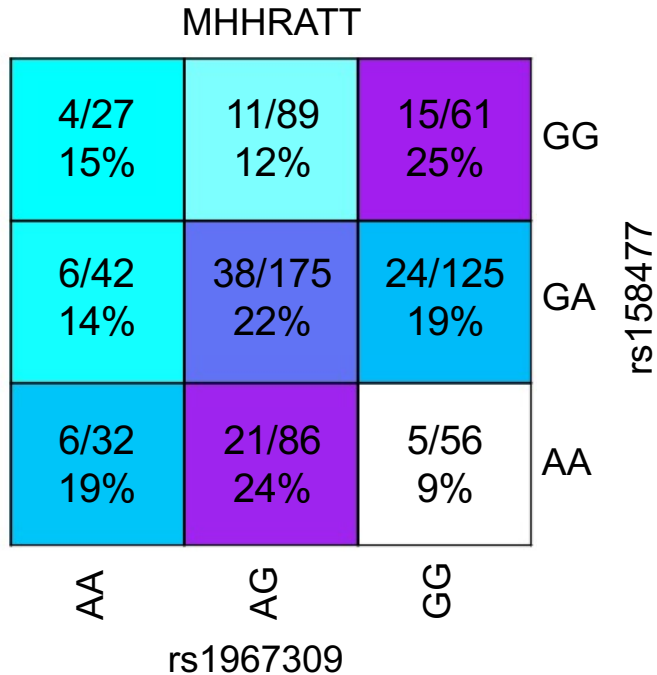

Supplement: supp [file elife-69198-supp-v1.zip › elife_poa_e69198_Figure_6_figure_supplement_2.pdf]
